# Supplementary material for: Impact of the gut microbiome on skin fibrosis: a Mendelian randomization study
Source: Front Med (Lausanne). 2024 Apr 17;11:1380938. doi: 10.3389/fmed.2024.1380938 (PMC11061451; doi:10.3389/fmed.2024.1380938)
Supplement: Supplementary file 15 [file Table_1.XLSX]

## Sheet: Gut microbiome traits detail
Gut microbiome traits information
phylum	class	order	family	genus
phylum.Actinobacteria.id.400	class.Bacilli.id.1673	order.Lactobacillales.id.1800	family.Streptococcaceae.id.1850	genus..Ruminococcustorquesgroup.id.14377
phylum.Lentisphaerae.id.2238	class.Actinobacteria.id.419	order.Bifidobacteriales.id.432	family.Bifidobacteriaceae.id.433	genus.RuminococcaceaeUCG005.id.11363
phylum.Tenericutes.id.3919	class.Betaproteobacteria.id.2867	order.Gastranaerophilales.id.1591	family.Rikenellaceae.id.967	genus.RuminococcaceaeUCG003.id.11361
phylum.Cyanobacteria.id.1500	class.Mollicutes.id.3920	order.Bacteroidales.id.913	family.Porphyromonadaceae.id.943	genus.Allisonella.id.2174
phylum.Bacteroidetes.id.905	class.Melainabacteria.id.1589	order.Methanobacteriales.id.120	family.Ruminococcaceae.id.2050	genus.Bifidobacterium.id.436
phylum.Firmicutes.id.1672	class.Bacteroidia.id.912	order.Bacillales.id.1674	family.ClostridialesvadinBB60group.id.11286	genus.Sellimonas.id.14369
phylum.Euryarchaeota.id.55	class.Methanobacteria.id.119	order.Rhodospirillales.id.2667	family.Rhodospirillaceae.id.2717	genus.Butyrivibrio.id.1993
phylum.Proteobacteria.id.2375	class.Gammaproteobacteria.id.3303	order.Clostridiales.id.1863	family.Methanobacteriaceae.id.121	genus.Howardella.id.2000
phylum.Verrucomicrobia.id.3982	class.Clostridia.id.1859	order.Erysipelotrichales.id.2148	family.Alcaligenaceae.id.2875	genus.Peptococcus.id.2037
	class.Erysipelotrichia.id.2147	order.Pasteurellales.id.3688	family.Oxalobacteraceae.id.2966	genus.Parasutterella.id.2892
	class.Alphaproteobacteria.id.2379	order.Coriobacteriales.id.810	family.FamilyXI.id.1936	genus..Ruminococcusgnavusgroup.id.14376
	class.Coriobacteriia.id.809	order.Enterobacteriales.id.3468	family.Prevotellaceae.id.960	genus.Paraprevotella.id.962
	class.Verrucomicrobiae.id.4029	order.Verrucomicrobiales.id.4030	family.Erysipelotrichaceae.id.2149	genus.Subdoligranulum.id.2070
	class.Lentisphaeria.id.2250	order.Victivallales.id.2254	family.Peptostreptococcaceae.id.2042	genus.Dialister.id.2183
	class.Deltaproteobacteria.id.3087	order.Desulfovibrionales.id.3156	family.Pasteurellaceae.id.3689	genus.CandidatusSoleaferrea.id.11350
	class.Negativicutes.id.2164	order.NB1n.id.3953	family.Lachnospiraceae.id.1987	genus.LachnospiraceaeFCS020group.id.11314
		order.Actinomycetales.id.420	family.Coriobacteriaceae.id.811	genus.Odoribacter.id.952
		order.Burkholderiales.id.2874	family.Enterobacteriaceae.id.3469	genus.Coprococcus1.id.11301
		order.Selenomonadales.id.2165	family.Veillonellaceae.id.2172	genus.Parabacteroides.id.954
		order.MollicutesRF9.id.11579	family.Verrucomicrobiaceae.id.4036	genus.RikenellaceaeRC9gutgroup.id.11191
			family.Desulfovibrionaceae.id.3169	genus.Desulfovibrio.id.3173
			family.Defluviitaleaceae.id.1924	genus..Eubacteriumnodatumgroup.id.11297
			family.Actinomycetaceae.id.421	genus..Eubacteriumruminantiumgroup.id.11340
			family.Bacteroidaceae.id.917	genus..Eubacteriumventriosumgroup.id.11341
			family.Victivallaceae.id.2255	genus..Eubacteriumxylanophilumgroup.id.14375
			family.Lactobacillaceae.id.1836	genus.ErysipelotrichaceaeUCG003.id.11384
			genus.FamilyXIIIUCG001.id.11294	genus.Anaerostipes.id.1991
			family.Peptococcaceae.id.2024	genus.Ruminiclostridium9.id.11357
			family.FamilyXIII.id.1957	genus.Ruminococcus2.id.11374
			genus.FamilyXIIIAD3011group.id.11293	genus.Methanobrevibacter.id.123
			family.Clostridiaceae1.id.1869	genus.Coprococcus3.id.11303
			family.BacteroidalesS24.7group.id.11173	genus.LachnospiraceaeUCG004.id.11324
			family.Acidaminococcaceae.id.2166	genus..Eubacteriumcoprostanoligenesgroup.id.11375
			family.Christensenellaceae.id.1866	genus..Eubacteriumrectalegroup.id.14374
				genus.Ruminococcus1.id.11373
				genus.Intestinimonas.id.2062
				genus.Romboutsia.id.11347
				genus.RuminococcaceaeUCG010.id.11367
				genus.Lachnoclostridium.id.11308
				genus.Olsenella.id.822
				genus.Butyricimonas.id.945
				genus.ChristensenellaceaeR.7group.id.11283
				genus.Lactococcus.id.1851
				genus.LachnospiraceaeUCG010.id.11330
				genus.Ruminiclostridium5.id.11355
				genus.Streptococcus.id.1853
				genus.Oxalobacter.id.2978
				genus.Victivallis.id.2256
				genus.Flavonifractor.id.2059
				genus.LachnospiraceaeUCG001.id.11321
				genus.Ruminiclostridium6.id.11356
				genus.Prevotella9.id.11183
				genus.LachnospiraceaeUCG008.id.11328
				genus.Bilophila.id.3170
				genus.Enterorhabdus.id.820
				genus.LachnospiraceaeNK4A136group.id.11319
				genus.Haemophilus.id.3698
				genus.RuminococcaceaeUCG004.id.11362
				genus.Intestinibacter.id.11345
				genus.Anaerofilum.id.2053
				genus..Eubacteriumhalliigroup.id.11338
				genus.Faecalibacterium.id.2057
				genus.RuminococcaceaeUCG013.id.11370
				genus.RuminococcaceaeUCG011.id.11368
				genus.RuminococcaceaeUCG002.id.11360
				genus..Ruminococcusgauvreauiigroup.id.11342
				genus.RuminococcaceaeUCG014.id.11371
				genus.Alistipes.id.968
				genus.Holdemania.id.2157
				genus.Eisenbergiella.id.11304
				genus.Lachnospira.id.2004
				genus.Terrisporobacter.id.11348
				genus.Turicibacter.id.2162
				genus.Gordonibacter.id.821
				genus.Tyzzerella3.id.11335
				genus.Blautia.id.1992
				genus.Oscillibacter.id.2063
				genus.Coprococcus2.id.11302
				genus.Akkermansia.id.4037
				genus..Eubacteriumbrachygroup.id.11296
				genus.Veillonella.id.2198
				genus.Eggerthella.id.819
				genus.LachnospiraceaeND3007group.id.11317
				genus.Slackia.id.825
				genus.DefluviitaleaceaeUCG011.id.11287
				genus.Escherichia.Shigella.id.3504
				genus.Marvinbryantia.id.2005
				genus.RuminococcaceaeNK4A214group.id.11358
				genus.Actinomyces.id.423
				genus.Clostridiumsensustricto1.id.1873
				genus.Bacteroides.id.918
				genus.Roseburia.id.2012
				genus.Lactobacillus.id.1837
				genus.FamilyXIIIUCG001.id.11294
				genus.Senegalimassilia.id.11160
				genus..Eubacteriumfissicatenagroup.id.14373
				genus.LachnospiraceaeNC2004group.id.11316
				genus.Oscillospira.id.2064
				genus.FamilyXIIIAD3011group.id.11293
				genus.Catenibacterium.id.2153
				genus..Eubacteriumoxidoreducensgroup.id.11339
				genus.Phascolarctobacterium.id.2168
				genus.RuminococcaceaeUCG009.id.11366
				genus.Holdemanella.id.11393
				genus.Adlercreutzia.id.812
				genus.Barnesiella.id.944
				genus.Alloprevotella.id.961
				genus.Fusicatenibacter.id.11305
				genus.Sutterella.id.2896
				genus.Dorea.id.1997
				genus.Coprobacter.id.949
				genus.Butyricicoccus.id.2055
				genus.Prevotella7.id.11182
				genus.Erysipelatoclostridium.id.11381
				genus..Clostridiuminnocuumgroup.id.14397
				genus.Collinsella.id.815
				genus..Eubacteriumeligensgroup.id.14372
