# Supplementary material for: Impact of the gut microbiome on skin fibrosis: a Mendelian randomization study
Source: Front Med (Lausanne). 2024 Apr 17;11:1380938. doi: 10.3389/fmed.2024.1380938 (PMC11061451; doi:10.3389/fmed.2024.1380938)
Supplement: Supplementary file 16 [file Table_2.XLSX]

## Sheet: Sheet1
Supplemental Table 2. SNPs associated with gut microbiome (p < 5E-06).
Exposure	SNP	Other_allele	Effect_allele	β	SE	Smaplesize	p-value	F
class.Actinobacteria.id.419	rs10841473	C	G	-0.0583765	0.0123353	16311	2.21814e-06	22.3934
class.Actinobacteria.id.419	rs11745923	T	G	0.0563759	0.0115529	16312	1.06194e-06	23.8095
class.Actinobacteria.id.419	rs12899991	T	A	0.0719923	0.0154661	16182	3.24226e-06	21.6649
class.Actinobacteria.id.419	rs134366	A	G	0.111877	0.023501	14302	1.93106e-06	22.6593
class.Actinobacteria.id.419	rs1515761	C	T	0.0762317	0.0169884	15525	7.2138e-06	20.1331
class.Actinobacteria.id.419	rs182549	T	C	0.111489	0.012066	16313	2.46551e-20	85.3667
class.Actinobacteria.id.419	rs1961273	T	C	0.0602969	0.0126047	16313	1.72109e-06	22.8809
class.Actinobacteria.id.419	rs6660520	G	A	0.0711483	0.0134495	16308	1.22306e-07	27.9808
class.Actinobacteria.id.419	rs72767435	C	T	-0.126352	0.0273626	12898	3.88024e-06	21.3198
class.Actinobacteria.id.419	rs7322849	C	T	0.0944467	0.0192976	16313	9.86966e-07	23.9504
class.Actinobacteria.id.419	rs8047955	G	A	0.0575816	0.0116762	16306	8.15902e-07	24.317
class.Alphaproteobacteria.id.2379	rs10803434	T	A	-0.0692742	0.0148866	9115	3.26423e-06	21.6499
class.Alphaproteobacteria.id.2379	rs140912403	T	C	-0.160677	0.0317708	8520	4.25031e-07	25.5712
class.Alphaproteobacteria.id.2379	rs76784716	G	A	0.133271	0.0267738	9593	6.43499e-07	24.7722
class.Alphaproteobacteria.id.2379	rs9813022	G	A	-0.0751277	0.0153867	9593	1.04667e-06	23.8353
class.Bacilli.id.1673	rs11110282	G	A	-0.101189	0.0217379	16026	3.24e-06	21.6661
class.Bacilli.id.1673	rs11730038	A	G	-0.0630747	0.0128717	17377	9.57e-07	24.0097
class.Bacilli.id.1673	rs1962325	G	C	0.0554219	0.0114789	17356	1.38e-06	23.3083
class.Bacilli.id.1673	rs35344081	A	G	0.0619529	0.0127066	17374	1.08e-06	23.769
class.Bacilli.id.1673	rs4028634	C	T	0.0520614	0.0109842	17377	2.14e-06	22.462
class.Bacilli.id.1673	rs4459992	C	T	0.0535854	0.0116362	17362	4.12e-06	21.2042
class.Bacilli.id.1673	rs57872228	T	C	-0.0714773	0.0146647	17375	1.09e-06	23.7542
class.Bacilli.id.1673	rs74352383	A	T	-0.104496	0.0217083	16519	1.48e-06	23.1682
class.Bacilli.id.1673	rs76717940	A	T	0.156331	0.0325945	8017	1.62e-06	22.9982
class.Bacilli.id.1673	rs77558518	G	A	-0.107255	0.0222879	15836	1.49e-06	23.1548
class.Bacilli.id.1673	rs78938557	C	T	0.108007	0.0232858	15226	3.51e-06	21.5113
class.Bacilli.id.1673	rs9581006	T	C	0.225309	0.0467697	4253	1.45e-06	23.1966
class.Bacteroidia.id.912	rs111845179	C	T	0.102648	0.0213843	16393	1.58545e-06	23.0387
class.Bacteroidia.id.912	rs12938514	G	A	-0.199979	0.0416024	3350	1.53276e-06	23.0926
class.Bacteroidia.id.912	rs13291434	C	T	0.0694656	0.0149789	17400	3.52569e-06	21.5044
class.Bacteroidia.id.912	rs2032750	C	T	-0.0508393	0.0106807	17853	1.93683e-06	22.6542
class.Bacteroidia.id.912	rs55773148	A	G	-0.121514	0.0236759	11349	2.8611e-07	26.3366
class.Bacteroidia.id.912	rs73846128	G	A	-0.0648523	0.013349	18334	1.18451e-06	23.5996
class.Bacteroidia.id.912	rs7546249	A	T	-0.0567113	0.0118386	18333	1.66472e-06	22.9452
class.Bacteroidia.id.912	rs929878	T	C	-0.0548532	0.012153	18334	6.37455e-06	20.3701
class.Betaproteobacteria.id.2867	rs11128180	G	A	0.0592944	0.0128769	17151	4.13054e-06	21.2008
class.Betaproteobacteria.id.2867	rs12467854	C	G	0.0641363	0.0131766	17038	1.13061e-06	23.6891
class.Betaproteobacteria.id.2867	rs1511453	G	A	0.0923492	0.0199158	17085	3.53541e-06	21.499
class.Betaproteobacteria.id.2867	rs1928341	G	A	0.0525581	0.0110408	17150	1.93249e-06	22.6584
class.Betaproteobacteria.id.2867	rs2367850	C	G	0.064006	0.0130374	16717	9.13561e-07	24.0993
class.Betaproteobacteria.id.2867	rs2613606	T	C	-0.0513106	0.0109091	17146	2.55782e-06	22.12
class.Betaproteobacteria.id.2867	rs4033856	T	C	0.0832423	0.0167237	15945	6.44075e-07	24.7725
class.Betaproteobacteria.id.2867	rs6087811	G	T	-0.0978177	0.0198522	16184	8.3374e-07	24.2753
class.Betaproteobacteria.id.2867	rs62395635	C	T	0.109741	0.0236	15108	3.3188e-06	21.62
class.Betaproteobacteria.id.2867	rs72747231	G	C	-0.137281	0.0290338	11344	2.26396e-06	22.353
class.Betaproteobacteria.id.2867	rs9964679	G	A	0.052911	0.0114866	17151	4.09838e-06	21.2158
class.Clostridia.id.1859	rs10774377	G	A	0.052659	0.0113858	18330	3.74674e-06	21.3879
class.Clostridia.id.1859	rs112334273	A	G	0.0641008	0.0127404	18217	4.87124e-07	25.3114
class.Clostridia.id.1859	rs13179700	C	T	0.0511937	0.0109569	18338	2.97858e-06	21.8279
class.Clostridia.id.1859	rs2273429	G	A	-0.0724037	0.0153105	18337	2.256e-06	22.3612
class.Clostridia.id.1859	rs6814436	C	T	0.0739995	0.0150815	18336	9.26523e-07	24.0724
class.Clostridia.id.1859	rs6815608	C	T	0.103803	0.0210883	16731	8.55279e-07	24.2263
class.Clostridia.id.1859	rs72915163	C	T	-0.0581025	0.0120557	18317	1.43928e-06	23.2249
class.Coriobacteriia.id.809	rs11250875	C	T	0.06075	0.0130939	17690	3.49138e-06	21.5232
class.Coriobacteriia.id.809	rs1816223	G	A	-0.0586265	0.0129006	17688	5.50697e-06	20.65
class.Coriobacteriia.id.809	rs240104	C	T	-0.0603429	0.0126849	17577	1.96432e-06	22.6271
class.Coriobacteriia.id.809	rs34739816	T	G	0.0965017	0.0207666	16593	3.36847e-06	21.5917
class.Coriobacteriia.id.809	rs719099	G	A	0.0778402	0.0155815	17687	5.86301e-07	24.954
class.Coriobacteriia.id.809	rs80046645	G	C	0.25584	0.0561995	3204	5.30506e-06	20.7109
class.Deltaproteobacteria.id.3087	rs112381107	T	C	0.206594	0.0456908	4457	6.13829e-06	20.4354
class.Deltaproteobacteria.id.3087	rs11599763	C	T	-0.0544219	0.0117397	15168	3.55681e-06	21.4872
class.Deltaproteobacteria.id.3087	rs17791387	G	A	-0.0735881	0.0154246	15071	1.83476e-06	22.7577
class.Deltaproteobacteria.id.3087	rs2692012	G	A	0.110335	0.0253336	13104	1.32895e-05	18.9656
class.Deltaproteobacteria.id.3087	rs4506934	T	C	-0.0936514	0.02012	15061	3.24559e-06	21.6627
class.Deltaproteobacteria.id.3087	rs6058181	T	C	0.0825716	0.0165958	15100	6.50983e-07	24.7518
class.Deltaproteobacteria.id.3087	rs62020470	G	A	-0.0585411	0.0129358	15168	6.02539e-06	20.4774
class.Erysipelotrichia.id.2147	rs10781552	T	C	-0.0552212	0.0116074	17789	1.96096e-06	22.6304
class.Erysipelotrichia.id.2147	rs17530232	G	A	0.10305	0.0224648	16622	4.49263e-06	21.0397
class.Erysipelotrichia.id.2147	rs2300774	A	G	0.0524152	0.0106784	18216	9.17591e-07	24.0911
class.Erysipelotrichia.id.2147	rs35161940	C	T	-0.0806041	0.0167641	18213	1.52343e-06	23.1157
class.Erysipelotrichia.id.2147	rs4078432	T	C	-0.0608929	0.0133764	17789	5.30679e-06	20.7209
class.Erysipelotrichia.id.2147	rs62504403	T	C	0.0681159	0.0127883	16981	1.00175e-07	28.3673
class.Erysipelotrichia.id.2147	rs7234058	C	T	-0.0945759	0.0194091	16874	1.10047e-06	23.741
class.Erysipelotrichia.id.2147	rs8003149	T	C	0.0538798	0.0116888	18213	4.03592e-06	21.2454
class.Gammaproteobacteria.id.3303	rs11181912	A	G	-0.0579153	0.0118796	16017	1.08714e-06	23.7643
class.Gammaproteobacteria.id.3303	rs6469506	A	T	0.0541424	0.0116333	16023	3.2542e-06	21.6578
class.Gammaproteobacteria.id.3303	rs6706173	C	A	0.074251	0.0146392	16020	3.93548e-07	25.7225
class.Gammaproteobacteria.id.3303	rs9494710	T	C	-0.0549673	0.0120924	15650	5.47778e-06	20.6599
class.Lentisphaeria.id.2250	rs11770843	T	C	0.109431	0.0234879	4705	3.17698e-06	21.6974
class.Lentisphaeria.id.2250	rs17114848	A	G	0.152377	0.0324332	4734	2.62487e-06	22.0636
class.Lentisphaeria.id.2250	rs2031282	G	A	0.122369	0.0270329	4734	5.99274e-06	20.4819
class.Lentisphaeria.id.2250	rs2731834	G	C	0.109438	0.023693	4733	3.85603e-06	21.3261
class.Lentisphaeria.id.2250	rs2825714	G	A	-0.13741	0.0289246	4734	2.02778e-06	22.559
class.Lentisphaeria.id.2250	rs62570196	T	C	-0.21635	0.0439866	3712	8.71847e-07	24.1792
class.Lentisphaeria.id.2250	rs77599476	G	A	0.230292	0.0480168	3722	1.61812e-06	22.9899
class.Melainabacteria.id.1589	rs11150282	C	T	0.0989488	0.0196972	5873	5.07376e-07	25.227
class.Melainabacteria.id.1589	rs16851659	C	G	-0.0896103	0.0186432	5884	1.53527e-06	23.0954
class.Melainabacteria.id.1589	rs4129395	A	G	0.0896187	0.0185106	5887	1.28873e-06	23.432
class.Melainabacteria.id.1589	rs73074665	T	A	0.166216	0.0355728	5758	2.97475e-06	21.8252
class.Melainabacteria.id.1589	rs79790072	C	T	0.226722	0.0487841	4107	3.36052e-06	21.5883
class.Melainabacteria.id.1589	rs9864379	C	T	-0.159735	0.0292553	5777	4.76077e-08	29.8015
class.Methanobacteria.id.119	rs10202904	G	T	-0.121754	0.0235357	3695	2.30182e-07	26.747
class.Methanobacteria.id.119	rs62241835	T	G	-0.203385	0.0417931	3383	1.13601e-06	23.6687
class.Methanobacteria.id.119	rs73457410	G	A	0.21534	0.0436695	3498	8.17584e-07	24.3021
class.Methanobacteria.id.119	rs894996	A	C	0.216999	0.0449076	3582	1.35081e-06	23.3364
class.Mollicutes.id.3920	rs10108398	A	G	0.0769142	0.0153953	10932	5.85431e-07	24.9551
class.Mollicutes.id.3920	rs12566890	G	T	-0.101147	0.0230978	11371	1.19186e-05	19.1729
class.Mollicutes.id.3920	rs3768491	G	A	-0.0681052	0.0149061	11002	4.90185e-06	20.8715
class.Mollicutes.id.3920	rs6043847	C	T	-0.114937	0.0248606	11130	3.77745e-06	21.3707
class.Mollicutes.id.3920	rs67374027	T	A	0.0752392	0.0154766	11389	1.16517e-06	23.6297
class.Mollicutes.id.3920	rs72901605	C	T	-0.0841852	0.0178119	10526	2.286e-06	22.3341
class.Mollicutes.id.3920	rs74603314	C	T	0.221639	0.0462918	4499	1.68555e-06	22.9136
class.Negativicutes.id.2164	rs13086907	A	G	0.0625312	0.0131735	18163	2.06721e-06	22.5291
class.Negativicutes.id.2164	rs1447205	C	G	-0.0502053	0.0108382	18165	3.61703e-06	21.4554
class.Negativicutes.id.2164	rs1643968	C	T	-0.0565284	0.0112298	18170	4.80887e-07	25.3362
class.Negativicutes.id.2164	rs4722181	G	T	0.0501306	0.0105798	18163	2.15486e-06	22.4493
class.Negativicutes.id.2164	rs60274479	C	T	-0.0659623	0.0134137	17610	8.76408e-07	24.1794
class.Negativicutes.id.2164	rs61249479	C	A	0.0777075	0.0168628	18165	4.06137e-06	21.2333
class.Negativicutes.id.2164	rs71405394	A	G	-0.114178	0.02405	13861	2.05919e-06	22.5358
class.Negativicutes.id.2164	rs73232831	A	G	-0.151829	0.0314932	9382	1.42835e-06	23.2372
class.Verrucomicrobiae.id.4029	rs11184341	C	G	0.0655342	0.0142231	11864	4.07352e-06	21.2264
class.Verrucomicrobiae.id.4029	rs111862613	C	T	0.090699	0.0196746	11621	4.02761e-06	21.248
class.Verrucomicrobiae.id.4029	rs117107102	G	A	0.204683	0.0431573	4975	2.10865e-06	22.4844
class.Verrucomicrobiae.id.4029	rs11729256	C	T	0.0749798	0.0150177	11861	5.95195e-07	24.9235
class.Verrucomicrobiae.id.4029	rs12908520	A	G	0.0618926	0.0130946	11863	2.28353e-06	22.3366
class.Verrucomicrobiae.id.4029	rs2602429	T	C	0.0746844	0.0156194	11690	1.73987e-06	22.8589
class.Verrucomicrobiae.id.4029	rs4242783	A	G	0.0689292	0.0147693	11690	3.05538e-06	21.7777
class.Verrucomicrobiae.id.4029	rs4936098	G	A	0.0648843	0.0135928	11858	1.81119e-06	22.7817
class.Verrucomicrobiae.id.4029	rs74542928	C	T	0.112164	0.0236422	11216	2.09314e-06	22.5036
class.Verrucomicrobiae.id.4029	rs9349825	G	A	-0.0704036	0.0147128	11858	1.70821e-06	22.8942
family.Acidaminococcaceae.id.2166	rs262812	C	T	-0.065675	0.0142257	12099	3.89968e-06	21.31
family.Acidaminococcaceae.id.2166	rs2933324	G	A	-0.0662557	0.0140257	12525	2.3137e-06	22.3116
family.Acidaminococcaceae.id.2166	rs6427992	C	G	-0.0595857	0.01296	12527	4.27288e-06	21.135
family.Acidaminococcaceae.id.2166	rs6589457	G	A	0.165911	0.0349516	7386	2.06581e-06	22.5267
family.Acidaminococcaceae.id.2166	rs6923842	C	T	-0.0796106	0.0169192	11904	2.53457e-06	22.1364
family.Actinomycetaceae.id.421	rs2889192	T	G	0.0887537	0.0195009	7710	5.33223e-06	20.7087
family.Actinomycetaceae.id.421	rs35011108	G	A	0.241826	0.0503796	3630	1.58599e-06	23.0281
family.Alcaligenaceae.id.2875	rs112159068	T	A	0.131484	0.0281089	11656	2.90154e-06	21.8768
family.Alcaligenaceae.id.2875	rs17000015	T	A	-0.0609257	0.0125363	16377	1.17421e-06	23.6161
family.Alcaligenaceae.id.2875	rs2367850	C	G	0.0629104	0.0131712	16377	1.78495e-06	22.8108
family.Alcaligenaceae.id.2875	rs4033856	T	C	0.081834	0.0168931	15623	1.27108e-06	23.4635
family.Alcaligenaceae.id.2875	rs62191117	G	A	0.0684302	0.0133636	16688	3.04497e-07	26.2178
family.Alcaligenaceae.id.2875	rs62395635	C	T	0.110583	0.0238514	14802	3.54666e-06	21.4926
family.Alcaligenaceae.id.2875	rs67737557	G	C	0.0738409	0.0151678	15876	1.12577e-06	23.6971
family.Alcaligenaceae.id.2875	rs6969323	C	A	-0.0593564	0.0129137	16810	4.29839e-06	21.1244
family.Alcaligenaceae.id.2875	rs7302582	C	G	-0.106817	0.023298	15113	4.54445e-06	21.0175
family.Alcaligenaceae.id.2875	rs7638039	C	T	0.0603335	0.0127779	16791	2.33867e-06	22.2919
family.Alcaligenaceae.id.2875	rs9537886	C	A	-0.0570888	0.0110683	16807	2.49749e-07	26.6007
family.Alcaligenaceae.id.2875	rs9964679	G	A	0.0537051	0.0116008	16810	3.6668e-06	21.429
family.Bacteroidaceae.id.917	rs11585893	G	A	-0.0740746	0.0147633	17821	5.2356e-07	25.1722
family.Bacteroidaceae.id.917	rs17619981	G	T	0.0880978	0.0187002	15801	2.46434e-06	22.1913
family.Bacteroidaceae.id.917	rs28757219	A	T	0.0818398	0.0170319	14833	1.54674e-06	23.0859
family.Bacteroidaceae.id.917	rs495004	G	C	-0.0607475	0.0129865	17707	2.9007e-06	21.8787
family.Bacteroidaceae.id.917	rs66474973	T	G	0.0812515	0.0164479	17405	7.81489e-07	24.4001
family.Bacteroidaceae.id.917	rs6795673	T	C	0.0538565	0.0105251	18301	3.1052e-07	26.1803
family.Bacteroidaceae.id.917	rs9507307	T	C	0.0604456	0.0129128	18184	2.85389e-06	21.91
family.BacteroidalesS24.7group.id.11173	rs12748533	T	G	-0.0821108	0.0172701	7948	1.9892e-06	22.5998
family.BacteroidalesS24.7group.id.11173	rs17043770	A	G	-0.176886	0.0344092	5208	2.73797e-07	26.4161
family.BacteroidalesS24.7group.id.11173	rs689695	A	C	0.0814578	0.0167057	7954	1.08229e-06	23.7699
family.BacteroidalesS24.7group.id.11173	rs738193	C	T	0.0847328	0.0165856	7778	3.24178e-07	26.0933
family.BacteroidalesS24.7group.id.11173	rs941000	T	C	0.0850266	0.0163382	7778	1.94891e-07	27.0762
family.Bifidobacteriaceae.id.433	rs10841473	C	G	-0.0613031	0.0128844	14914	1.95601e-06	22.6347
family.Bifidobacteriaceae.id.433	rs13020688	A	G	0.0584045	0.0122081	14795	1.71788e-06	22.8841
family.Bifidobacteriaceae.id.433	rs182549	T	C	0.11707	0.0126703	14915	2.47237e-20	85.3602
family.Bifidobacteriaceae.id.433	rs1961273	T	C	0.0688125	0.0131699	14915	1.74176e-07	27.2967
family.Bifidobacteriaceae.id.433	rs4567981	A	T	0.0577763	0.0117388	14795	8.57486e-07	24.2209
family.Bifidobacteriaceae.id.433	rs4957061	C	T	0.0569873	0.0116907	14795	1.09047e-06	23.7582
family.Bifidobacteriaceae.id.433	rs7322849	C	T	0.110676	0.0200996	14915	3.66295e-08	30.3161
family.Bifidobacteriaceae.id.433	rs73797465	G	T	-0.0942612	0.0208421	14795	6.10764e-06	20.4514
family.Bifidobacteriaceae.id.433	rs7588568	C	A	-0.060716	0.0130605	14913	3.33838e-06	21.6086
family.Bifidobacteriaceae.id.433	rs76671854	G	C	-0.0892981	0.0183177	13923	1.08827e-06	23.7619
family.Bifidobacteriaceae.id.433	rs857444	T	C	0.0553965	0.0120669	14914	4.41618e-06	21.0723
family.Christensenellaceae.id.1866	rs5763231	T	C	-0.0682036	0.0149492	16183	5.05817e-06	20.8126
family.Christensenellaceae.id.1866	rs62573205	A	G	-0.0654804	0.0133503	16838	9.35275e-07	24.0541
family.Christensenellaceae.id.1866	rs892686	G	A	0.0506107	0.0109651	16847	3.91902e-06	21.3015
family.Clostridiaceae1.id.1869	rs12341505	A	G	0.0814503	0.0179338	14250	5.57987e-06	20.6243
family.Clostridiaceae1.id.1869	rs2795528	A	G	-0.180969	0.0390911	6411	3.66695e-06	21.4248
family.ClostridialesvadinBB60group.id.11286	rs118104867	T	C	0.214464	0.0455098	4095	2.4472e-06	22.1966
family.ClostridialesvadinBB60group.id.11286	rs13409132	G	A	-0.165419	0.0352154	5913	2.6358e-06	22.0575
family.ClostridialesvadinBB60group.id.11286	rs2191834	T	G	0.0746375	0.0159136	10511	2.72982e-06	21.9935
family.ClostridialesvadinBB60group.id.11286	rs28691777	T	C	0.137134	0.0266996	10199	2.80398e-07	26.375
family.ClostridialesvadinBB60group.id.11286	rs55682560	T	C	-0.131519	0.0261319	9183	4.83085e-07	25.3247
family.ClostridialesvadinBB60group.id.11286	rs6588624	A	G	-0.0662317	0.0138147	10512	1.63241e-06	22.981
family.ClostridialesvadinBB60group.id.11286	rs66714985	C	A	0.116908	0.0252447	10512	3.63927e-06	21.442
family.ClostridialesvadinBB60group.id.11286	rs7226487	G	A	-0.0643682	0.0138701	10505	3.47102e-06	21.5327
family.ClostridialesvadinBB60group.id.11286	rs7538034	G	T	-0.078598	0.0165982	10420	2.18706e-06	22.419
family.ClostridialesvadinBB60group.id.11286	rs7725895	G	A	-0.116224	0.0240367	10512	1.32972e-06	23.3753
family.ClostridialesvadinBB60group.id.11286	rs9979874	C	G	-0.0738925	0.0150911	10506	9.76016e-07	23.9703
family.Coriobacteriaceae.id.811	rs11250875	C	T	0.06075	0.0130939	17690	3.49138e-06	21.5232
family.Coriobacteriaceae.id.811	rs1816223	G	A	-0.0586265	0.0129006	17688	5.50697e-06	20.65
family.Coriobacteriaceae.id.811	rs240104	C	T	-0.0603429	0.0126849	17577	1.96432e-06	22.6271
family.Coriobacteriaceae.id.811	rs34739816	T	G	0.0965017	0.0207666	16593	3.36847e-06	21.5917
family.Coriobacteriaceae.id.811	rs719099	G	A	0.0778402	0.0155815	17687	5.86301e-07	24.954
family.Coriobacteriaceae.id.811	rs80046645	G	C	0.25584	0.0561995	3204	5.30506e-06	20.7109
family.Defluviitaleaceae.id.1924	rs112893842	C	T	0.110761	0.0232545	8203	1.90728e-06	22.6807
family.Defluviitaleaceae.id.1924	rs1582238	C	T	0.0801923	0.0167061	8002	1.58522e-06	23.036
family.Defluviitaleaceae.id.1924	rs17051335	T	C	-0.134314	0.0292201	8031	4.29426e-06	21.1235
family.Defluviitaleaceae.id.1924	rs2357086	C	T	-0.111566	0.0218162	8194	3.15555e-07	26.1457
family.Defluviitaleaceae.id.1924	rs4677103	G	A	0.0977203	0.0197033	8002	7.06383e-07	24.5915
family.Defluviitaleaceae.id.1924	rs55658617	C	T	0.177314	0.0361844	6676	9.56959e-07	24.0056
family.Defluviitaleaceae.id.1924	rs9608282	G	T	0.139014	0.0299429	7736	3.44e-06	21.5484
family.Defluviitaleaceae.id.1924	rs9725395	G	A	-0.138357	0.0295185	8031	2.77083e-06	21.9636
family.Desulfovibrionaceae.id.3169	rs112381107	T	C	0.211435	0.0456962	4455	3.7103e-06	21.3994
family.Desulfovibrionaceae.id.3169	rs11599763	C	T	-0.0555931	0.0117493	15142	2.22769e-06	22.385
family.Desulfovibrionaceae.id.3169	rs16851319	C	G	-0.0732697	0.0150964	15128	1.21324e-06	23.553
family.Desulfovibrionaceae.id.3169	rs17791387	G	A	-0.0729251	0.0154381	15045	2.31567e-06	22.3106
family.Desulfovibrionaceae.id.3169	rs2692012	G	A	0.114231	0.0253568	13080	6.63952e-06	20.2913
family.Desulfovibrionaceae.id.3169	rs2838334	A	G	0.0571419	0.012423	15142	4.23117e-06	21.1544
family.Desulfovibrionaceae.id.3169	rs4506934	T	C	-0.0943381	0.020138	15035	2.80533e-06	21.9424
family.Desulfovibrionaceae.id.3169	rs6058181	T	C	0.0834742	0.0166111	15074	5.02875e-07	25.2494
family.Desulfovibrionaceae.id.3169	rs9928243	A	C	-0.0541732	0.0117819	15141	4.26549e-06	21.1389
family.Enterobacteriaceae.id.3469	rs111229068	T	A	0.110561	0.0241719	12350	4.78626e-06	20.9176
family.Enterobacteriaceae.id.3469	rs2374343	G	C	0.0584029	0.0126351	13576	3.79567e-06	21.3622
family.Enterobacteriaceae.id.3469	rs6092361	G	A	0.060255	0.0129095	13518	3.04883e-06	21.7824
family.Enterobacteriaceae.id.3469	rs78143293	G	A	-0.0848521	0.0170415	13572	6.38673e-07	24.7882
family.Erysipelotrichaceae.id.2149	rs10781552	T	C	-0.0552212	0.0116074	17789	1.96096e-06	22.6304
family.Erysipelotrichaceae.id.2149	rs17530232	G	A	0.10305	0.0224648	16622	4.49263e-06	21.0397
family.Erysipelotrichaceae.id.2149	rs2300774	A	G	0.0524152	0.0106784	18216	9.17591e-07	24.0911
family.Erysipelotrichaceae.id.2149	rs35161940	C	T	-0.0806041	0.0167641	18213	1.52343e-06	23.1157
family.Erysipelotrichaceae.id.2149	rs4078432	T	C	-0.0608929	0.0133764	17789	5.30679e-06	20.7209
family.Erysipelotrichaceae.id.2149	rs62504403	T	C	0.0681159	0.0127883	16981	1.00175e-07	28.3673
family.Erysipelotrichaceae.id.2149	rs7234058	C	T	-0.0945759	0.0194091	16874	1.10047e-06	23.741
family.Erysipelotrichaceae.id.2149	rs8003149	T	C	0.0538798	0.0116888	18213	4.03592e-06	21.2454
family.FamilyXI.id.1936	rs10759623	T	C	-0.162115	0.032151	3156	4.59993e-07	25.4086
family.FamilyXI.id.1936	rs11547158	G	A	-0.177599	0.0372795	3133	1.89796e-06	22.6812
family.FamilyXI.id.1936	rs17379710	C	T	-0.116383	0.0252125	3156	3.91011e-06	21.2949
family.FamilyXI.id.1936	rs2155352	G	A	-0.150538	0.0302319	3150	6.37729e-07	24.7789
family.FamilyXI.id.1936	rs3733511	G	A	0.128253	0.0274718	3156	3.03331e-06	21.7816
family.FamilyXI.id.1936	rs488164	G	T	0.117998	0.025516	3149	3.75572e-06	21.3721
family.FamilyXI.id.1936	rs697771	G	A	-0.117677	0.0251491	3152	2.88031e-06	21.8808
family.FamilyXIII.id.1957	rs118170811	G	A	0.151619	0.0317112	9645	1.74212e-06	22.8556
family.FamilyXIII.id.1957	rs12643275	T	A	-0.0550907	0.0116474	16269	2.2466e-06	22.369
family.FamilyXIII.id.1957	rs1999289	T	A	-0.0637366	0.013927	16269	4.72849e-06	20.9417
family.FamilyXIII.id.1957	rs3098182	T	G	0.0508511	0.011014	16731	3.89447e-06	21.3136
family.FamilyXIII.id.1957	rs482905	T	G	0.0596528	0.012717	16737	2.7216e-06	22.0008
family.FamilyXIII.id.1957	rs6501525	G	A	0.0561559	0.0115587	16269	1.1839e-06	23.6003
family.FamilyXIII.id.1957	rs6797051	T	C	-0.0805984	0.0171364	16737	2.55934e-06	22.1188
family.FamilyXIII.id.1957	rs7076829	A	T	-0.0516394	0.0112313	16269	4.26941e-06	21.1373
family.FamilyXIII.id.1957	rs7514702	C	T	-0.0663236	0.0141626	16737	2.82672e-06	21.9281
family.Lachnospiraceae.id.1987	rs11139361	C	T	0.0494463	0.0110503	18333	7.65393e-06	20.0202
family.Lachnospiraceae.id.1987	rs112040820	G	A	0.0549584	0.0117086	17512	2.68097e-06	22.0298
family.Lachnospiraceae.id.1987	rs11755180	G	C	-0.049227	0.0104894	18333	2.69197e-06	22.0221
family.Lachnospiraceae.id.1987	rs11979110	C	T	-0.0500924	0.0105069	18339	1.86446e-06	22.7274
family.Lachnospiraceae.id.1987	rs2159863	G	A	-0.0585831	0.0128742	18340	5.35383e-06	20.7041
family.Lachnospiraceae.id.1987	rs35524804	C	T	-0.0607481	0.0125216	17859	1.22547e-06	23.5342
family.Lachnospiraceae.id.1987	rs79086868	C	T	0.0776723	0.0164472	17522	2.32943e-06	22.2996
family.Lachnospiraceae.id.1987	rs9929145	A	G	-0.125721	0.0245233	15866	2.95032e-07	26.2786
family.Lactobacillaceae.id.1836	rs11674854	T	C	-0.0830224	0.0175267	6750	2.17015e-06	22.4315
family.Lactobacillaceae.id.1836	rs16861661	A	G	-0.193287	0.0379293	5385	3.46925e-07	25.9595
family.Lactobacillaceae.id.1836	rs328312	A	T	0.082529	0.0168225	7051	9.30131e-07	24.0608
family.Lactobacillaceae.id.1836	rs6092149	T	A	-0.0825646	0.0170282	7006	1.2428e-06	23.5031
family.Lactobacillaceae.id.1836	rs7399658	A	G	-0.10457	0.0220312	6707	2.0703e-06	22.522
family.Lactobacillaceae.id.1836	rs768253	G	T	-0.0792344	0.0170604	7059	3.41163e-06	21.5638
family.Lactobacillaceae.id.1836	rs921925	C	A	0.0999419	0.0201687	7053	7.22222e-07	24.5479
family.Methanobacteriaceae.id.121	rs10202904	G	T	-0.121754	0.0235357	3695	2.30182e-07	26.747
family.Methanobacteriaceae.id.121	rs62241835	T	G	-0.203385	0.0417931	3383	1.13601e-06	23.6687
family.Methanobacteriaceae.id.121	rs73457410	G	A	0.21534	0.0436695	3498	8.17584e-07	24.3021
family.Methanobacteriaceae.id.121	rs894996	A	C	0.216999	0.0449076	3582	1.35081e-06	23.3364
family.Oxalobacteraceae.id.2966	rs111966731	C	T	0.204031	0.0445746	4387	4.71032e-06	20.9421
family.Oxalobacteraceae.id.2966	rs11246212	C	T	0.13607	0.0291797	5130	3.11342e-06	21.7369
family.Oxalobacteraceae.id.2966	rs1569853	C	T	-0.140043	0.0281704	4997	6.65138e-07	24.7037
family.Oxalobacteraceae.id.2966	rs4428215	A	G	0.12561	0.0230053	5167	4.76023e-08	29.8005
family.Oxalobacteraceae.id.2966	rs6000536	T	C	-0.118383	0.0241355	5166	9.3462e-07	24.049
family.Oxalobacteraceae.id.2966	rs736744	T	C	0.105642	0.0200648	5167	1.40157e-07	27.7099
family.Oxalobacteraceae.id.2966	rs934049	A	G	0.109751	0.0238636	4951	4.24292e-06	21.1433
family.Pasteurellaceae.id.3689	rs10840326	G	C	-0.0717634	0.0149229	9154	1.51737e-06	23.1208
family.Pasteurellaceae.id.3689	rs10965428	A	C	-0.119902	0.0258219	8873	3.4268e-06	21.5565
family.Pasteurellaceae.id.3689	rs12191680	G	C	0.102214	0.0197189	9408	2.17733e-07	26.8632
family.Pasteurellaceae.id.3689	rs35510	G	A	0.122729	0.0264958	8671	3.62105e-06	21.4507
family.Pasteurellaceae.id.3689	rs4822728	C	T	0.0685479	0.0149032	9412	4.23444e-06	21.1512
family.Pasteurellaceae.id.3689	rs6092684	T	A	0.0684647	0.014674	9366	3.07538e-06	21.7643
family.Pasteurellaceae.id.3689	rs72756943	A	G	0.13988	0.0303029	8020	3.91089e-06	21.3027
family.Pasteurellaceae.id.3689	rs76022354	T	C	0.24289	0.0500406	3692	1.21086e-06	23.5471
family.Pasteurellaceae.id.3689	rs78909003	C	T	-0.241159	0.0498372	3638	1.30532e-06	23.4025
family.Pasteurellaceae.id.3689	rs9382510	T	C	-0.0881865	0.0169965	9410	2.11976e-07	26.915
family.Peptococcaceae.id.2024	rs117452796	G	A	-0.257982	0.0549569	3161	2.67567e-06	22.0222
family.Peptococcaceae.id.2024	rs12634826	G	T	-0.0739885	0.0150931	10381	9.48014e-07	24.0263
family.Peptococcaceae.id.2024	rs12992764	G	T	0.0684213	0.0141137	10444	1.24798e-06	23.4973
family.Peptococcaceae.id.2024	rs150600492	C	A	0.135774	0.0289757	9761	2.78881e-06	21.9521
family.Peptococcaceae.id.2024	rs35703006	T	G	0.0812655	0.0164355	10715	7.63399e-07	24.4435
family.Peptococcaceae.id.2024	rs4990837	G	A	0.0910387	0.0185869	10718	9.68215e-07	23.9858
family.Peptococcaceae.id.2024	rs75430375	T	C	-0.147941	0.0317498	8375	3.16856e-06	21.7065
family.Peptococcaceae.id.2024	rs75898026	G	A	-0.0821779	0.0173541	10444	2.18683e-06	22.4192
family.Peptostreptococcaceae.id.2042	rs10805326	A	G	0.0566637	0.012276	16061	3.91551e-06	21.3031
family.Peptostreptococcaceae.id.2042	rs117020988	T	C	0.182411	0.0372126	6831	9.49329e-07	24.0212
family.Peptostreptococcaceae.id.2042	rs12377846	A	C	-0.252	0.0511627	3736	8.41581e-07	24.2473
family.Peptostreptococcaceae.id.2042	rs1520207	T	C	0.0525658	0.0112476	16057	2.96092e-06	21.839
family.Peptostreptococcaceae.id.2042	rs2644627	G	C	-0.0558506	0.011224	16059	6.49138e-07	24.7574
family.Peptostreptococcaceae.id.2042	rs4692811	T	C	0.0642075	0.0126913	16061	4.21053e-07	25.5922
family.Peptostreptococcaceae.id.2042	rs59987323	T	C	-0.0537078	0.011443	15584	2.68562e-06	22.0262
family.Peptostreptococcaceae.id.2042	rs61841503	A	G	0.0919658	0.0161331	15333	1.19496e-08	32.4908
family.Peptostreptococcaceae.id.2042	rs75819860	A	T	0.126264	0.0268383	11697	2.54345e-06	22.1296
family.Peptostreptococcaceae.id.2042	rs76982728	C	T	0.124203	0.0266923	11185	3.26936e-06	21.6477
family.Peptostreptococcaceae.id.2042	rs9573934	T	C	-0.0687189	0.0141533	16059	1.20184e-06	23.5713
family.Porphyromonadaceae.id.943	rs10119172	G	C	-0.0737324	0.014259	18022	2.32919e-07	26.7357
family.Porphyromonadaceae.id.943	rs10858364	T	G	0.055316	0.012085	18028	4.71136e-06	20.9489
family.Porphyromonadaceae.id.943	rs12486680	C	A	0.0984639	0.0218573	17108	6.64191e-06	20.2913
family.Porphyromonadaceae.id.943	rs17065783	G	A	-0.059133	0.0122235	18028	1.31388e-06	23.4002
family.Porphyromonadaceae.id.943	rs3111851	G	C	0.0581896	0.0121147	18024	1.56136e-06	23.0683
family.Porphyromonadaceae.id.943	rs6953849	G	A	0.0718149	0.0150724	18028	1.89179e-06	22.6994
family.Prevotellaceae.id.960	rs12118202	C	T	-0.0751986	0.0147265	14869	3.28459e-07	26.0712
family.Prevotellaceae.id.960	rs148376875	G	T	0.084515	0.0179163	14289	2.39103e-06	22.2489
family.Prevotellaceae.id.960	rs2206482	G	T	-0.0569105	0.0117486	14808	1.27248e-06	23.4612
family.Prevotellaceae.id.960	rs3860225	G	A	0.083936	0.0167936	14871	5.78996e-07	24.9776
family.Prevotellaceae.id.960	rs4493272	C	T	-0.0604992	0.0118027	14867	2.96173e-07	26.271
family.Prevotellaceae.id.960	rs4685827	C	T	-0.0679529	0.0145407	14867	2.96421e-06	21.8366
family.Prevotellaceae.id.960	rs912860	A	G	-0.229046	0.0483124	3479	2.12732e-06	22.4636
family.Prevotellaceae.id.960	rs9586501	A	G	0.0592681	0.0127329	14868	3.24437e-06	21.6634
family.Prevotellaceae.id.960	rs9958960	A	G	-0.0914807	0.0173611	14061	1.3696e-07	27.7614
family.Rhodospirillaceae.id.2717	rs11591293	T	G	0.0743184	0.0158724	8500	2.83761e-06	21.9182
family.Rhodospirillaceae.id.2717	rs1549633	C	A	0.0999312	0.0218634	8010	4.86074e-06	20.8862
family.Rhodospirillaceae.id.2717	rs16855101	T	C	0.119409	0.0250471	8499	1.86651e-06	22.7224
family.Rhodospirillaceae.id.2717	rs3754624	T	C	0.0971389	0.0200064	8496	1.20149e-06	23.5693
family.Rhodospirillaceae.id.2717	rs4278423	C	T	0.107529	0.0235725	8501	5.07553e-06	20.8037
family.Rhodospirillaceae.id.2717	rs55876211	T	C	-0.0911851	0.0196395	8494	3.43491e-06	21.5518
family.Rhodospirillaceae.id.2717	rs9813022	G	A	-0.0842444	0.0163583	8498	2.6057e-07	26.5156
family.Rikenellaceae.id.967	rs1939881	A	G	-0.105589	0.0206213	17434	3.05e-07	26.2157
family.Rikenellaceae.id.967	rs2833282	A	G	0.0711137	0.0156966	17680	5.88e-06	20.5232
family.Rikenellaceae.id.967	rs4264350	C	T	-0.0526393	0.0108555	17668	1.24e-06	23.5111
family.Rikenellaceae.id.967	rs67281112	C	G	0.0635814	0.0137451	17199	3.73e-06	21.395
family.Rikenellaceae.id.967	rs67705352	G	T	-0.0549688	0.0110534	17676	6.59e-07	24.7282
family.Rikenellaceae.id.967	rs6837275	G	A	0.0570355	0.011887	17199	1.6e-06	23.0195
family.Rikenellaceae.id.967	rs74474130	G	T	0.137747	0.0295688	11055	3.18e-06	21.6981
family.Rikenellaceae.id.967	rs77885767	T	C	-0.156209	0.0336482	8478	3.44e-06	21.5471
family.Rikenellaceae.id.967	rs8130320	G	A	-0.048924	0.0106843	17680	4.67e-06	20.9652
family.Rikenellaceae.id.967	rs9578457	A	G	-0.141478	0.0315848	9400	7.49e-06	20.0601
family.Rikenellaceae.id.967	rs9603208	T	G	0.0821173	0.0159596	17680	2.67e-07	26.4715
family.Ruminococcaceae.id.2050	rs117677831	A	G	0.0984657	0.0188897	15835	1.86153e-07	27.1684
family.Ruminococcaceae.id.2050	rs1612733	C	T	0.108708	0.0238006	15016	4.93662e-06	20.8589
family.Ruminococcaceae.id.2050	rs17376049	C	T	0.0848534	0.0172114	18333	8.21987e-07	24.303
family.Ruminococcaceae.id.2050	rs2113833	C	T	0.169146	0.0355009	4140	1.89269e-06	22.69
family.Ruminococcaceae.id.2050	rs56199908	C	T	-0.199327	0.0410444	5618	1.19559e-06	23.5759
family.Streptococcaceae.id.1850	rs10028567	T	C	-0.0934027	0.0190343	16549	9.25e-07	24.0763
family.Streptococcaceae.id.1850	rs11110281	C	T	-0.130554	0.0225943	15316	7.55e-09	33.3831
family.Streptococcaceae.id.1850	rs2370083	T	G	-0.0842751	0.0184509	16516	4.94e-06	20.8597
family.Streptococcaceae.id.1850	rs35344081	A	G	0.0609349	0.0129703	16624	2.63e-06	22.0688
family.Streptococcaceae.id.1850	rs395407	C	G	-0.0826855	0.0172536	16088	1.65e-06	22.9639
family.Streptococcaceae.id.1850	rs4968759	G	A	-0.0544035	0.0111271	16624	1.01e-06	23.9021
family.Streptococcaceae.id.1850	rs72739637	G	A	0.0927983	0.0192021	15111	1.35e-06	23.3521
family.Streptococcaceae.id.1850	rs76717940	A	T	0.150606	0.0334079	7720	6.54e-06	20.3175
family.Streptococcaceae.id.1850	rs77558518	G	A	-0.104239	0.022806	15161	4.86e-06	20.8882
family.Streptococcaceae.id.1850	rs9903102	A	C	-0.0693015	0.0154096	16623	6.88e-06	20.2232
family.Veillonellaceae.id.2172	rs111810795	T	C	-0.0867108	0.0180573	15605	1.57112e-06	23.056
family.Veillonellaceae.id.2172	rs12186441	A	G	0.208096	0.0453999	5236	4.56994e-06	21.0015
family.Veillonellaceae.id.2172	rs12668619	G	A	0.055301	0.0117654	15971	2.59759e-06	22.0902
family.Veillonellaceae.id.2172	rs12741784	T	C	-0.0621452	0.0119266	15867	1.88194e-07	27.1473
family.Veillonellaceae.id.2172	rs1442060	A	G	-0.0514024	0.0112125	15976	4.55279e-06	21.0141
family.Veillonellaceae.id.2172	rs2175069	G	A	-0.0526752	0.0114886	15976	4.54025e-06	21.0194
family.Veillonellaceae.id.2172	rs4461038	G	A	-0.0554965	0.0119467	15973	3.39538e-06	21.5764
family.Veillonellaceae.id.2172	rs4797169	C	T	0.0587799	0.0128297	15974	4.61522e-06	20.9881
family.Veillonellaceae.id.2172	rs79535861	C	A	0.100666	0.0207016	15061	1.15775e-06	23.643
family.Verrucomicrobiaceae.id.4036	rs11184341	C	G	0.0655301	0.014223	11864	4.079e-06	21.2238
family.Verrucomicrobiaceae.id.4036	rs111862613	C	T	0.0907065	0.0196746	11621	4.02034e-06	21.2515
family.Verrucomicrobiaceae.id.4036	rs117107102	G	A	0.204683	0.0431573	4975	2.10865e-06	22.4844
family.Verrucomicrobiaceae.id.4036	rs11729256	C	T	0.0749798	0.0150177	11861	5.95195e-07	24.9235
family.Verrucomicrobiaceae.id.4036	rs12908520	A	G	0.0619104	0.0130946	11863	2.2682e-06	22.3496
family.Verrucomicrobiaceae.id.4036	rs2602429	T	C	0.0745516	0.0156195	11690	1.81515e-06	22.7775
family.Verrucomicrobiaceae.id.4036	rs4242783	A	G	0.0687992	0.0147694	11690	3.18926e-06	21.6955
family.Verrucomicrobiaceae.id.4036	rs4936098	G	A	0.0648691	0.0135928	11858	1.82124e-06	22.7711
family.Verrucomicrobiaceae.id.4036	rs74542928	C	T	0.112124	0.0236422	11216	2.11056e-06	22.4877
family.Verrucomicrobiaceae.id.4036	rs9349825	G	A	-0.0704354	0.0147128	11858	1.68992e-06	22.9149
family.Victivallaceae.id.2255	rs11671100	C	A	-0.160034	0.0349472	3331	4.66499e-06	20.9575
family.Victivallaceae.id.2255	rs2546105	T	A	0.126643	0.0257111	3917	8.40834e-07	24.2496
family.Victivallaceae.id.2255	rs2944282	C	T	-0.124197	0.0257026	3555	1.35121e-06	23.3358
family.Victivallaceae.id.2255	rs34296005	A	T	0.127903	0.0257466	3915	6.77289e-07	24.6661
family.Victivallaceae.id.2255	rs4396289	T	C	-0.152918	0.0288525	3913	1.15821e-07	28.0753
family.Victivallaceae.id.2255	rs61702987	C	T	0.145501	0.0300007	3906	1.23508e-06	23.5097
family.Victivallaceae.id.2255	rs62570196	T	C	-0.246101	0.0483077	3091	3.49746e-07	25.9367
family.Victivallaceae.id.2255	rs6545794	G	A	-0.197786	0.0410495	3916	1.44846e-06	23.2034
family.Victivallaceae.id.2255	rs67832247	T	C	-0.123489	0.0266695	3555	3.6505e-06	21.4281
family.Victivallaceae.id.2255	rs7077363	A	G	0.148942	0.0318366	3912	2.89224e-06	21.8756
genus..Clostridiuminnocuumgroup.id.14397	rs1942371	A	G	-0.157938	0.034187	3971	3.84053e-06	21.3321
genus..Clostridiuminnocuumgroup.id.14397	rs1948423	A	T	-0.108859	0.023425	4165	3.36571e-06	21.5855
genus..Clostridiuminnocuumgroup.id.14397	rs6890185	C	T	0.113424	0.0233137	4166	1.14398e-06	23.6579
genus..Eubacteriumbrachygroup.id.11296	rs2913110	T	C	0.105143	0.022942	4001	4.58352e-06	20.9934
genus..Eubacteriumbrachygroup.id.11296	rs4862235	A	G	0.104806	0.0225751	4000	3.44128e-06	21.5425
genus..Eubacteriumbrachygroup.id.11296	rs55932844	G	A	-0.170705	0.0361023	3999	2.26331e-06	22.3463
genus..Eubacteriumbrachygroup.id.11296	rs62348779	C	T	-0.201481	0.043286	3827	3.24556e-06	21.6543
genus..Eubacteriumbrachygroup.id.11296	rs9613196	A	T	-0.238718	0.0528561	3004	6.29045e-06	20.3841
genus..Eubacteriumcoprostanoligenesgroup.id.11375	rs11808093	C	T	0.0790287	0.0173724	16660	5.38771e-06	20.6918
genus..Eubacteriumcoprostanoligenesgroup.id.11375	rs12906958	T	C	-0.0533159	0.0115935	17380	4.24959e-06	21.1464
genus..Eubacteriumcoprostanoligenesgroup.id.11375	rs17159861	T	C	0.0962228	0.0168388	17380	1.10132e-08	32.6499
genus..Eubacteriumcoprostanoligenesgroup.id.11375	rs4076415	G	T	0.0515152	0.0110294	16960	3.00172e-06	21.8129
genus..Eubacteriumcoprostanoligenesgroup.id.11375	rs6762473	A	C	0.0521584	0.0112353	17377	3.4441e-06	21.5493
genus..Eubacteriumcoprostanoligenesgroup.id.11375	rs73109678	A	G	-0.0796956	0.0172275	17379	3.72679e-06	21.398
genus..Eubacteriumcoprostanoligenesgroup.id.11375	rs76898927	A	G	0.123055	0.0266375	12197	3.84448e-06	21.3374
genus..Eubacteriumcoprostanoligenesgroup.id.11375	rs9648214	C	T	-0.0828719	0.016431	17379	4.56764e-07	25.4354
genus..Eubacteriumeligensgroup.id.14372	rs265534	G	T	-0.0563756	0.0120127	14776	2.69237e-06	22.0212
genus..Eubacteriumeligensgroup.id.14372	rs4583233	C	A	0.0670205	0.0128122	14327	1.68597e-07	27.3595
genus..Eubacteriumeligensgroup.id.14372	rs6923695	G	T	0.103268	0.0229524	12891	6.82105e-06	20.2396
genus..Eubacteriumeligensgroup.id.14372	rs72839198	G	C	0.155659	0.0375612	4926	3.4109e-05	17.1669
genus..Eubacteriumeligensgroup.id.14372	rs74606150	G	C	-0.196454	0.042565	5381	3.92371e-06	21.2938
genus..Eubacteriumfissicatenagroup.id.14373	rs11876297	C	T	0.131469	0.0281712	3396	3.05925e-06	21.7662
genus..Eubacteriumfissicatenagroup.id.14373	rs151257695	G	A	0.20951	0.0454847	3587	4.10179e-06	21.2049
genus..Eubacteriumfissicatenagroup.id.14373	rs2733072	A	G	0.109644	0.0228306	3833	1.56687e-06	23.0521
genus..Eubacteriumfissicatenagroup.id.14373	rs3771393	T	C	0.130842	0.0266671	3792	9.27125e-07	24.0611
genus..Eubacteriumfissicatenagroup.id.14373	rs7104872	A	G	0.138612	0.0291906	3829	2.04917e-06	22.5366
genus..Eubacteriumhalliigroup.id.11338	rs10798999	T	C	0.0601661	0.0126752	16561	2.06723e-06	22.5288
genus..Eubacteriumhalliigroup.id.11338	rs10808115	C	A	-0.0504747	0.0109922	16566	4.39337e-06	21.0825
genus..Eubacteriumhalliigroup.id.11338	rs13116360	C	T	0.154124	0.0297185	10323	2.14699e-07	26.8908
genus..Eubacteriumhalliigroup.id.11338	rs28584818	G	A	0.126115	0.0268627	11095	2.66861e-06	22.0372
genus..Eubacteriumhalliigroup.id.11338	rs60254196	G	A	-0.0522832	0.0111865	16238	2.95711e-06	21.8415
genus..Eubacteriumhalliigroup.id.11338	rs6550770	C	T	-0.198087	0.0443545	4279	7.96934e-06	19.9359
genus..Eubacteriumhalliigroup.id.11338	rs74018587	T	C	0.208943	0.043822	3039	1.86072e-06	22.7188
genus..Eubacteriumhalliigroup.id.11338	rs949971	G	T	-0.0540164	0.0116101	16566	3.27865e-06	21.6436
genus..Eubacteriumnodatumgroup.id.11297	rs34297067	G	A	-0.186907	0.0341475	3271	4.41215e-08	29.941
genus..Eubacteriumnodatumgroup.id.11297	rs61841040	T	G	0.160621	0.0341609	3295	2.57757e-06	22.0944
genus..Eubacteriumnodatumgroup.id.11297	rs77910827	T	C	0.201788	0.0413568	3271	1.06514e-06	23.7921
genus..Eubacteriumoxidoreducensgroup.id.11339	rs12423772	T	G	0.14098	0.0295029	5321	1.76605e-06	22.8255
genus..Eubacteriumoxidoreducensgroup.id.11339	rs2973294	T	G	0.0923559	0.0195439	5378	2.29474e-06	22.3227
genus..Eubacteriumoxidoreducensgroup.id.11339	rs34561138	A	G	0.216145	0.045992	4186	2.6063e-06	22.076
genus..Eubacteriumoxidoreducensgroup.id.11339	rs440215	T	C	0.0932766	0.0195294	5377	1.78624e-06	22.8038
genus..Eubacteriumrectalegroup.id.14374	rs10248854	A	C	-0.0527827	0.0113463	17348	3.28807e-06	21.6382
genus..Eubacteriumrectalegroup.id.14374	rs10797540	G	A	0.0503179	0.0108389	17350	3.44511e-06	21.5487
genus..Eubacteriumrectalegroup.id.14374	rs117151453	C	G	-0.113141	0.0243541	13908	3.39021e-06	21.5789
genus..Eubacteriumrectalegroup.id.14374	rs16960159	G	C	-0.156596	0.0336234	8334	3.203e-06	21.6857
genus..Eubacteriumrectalegroup.id.14374	rs314726	C	T	0.0528824	0.0109486	16966	1.36502e-06	23.3266
genus..Eubacteriumrectalegroup.id.14374	rs35398954	G	A	-0.0901402	0.0174602	16621	2.43523e-07	26.6494
genus..Eubacteriumruminantiumgroup.id.11340	rs10131724	C	A	-0.199832	0.0414577	5071	1.43452e-06	23.2247
genus..Eubacteriumruminantiumgroup.id.11340	rs139749	T	C	-0.0845439	0.0171791	7314	8.59577e-07	24.2129
genus..Eubacteriumruminantiumgroup.id.11340	rs16891896	A	G	-0.174787	0.0390573	4753	7.63588e-06	20.0185
genus..Eubacteriumruminantiumgroup.id.11340	rs17519472	T	C	0.107804	0.0233984	7710	4.07865e-06	21.222
genus..Eubacteriumruminantiumgroup.id.11340	rs2116427	G	A	0.0911461	0.0182353	7739	5.78295e-07	24.9768
genus..Eubacteriumruminantiumgroup.id.11340	rs2229917	G	A	0.153538	0.0323922	7050	2.13756e-06	22.4609
genus..Eubacteriumruminantiumgroup.id.11340	rs57340348	C	T	-0.0979429	0.0212166	7314	3.90574e-06	21.3047
genus..Eubacteriumruminantiumgroup.id.11340	rs606117	G	A	0.0833243	0.018056	7263	3.93527e-06	21.2903
genus..Eubacteriumruminantiumgroup.id.11340	rs7000472	G	A	-0.0762282	0.016523	7739	3.96031e-06	21.2785
genus..Eubacteriumruminantiumgroup.id.11340	rs72836424	T	C	-0.139825	0.030069	7314	3.31726e-06	21.6178
genus..Eubacteriumventriosumgroup.id.11341	rs11617697	G	A	-0.143349	0.0286241	11497	5.50068e-07	25.0754
genus..Eubacteriumventriosumgroup.id.11341	rs12964517	A	G	0.0587198	0.0123453	15289	1.97039e-06	22.6207
genus..Eubacteriumventriosumgroup.id.11341	rs16884680	T	G	-0.0906428	0.0191909	15289	2.3214e-06	22.3059
genus..Eubacteriumventriosumgroup.id.11341	rs3809430	C	T	-0.0548171	0.0118426	15287	3.67754e-06	21.4232
genus..Eubacteriumventriosumgroup.id.11341	rs57199565	C	T	0.0783394	0.0160257	14913	1.0168e-06	23.8929
genus..Eubacteriumventriosumgroup.id.11341	rs6048195	T	A	-0.0603594	0.011658	14839	2.24862e-07	26.803
genus..Eubacteriumventriosumgroup.id.11341	rs73615400	C	T	-0.0956303	0.0193428	15146	7.65416e-07	24.4398
genus..Eubacteriumventriosumgroup.id.11341	rs78250280	A	G	0.0749762	0.0164404	14835	5.10382e-06	20.7951
genus..Eubacteriumventriosumgroup.id.11341	rs876734	T	C	-0.0618696	0.0132532	14913	3.03748e-06	21.7898
genus..Eubacteriumxylanophilumgroup.id.14375	rs10140184	C	A	0.0576795	0.012599	12930	4.69215e-06	20.9558
genus..Eubacteriumxylanophilumgroup.id.14375	rs10917203	C	A	0.0612633	0.0130917	12930	2.87493e-06	21.8949
genus..Eubacteriumxylanophilumgroup.id.14375	rs112176119	T	C	-0.113455	0.0245762	12199	3.90307e-06	21.3084
genus..Eubacteriumxylanophilumgroup.id.14375	rs13239072	A	G	0.0687427	0.0142728	13307	1.46219e-06	23.1936
genus..Eubacteriumxylanophilumgroup.id.14375	rs17830032	A	G	-0.160597	0.0310515	9527	2.31629e-07	26.7437
genus..Eubacteriumxylanophilumgroup.id.14375	rs1999224	T	G	-0.0949051	0.0203503	13309	3.10757e-06	21.7457
genus..Eubacteriumxylanophilumgroup.id.14375	rs2213117	G	T	0.0877797	0.0189012	12878	3.41515e-06	21.5646
genus..Eubacteriumxylanophilumgroup.id.14375	rs79582700	G	C	-0.0951677	0.0199969	13256	1.94438e-06	22.6458
genus..Ruminococcusgauvreauiigroup.id.11342	rs10931481	A	G	0.0610096	0.0130484	13382	2.9306e-06	21.8582
genus..Ruminococcusgauvreauiigroup.id.11342	rs12539819	T	C	0.110654	0.0240684	11860	4.27654e-06	21.1332
genus..Ruminococcusgauvreauiigroup.id.11342	rs1391597	T	C	0.0590284	0.0124874	13382	2.27801e-06	22.3417
genus..Ruminococcusgauvreauiigroup.id.11342	rs2047242	G	A	-0.067603	0.0133738	13369	4.30629e-07	25.5481
genus..Ruminococcusgauvreauiigroup.id.11342	rs289410	A	G	-0.0654926	0.0139101	13380	2.49823e-06	22.1645
genus..Ruminococcusgauvreauiigroup.id.11342	rs71386687	G	T	0.121037	0.02386	11340	3.91996e-07	25.7288
genus..Ruminococcusgauvreauiigroup.id.11342	rs9870933	G	A	0.0621643	0.0126072	13382	8.18643e-07	24.3098
genus..Ruminococcusgnavusgroup.id.14376	rs12136548	T	C	0.0901946	0.0196476	6401	4.41929e-06	21.0672
genus..Ruminococcusgnavusgroup.id.14376	rs13163520	A	G	-0.127377	0.0233883	6326	5.14575e-08	29.6517
genus..Ruminococcusgnavusgroup.id.14376	rs2909242	A	C	-0.0909965	0.018351	6401	7.09801e-07	24.5807
genus..Ruminococcusgnavusgroup.id.14376	rs3124783	G	A	-0.11599	0.0249099	6401	3.21836e-06	21.675
genus..Ruminococcusgnavusgroup.id.14376	rs62167033	C	T	0.185289	0.0396295	5194	2.93196e-06	21.8522
genus..Ruminococcusgnavusgroup.id.14376	rs934940	C	A	-0.105045	0.0229588	6309	4.75404e-06	20.9273
genus..Ruminococcusgnavusgroup.id.14376	rs9872758	C	T	0.0849233	0.0176643	6398	1.5274e-06	23.106
genus..Ruminococcustorquesgroup.id.14377	rs10904297	G	A	-0.167804	0.0389812	3143	1.67e-05	18.5191
genus..Ruminococcustorquesgroup.id.14377	rs12434631	G	A	0.074697	0.0153401	17353	1.12e-06	23.7084
genus..Ruminococcustorquesgroup.id.14377	rs4073731	C	T	0.0651948	0.0142221	17793	4.56e-06	21.0111
genus..Ruminococcustorquesgroup.id.14377	rs73130967	T	A	0.0770375	0.0168264	17011	4.69e-06	20.9589
genus..Ruminococcustorquesgroup.id.14377	rs773123	A	T	0.0824005	0.0173862	17011	2.14e-06	22.4595
genus..Ruminococcustorquesgroup.id.14377	rs8080469	A	G	0.0490727	0.0107036	17798	4.55e-06	21.0169
genus.Actinomyces.id.423	rs34583783	T	G	0.126596	0.0268461	7468	2.40976e-06	22.2311
genus.Actinomyces.id.423	rs4146653	A	G	0.0985224	0.0214182	7468	4.22634e-06	21.1537
genus.Adlercreutzia.id.812	rs12522517	T	A	-0.104884	0.0234695	8187	7.85973e-06	19.9668
genus.Adlercreutzia.id.812	rs13231526	A	C	0.143237	0.0311654	8051	4.30634e-06	21.1182
genus.Adlercreutzia.id.812	rs2147798	G	C	0.0922959	0.0192121	8243	1.55492e-06	23.0732
genus.Adlercreutzia.id.812	rs34181676	T	G	-0.134998	0.028231	7929	1.73641e-06	22.8609
genus.Adlercreutzia.id.812	rs7680684	T	C	-0.083381	0.0168901	8243	7.94624e-07	24.3649
genus.Adlercreutzia.id.812	rs80078995	T	A	-0.11324	0.0232586	8243	1.12323e-06	23.6987
genus.Adlercreutzia.id.812	rs9490822	T	C	-0.0734512	0.0155789	8243	2.41962e-06	22.2238
genus.Akkermansia.id.4037	rs11184341	C	G	0.0655855	0.0142236	11863	4.00699e-06	21.2579
genus.Akkermansia.id.4037	rs111862613	C	T	0.0911199	0.0196748	11620	3.63381e-06	21.4452
genus.Akkermansia.id.4037	rs117107102	G	A	0.204406	0.0431629	4974	2.18309e-06	22.4178
genus.Akkermansia.id.4037	rs11729256	C	T	0.0750473	0.0150184	11860	5.82224e-07	24.966
genus.Akkermansia.id.4037	rs12908520	A	G	0.061772	0.0130954	11862	2.39252e-06	22.2471
genus.Akkermansia.id.4037	rs2602429	T	C	0.0745352	0.0156201	11689	1.82638e-06	22.7656
genus.Akkermansia.id.4037	rs4242783	A	G	0.0685454	0.0147701	11689	3.47009e-06	21.5336
genus.Akkermansia.id.4037	rs4936098	G	A	0.0649225	0.0135934	11857	1.78783e-06	22.8067
genus.Akkermansia.id.4037	rs74542928	C	T	0.112623	0.0236434	11215	1.90375e-06	22.6858
genus.Akkermansia.id.4037	rs9349825	G	A	-0.0703407	0.0147133	11857	1.74635e-06	22.8518
genus.Alistipes.id.968	rs1107244	A	G	0.0758558	0.0171182	17571	9.36717e-06	19.6341
genus.Alistipes.id.968	rs11769002	A	G	-0.0528793	0.0109389	17571	1.33764e-06	23.3657
genus.Alistipes.id.968	rs67281112	C	G	0.0634575	0.0137846	17090	4.15429e-06	21.1898
genus.Alistipes.id.968	rs67705352	G	T	-0.0532404	0.0110864	17567	1.56841e-06	23.0596
genus.Alistipes.id.968	rs7129639	A	C	-0.0524955	0.0109584	17571	1.66409e-06	22.9458
genus.Alistipes.id.968	rs8130320	G	A	-0.049002	0.010717	17571	4.82273e-06	20.904
genus.Allisonella.id.2174	rs35778461	T	C	0.146679	0.0297186	3212	7.99e-07	24.3449
genus.Allisonella.id.2174	rs602075	G	A	0.168974	0.0296976	3212	1.27e-08	32.3541
genus.Allisonella.id.2174	rs6742198	A	G	0.149152	0.0316484	3182	2.44e-06	22.1963
genus.Allisonella.id.2174	rs685403	C	G	-0.175203	0.0404474	3212	1.48e-05	18.7513
genus.Alloprevotella.id.961	rs12675596	T	G	0.145669	0.0290678	3008	5.40505e-07	25.0969
genus.Alloprevotella.id.961	rs4680035	G	A	-0.119599	0.0259446	3007	4.03052e-06	21.2361
genus.Anaerofilum.id.2053	rs10794359	C	T	-0.0953524	0.02006	4994	2.00057e-06	22.5854
genus.Anaerofilum.id.2053	rs17096874	T	C	-0.126337	0.0268919	5051	2.62779e-06	22.062
genus.Anaerofilum.id.2053	rs17105491	C	G	-0.193107	0.0411187	4856	2.64857e-06	22.0466
genus.Anaerofilum.id.2053	rs4506496	A	G	0.10309	0.0212861	4935	1.27857e-06	23.4457
genus.Anaerofilum.id.2053	rs712981	C	A	0.10076	0.0202902	5051	6.83784e-07	24.6505
genus.Anaerofilum.id.2053	rs79598899	T	C	0.182586	0.0357284	4709	3.21518e-07	26.1049
genus.Anaerofilum.id.2053	rs816292	C	T	-0.113003	0.02204	5017	2.9416e-07	26.2772
genus.Anaerostipes.id.1991	rs2014785	C	T	0.0515687	0.0112199	16445	4.30275e-06	21.1224
genus.Anaerostipes.id.1991	rs2396460	C	T	-0.0512653	0.0109555	16912	2.87727e-06	21.8941
genus.Anaerostipes.id.1991	rs2804244	G	A	-0.053089	0.0110983	16926	1.72235e-06	22.8795
genus.Anaerostipes.id.1991	rs3900776	A	G	-0.110013	0.0236302	14694	3.23e-06	21.6719
genus.Anaerostipes.id.1991	rs60983350	A	G	-0.0539901	0.0116575	16344	3.63292e-06	21.4468
genus.Anaerostipes.id.1991	rs62157625	C	T	0.088573	0.0185548	15215	1.80966e-06	22.7842
genus.Anaerostipes.id.1991	rs62215703	A	G	0.0644965	0.0136702	15550	2.38126e-06	22.2571
genus.Anaerostipes.id.1991	rs6726833	A	C	-0.0877497	0.0189408	16924	3.60694e-06	21.4606
genus.Anaerostipes.id.1991	rs6854026	C	T	-0.0508482	0.0109075	16921	3.13518e-06	21.7294
genus.Anaerostipes.id.1991	rs7193624	T	C	0.0750642	0.0150723	16926	6.34981e-07	24.8001
genus.Bacteroides.id.918	rs11585893	G	A	-0.0740746	0.0147633	17821	5.2356e-07	25.1722
genus.Bacteroides.id.918	rs17619981	G	T	0.0880978	0.0187002	15801	2.46434e-06	22.1913
genus.Bacteroides.id.918	rs28757219	A	T	0.0818398	0.0170319	14833	1.54674e-06	23.0859
genus.Bacteroides.id.918	rs495004	G	C	-0.0607475	0.0129865	17707	2.9007e-06	21.8787
genus.Bacteroides.id.918	rs66474973	T	G	0.0812515	0.0164479	17405	7.81489e-07	24.4001
genus.Bacteroides.id.918	rs6795673	T	C	0.0538565	0.0105251	18301	3.1052e-07	26.1803
genus.Bacteroides.id.918	rs9507307	T	C	0.0604456	0.0129128	18184	2.85389e-06	21.91
genus.Barnesiella.id.944	rs12909713	T	C	-0.0550716	0.0120039	14205	4.47925e-06	21.045
genus.Barnesiella.id.944	rs13242616	C	T	-0.0583747	0.0123176	13945	2.14631e-06	22.4562
genus.Barnesiella.id.944	rs199035	A	G	0.0559495	0.0119716	13945	2.96061e-06	21.8388
genus.Barnesiella.id.944	rs2057922	C	G	0.0915241	0.0194623	14208	2.5682e-06	22.1117
genus.Barnesiella.id.944	rs2276875	G	A	-0.0697176	0.0139537	13893	5.84261e-07	24.9599
genus.Barnesiella.id.944	rs2428166	A	G	-0.165859	0.0337309	8091	8.78294e-07	24.172
genus.Barnesiella.id.944	rs35177866	G	A	0.0917125	0.0190133	13394	1.40998e-06	23.2635
genus.Barnesiella.id.944	rs60316894	T	C	-0.121478	0.025184	12717	1.40969e-06	23.2637
genus.Barnesiella.id.944	rs62251337	G	A	-0.0690763	0.0149374	13945	3.75721e-06	21.3818
genus.Barnesiella.id.944	rs77455852	G	T	-0.0891491	0.0195601	13394	5.17142e-06	20.7696
genus.Barnesiella.id.944	rs79795328	G	A	-0.0818645	0.0176441	13657	3.48793e-06	21.5243
genus.Bifidobacterium.id.436	rs10841473	C	G	-0.0624207	0.0129438	14777	1.41828e-06	23.2526
genus.Bifidobacterium.id.436	rs13020688	A	G	0.0562696	0.0122617	14666	4.45293e-06	21.0564
genus.Bifidobacterium.id.436	rs182549	T	C	0.119703	0.0127294	14778	5.26663e-21	88.418
genus.Bifidobacterium.id.436	rs1961273	T	C	0.0674036	0.0132319	14778	3.50541e-07	25.9456
genus.Bifidobacterium.id.436	rs4567981	A	T	0.0562084	0.0117923	14666	1.87426e-06	22.7167
genus.Bifidobacterium.id.436	rs56108664	C	T	0.0729971	0.0157926	13916	3.79623e-06	21.362
genus.Bifidobacterium.id.436	rs62181700	A	G	-0.0624643	0.0131205	14774	1.92818e-06	22.6622
genus.Bifidobacterium.id.436	rs7322849	C	T	0.112428	0.0201813	14778	2.53379e-08	31.0311
genus.Bifidobacterium.id.436	rs73797465	G	T	-0.0953566	0.0209236	14666	5.18003e-06	20.7667
genus.Bifidobacterium.id.436	rs75344046	T	C	0.232354	0.0505979	3856	4.38657e-06	21.0771
genus.Bifidobacterium.id.436	rs76671854	G	C	-0.0846055	0.0184003	13806	4.26479e-06	21.1389
genus.Bifidobacterium.id.436	rs857444	T	C	0.0558234	0.0121219	14777	4.12143e-06	21.2047
genus.Bilophila.id.3170	rs116261629	C	G	0.128112	0.0261358	11276	9.49685e-07	24.0233
genus.Bilophila.id.3170	rs1241171	A	G	-0.0692654	0.0150148	12856	3.96644e-06	21.2777
genus.Bilophila.id.3170	rs1571225	T	C	0.0826826	0.0170621	12854	1.25998e-06	23.4797
genus.Bilophila.id.3170	rs3827020	T	C	0.0766479	0.0160642	12628	1.83002e-06	22.7621
genus.Bilophila.id.3170	rs542415	C	T	-0.0613623	0.0133436	12777	4.25268e-06	21.1441
genus.Bilophila.id.3170	rs6793291	A	C	0.112729	0.0241633	11051	3.08165e-06	21.7611
genus.Bilophila.id.3170	rs7802841	A	C	0.0670097	0.0137701	12856	1.13689e-06	23.6775
genus.Blautia.id.1992	rs11149971	T	C	0.117605	0.02339	16255	4.95627e-07	25.2777
genus.Blautia.id.1992	rs12453000	T	C	0.0625335	0.0129987	17815	1.5037e-06	23.1406
genus.Blautia.id.1992	rs67794373	T	C	0.0601709	0.0123443	18158	1.09143e-06	23.7571
genus.Blautia.id.1992	rs682885	G	A	-0.0493376	0.0107359	18274	4.31547e-06	21.117
genus.Blautia.id.1992	rs72973581	G	A	0.125169	0.0265408	12764	2.40406e-06	22.2381
genus.Blautia.id.1992	rs7860714	G	A	-0.0502178	0.0109853	18162	4.84536e-06	20.8952
genus.Butyricicoccus.id.2055	rs2017189	T	G	-0.0506956	0.011024	17133	4.25241e-06	21.1451
genus.Butyricicoccus.id.2055	rs56221232	C	T	0.0828027	0.0167401	17133	7.56062e-07	24.4638
genus.Butyricimonas.id.945	rs113054641	A	G	-0.144881	0.0274574	9949	1.31619e-07	27.8367
genus.Butyricimonas.id.945	rs1862649	A	G	0.113124	0.0248176	10123	5.1592e-06	20.7732
genus.Butyricimonas.id.945	rs2642760	C	G	0.0713357	0.0145396	10634	9.28035e-07	24.0674
genus.Butyricimonas.id.945	rs62130338	A	G	-0.0732608	0.0158324	10557	3.70509e-06	21.4076
genus.Butyricimonas.id.945	rs62390301	C	T	-0.0872983	0.0174893	10634	5.99023e-07	24.9107
genus.Butyricimonas.id.945	rs7083431	C	A	0.0703539	0.0144439	10737	1.11118e-06	23.7208
genus.Butyricimonas.id.945	rs71428626	T	G	-0.133188	0.0289905	9776	4.34411e-06	21.1024
genus.Butyricimonas.id.945	rs782080	A	T	0.0653488	0.0137973	10733	2.17623e-06	22.4286
genus.Butyricimonas.id.945	rs78453362	G	A	-0.14948	0.0327073	8207	4.87161e-06	20.882
genus.Butyricimonas.id.945	rs9657374	T	C	0.0680719	0.0148172	10737	4.34618e-06	21.1018
genus.Butyrivibrio.id.1993	rs11761679	C	T	0.154775	0.0321539	3482	1.48255e-06	23.1572
genus.Butyrivibrio.id.1993	rs16941336	T	C	0.127488	0.0267936	3482	1.9539e-06	22.6268
genus.Butyrivibrio.id.1993	rs4537857	C	T	-0.12459	0.0260992	3482	1.80868e-06	22.7752
genus.Butyrivibrio.id.1993	rs72723662	T	C	0.224078	0.0449336	3073	6.13655e-07	24.8527
genus.Butyrivibrio.id.1993	rs7412979	G	C	0.186779	0.0389112	3480	1.58568e-06	23.0279
genus.Butyrivibrio.id.1993	rs74622183	G	A	-0.201027	0.0428204	3478	2.6705e-06	22.0272
genus.Butyrivibrio.id.1993	rs7752361	G	A	-0.11923	0.0239975	3481	6.74908e-07	24.6713
genus.Butyrivibrio.id.1993	rs7763512	A	G	0.119846	0.0253367	3259	2.24387e-06	22.3603
genus.CandidatusSoleaferrea.id.11350	rs10090365	G	A	-0.0834413	0.0180989	6145	4.02081e-06	21.248
genus.CandidatusSoleaferrea.id.11350	rs10108780	G	A	-0.092834	0.0199807	5999	3.38114e-06	21.5799
genus.CandidatusSoleaferrea.id.11350	rs11153159	C	G	-0.12805	0.0285446	6101	7.25861e-06	20.1172
genus.CandidatusSoleaferrea.id.11350	rs61825792	C	T	0.112199	0.0231856	6145	1.30378e-06	23.41
genus.Catenibacterium.id.2153	rs12404911	T	C	0.140717	0.0304142	3239	3.71554e-06	21.3931
genus.Catenibacterium.id.2153	rs212393	A	G	-0.135254	0.0286209	3239	2.29318e-06	22.3185
genus.Catenibacterium.id.2153	rs73128290	G	A	0.129726	0.0284563	3239	5.1448e-06	20.7698
genus.Catenibacterium.id.2153	rs77285108	A	G	-0.161826	0.0353447	3210	4.68288e-06	20.9497
genus.ChristensenellaceaeR.7group.id.11283	rs17081797	G	A	-0.0904325	0.0204253	16324	9.53446e-06	19.6001
genus.ChristensenellaceaeR.7group.id.11283	rs62467127	T	C	0.114108	0.0251983	12719	5.94273e-06	20.5033
genus.ChristensenellaceaeR.7group.id.11283	rs892686	G	A	0.0514099	0.011136	16325	3.90155e-06	21.31
genus.ChristensenellaceaeR.7group.id.11283	rs999354	A	T	0.0580248	0.0117185	16324	7.36256e-07	24.5148
genus.Clostridiumsensustricto1.id.1873	rs115807074	G	A	-0.22736	0.0492575	4229	3.91702e-06	21.295
genus.Clostridiumsensustricto1.id.1873	rs116847295	T	C	0.110021	0.0246032	12910	7.75488e-06	19.9943
genus.Clostridiumsensustricto1.id.1873	rs12341505	A	G	0.0810718	0.0180121	14118	6.76475e-06	20.2558
genus.Clostridiumsensustricto1.id.1873	rs2795528	A	G	-0.184315	0.0392204	6366	2.60853e-06	22.078
genus.Clostridiumsensustricto1.id.1873	rs2817172	T	C	0.058139	0.0124492	13658	3.0107e-06	21.8065
genus.Clostridiumsensustricto1.id.1873	rs550843	C	T	-0.0783246	0.0169209	14102	3.67688e-06	21.4233
genus.Collinsella.id.815	rs2103510	A	G	0.0786551	0.0168217	14334	2.92782e-06	21.8602
genus.Collinsella.id.815	rs2671662	G	C	-0.0567751	0.011945	14334	2.00377e-06	22.5883
genus.Collinsella.id.815	rs73052258	A	G	0.0930178	0.0202658	14334	4.43498e-06	21.0641
genus.Collinsella.id.815	rs9541268	A	C	0.09597	0.0197312	12914	1.15115e-06	23.6535
genus.Coprobacter.id.949	rs143662916	T	C	0.253264	0.0540141	3083	2.7475e-06	21.971
genus.Coprobacter.id.949	rs213863	T	C	-0.0887412	0.0188377	6798	2.46719e-06	22.1853
genus.Coprobacter.id.949	rs305411	G	A	0.129218	0.0264518	6777	1.03399e-06	23.8567
genus.Coprobacter.id.949	rs3828477	T	G	-0.091218	0.019569	6798	3.14157e-06	21.7217
genus.Coprobacter.id.949	rs55672356	A	T	-0.193354	0.0413815	4903	2.97584e-06	21.8232
genus.Coprobacter.id.949	rs72821405	C	T	-0.147365	0.0319978	6177	4.11512e-06	21.2036
genus.Coprococcus1.id.11301	rs1010560	A	C	0.0580232	0.0122722	16723	2.26698e-06	22.3517
genus.Coprococcus1.id.11301	rs12794898	T	G	0.0903299	0.0197212	15186	4.64222e-06	20.9767
genus.Coprococcus1.id.11301	rs1576241	G	A	-0.0510343	0.0109535	16729	3.1744e-06	21.7056
genus.Coprococcus1.id.11301	rs4277593	A	G	-0.0585649	0.0109914	16651	9.91544e-08	28.387
genus.Coprococcus1.id.11301	rs56405618	G	A	-0.08963	0.0186508	16379	1.5422e-06	23.0918
genus.Coprococcus1.id.11301	rs73031725	C	T	0.167591	0.0355224	7206	2.38293e-06	22.2524
genus.Coprococcus1.id.11301	rs74101919	C	T	-0.0718989	0.0144651	16732	6.67805e-07	24.7029
genus.Coprococcus1.id.11301	rs7784490	G	C	-0.0518543	0.0113136	16733	4.57566e-06	21.0047
genus.Coprococcus2.id.11302	rs1958519	A	T	0.0665288	0.0138558	11009	1.57471e-06	23.0503
genus.Coprococcus2.id.11302	rs2482516	T	C	0.0754415	0.0164619	11483	4.58787e-06	20.9984
genus.Coprococcus2.id.11302	rs59936925	T	A	0.117085	0.0233995	10931	5.62231e-07	25.033
genus.Coprococcus2.id.11302	rs6677933	T	C	-0.0804405	0.0164216	11483	9.65961e-07	23.9906
genus.Coprococcus2.id.11302	rs72680320	C	T	-0.0649382	0.013919	11009	3.07963e-06	21.7623
genus.Coprococcus3.id.11303	rs11080344	T	C	0.0516921	0.0113054	15835	4.82322e-06	20.9036
genus.Coprococcus3.id.11303	rs13394391	T	C	-0.0709302	0.0150918	15834	2.60265e-06	22.0864
genus.Coprococcus3.id.11303	rs178271	C	T	0.145257	0.0294239	10794	7.9454e-07	24.3665
genus.Coprococcus3.id.11303	rs62481985	C	G	-0.0582385	0.0115052	15472	4.15052e-07	25.6197
genus.Coprococcus3.id.11303	rs7521171	A	G	-0.0596434	0.0129279	15472	3.95831e-06	21.2822
genus.Coprococcus3.id.11303	rs8100692	C	T	0.0577411	0.0113476	15829	3.61099e-07	25.8885
genus.DefluviitaleaceaeUCG011.id.11287	rs112893842	C	T	0.11381	0.0232806	8183	1.01537e-06	23.8929
genus.DefluviitaleaceaeUCG011.id.11287	rs12500663	G	T	-0.114704	0.022771	8132	4.72226e-07	25.3678
genus.DefluviitaleaceaeUCG011.id.11287	rs1582238	C	T	0.0805036	0.0167257	7983	1.48551e-06	23.1609
genus.DefluviitaleaceaeUCG011.id.11287	rs4344384	T	G	0.0715978	0.0156309	8180	4.6381e-06	20.9761
genus.DefluviitaleaceaeUCG011.id.11287	rs4677103	G	A	0.0977912	0.0197263	7983	7.14448e-07	24.5696
genus.DefluviitaleaceaeUCG011.id.11287	rs55658617	C	T	0.174369	0.0362226	6663	1.48074e-06	23.1659
genus.DefluviitaleaceaeUCG011.id.11287	rs9608282	G	T	0.142939	0.0299793	7716	1.86129e-06	22.7273
genus.DefluviitaleaceaeUCG011.id.11287	rs9725395	G	A	-0.13834	0.029554	8011	2.85602e-06	21.9055
genus.Desulfovibrio.id.3173	rs11160353	A	T	-0.0691756	0.0147285	9234	2.64381e-06	22.0543
genus.Desulfovibrio.id.3173	rs13066142	A	G	0.119141	0.0250891	9241	2.04721e-06	22.5453
genus.Desulfovibrio.id.3173	rs16863365	G	A	0.109402	0.0226964	8776	1.43369e-06	23.2296
genus.Desulfovibrio.id.3173	rs2853179	T	C	0.0811971	0.0174234	8949	3.15872e-06	21.7128
genus.Desulfovibrio.id.3173	rs6580353	C	T	0.0770979	0.0169735	9241	5.56587e-06	20.6275
genus.Dialister.id.2183	rs11166701	A	G	-0.0655301	0.013186	11720	6.70661e-07	24.6934
genus.Dialister.id.2183	rs4753063	A	G	-0.0596297	0.0130052	11989	4.53831e-06	21.0194
genus.Dorea.id.1997	rs13279148	A	G	0.0715309	0.0150878	17605	2.12676e-06	22.4744
genus.Dorea.id.1997	rs1899291	T	C	0.0697217	0.0150285	17609	3.49572e-06	21.5208
genus.Dorea.id.1997	rs4793307	T	C	0.0574165	0.0122472	17600	2.75688e-06	21.9762
genus.Dorea.id.1997	rs62503162	G	A	-0.0974091	0.0194379	16210	5.40656e-07	25.11
genus.Dorea.id.1997	rs73729431	T	C	-0.13745	0.0299983	9596	4.60699e-06	20.9897
genus.Eggerthella.id.819	rs112205261	C	T	-0.188618	0.0403613	5036	2.96492e-06	21.8305
genus.Eggerthella.id.819	rs2223081	A	G	0.102572	0.0221108	5147	3.50112e-06	21.5119
genus.Eggerthella.id.819	rs2240838	G	A	0.0980582	0.0197653	5147	7.00831e-07	24.6033
genus.Eggerthella.id.819	rs3851328	G	T	-0.107774	0.0236527	5147	5.2004e-06	20.754
genus.Eggerthella.id.819	rs76663501	T	C	0.175349	0.0378576	4814	3.62481e-06	21.4448
genus.Eisenbergiella.id.11304	rs11027642	T	C	0.129006	0.0284844	5583	5.92662e-06	20.5044
genus.Eisenbergiella.id.11304	rs12278566	A	T	-0.121065	0.0251658	5582	1.50415e-06	23.1344
genus.Eisenbergiella.id.11304	rs1508033	C	A	0.091546	0.0195787	5580	2.92803e-06	21.8553
genus.Eisenbergiella.id.11304	rs2683098	T	C	0.107319	0.022515	5582	1.8741e-06	22.7118
genus.Eisenbergiella.id.11304	rs3812426	A	G	0.106447	0.0224159	5583	2.04686e-06	22.5425
genus.Eisenbergiella.id.11304	rs4462860	A	G	0.0939071	0.0201104	5460	3.01828e-06	21.7969
genus.Enterorhabdus.id.820	rs11098863	A	T	-0.0966008	0.0162677	7524	2.88172e-09	35.2528
genus.Enterorhabdus.id.820	rs114731706	G	T	0.182308	0.0382298	5956	1.85378e-06	22.7333
genus.Enterorhabdus.id.820	rs3017103	G	A	0.0980897	0.0208995	7524	2.68689e-06	22.0222
genus.Enterorhabdus.id.820	rs424715	C	T	0.0818743	0.0174855	7524	2.8351e-06	21.9192
genus.Enterorhabdus.id.820	rs73331712	C	T	0.26199	0.055123	3109	2.00604e-06	22.5747
genus.Enterorhabdus.id.820	rs7923280	T	A	0.0860019	0.0169148	7524	3.68776e-07	25.8443
genus.Erysipelatoclostridium.id.11381	rs17804233	C	T	-0.0662914	0.0144203	9783	4.28447e-06	21.1289
genus.Erysipelatoclostridium.id.11381	rs340991	G	A	-0.0740482	0.0158891	9781	3.15745e-06	21.714
genus.Erysipelatoclostridium.id.11381	rs4697572	G	A	-0.0810636	0.0163308	9779	6.91117e-07	24.6347
genus.Erysipelatoclostridium.id.11381	rs58236560	T	G	-0.111157	0.0234426	9368	2.11966e-06	22.4786
genus.Erysipelatoclostridium.id.11381	rs622418	G	A	-0.0668051	0.0143224	9783	3.09574e-06	21.7518
genus.Erysipelatoclostridium.id.11381	rs6474512	C	A	0.067015	0.0143201	9783	2.87195e-06	21.8958
genus.Erysipelatoclostridium.id.11381	rs710230	C	T	0.143381	0.0281514	9016	3.52029e-07	25.9352
genus.Erysipelatoclostridium.id.11381	rs7221249	G	A	0.0839861	0.0142741	9781	4.00975e-09	34.6119
genus.ErysipelotrichaceaeUCG003.id.11384	rs10164067	G	T	-0.10326	0.0212405	14427	1.16515e-06	23.6306
genus.ErysipelotrichaceaeUCG003.id.11384	rs11877693	G	C	-0.0948369	0.0189222	14895	5.38842e-07	25.1162
genus.ErysipelotrichaceaeUCG003.id.11384	rs11994308	T	C	0.115417	0.0242503	13558	1.94139e-06	22.6488
genus.ErysipelotrichaceaeUCG003.id.11384	rs17798136	A	G	0.158818	0.0347674	7421	4.92405e-06	20.861
genus.ErysipelotrichaceaeUCG003.id.11384	rs28568391	G	A	-0.0583911	0.0118741	14544	8.76402e-07	24.1788
genus.ErysipelotrichaceaeUCG003.id.11384	rs59068084	G	T	0.0564772	0.0120224	14544	2.63142e-06	22.0651
genus.ErysipelotrichaceaeUCG003.id.11384	rs62403464	C	T	-0.0731743	0.0156516	14899	2.93658e-06	21.8546
genus.ErysipelotrichaceaeUCG003.id.11384	rs75949021	C	T	-0.169667	0.0374238	6721	5.79681e-06	20.548
genus.ErysipelotrichaceaeUCG003.id.11384	rs76502207	C	T	0.144844	0.0289929	10740	5.85823e-07	24.9537
genus.Escherichia.Shigella.id.3504	rs113127095	G	A	0.151009	0.0323434	8433	3.02765e-06	21.7938
genus.Escherichia.Shigella.id.3504	rs1154904	G	A	-0.0613376	0.0130644	12002	2.66593e-06	22.0395
genus.Escherichia.Shigella.id.3504	rs2267739	C	G	0.115505	0.0237628	11853	1.16929e-06	23.6231
genus.Escherichia.Shigella.id.3504	rs35555519	G	C	0.101976	0.0222883	12002	4.7551e-06	20.93
genus.Escherichia.Shigella.id.3504	rs592299	C	T	-0.0592004	0.0129486	11995	4.83227e-06	20.8992
genus.Escherichia.Shigella.id.3504	rs73208162	G	A	-0.119296	0.024839	11073	1.56496e-06	23.0623
genus.Faecalibacterium.id.2057	rs12320842	G	C	0.094833	0.0163962	17638	7.30191e-09	33.4489
genus.Faecalibacterium.id.2057	rs1271565	T	C	-0.0576251	0.0119649	17638	1.4634e-06	23.1929
genus.Faecalibacterium.id.2057	rs28376661	G	C	0.0504817	0.0109368	18087	3.91642e-06	21.303
genus.Faecalibacterium.id.2057	rs6910935	G	A	0.134864	0.0277032	12640	1.12633e-06	23.6954
genus.Faecalibacterium.id.2057	rs75499067	T	C	0.227585	0.0465522	4526	1.0145e-06	23.8899
genus.FamilyXIIIAD3011group.id.11293	rs12314465	G	A	-0.0919724	0.0197199	13568	3.10212e-06	21.7491
genus.FamilyXIIIAD3011group.id.11293	rs16840310	G	A	-0.0608052	0.0122149	14201	6.42605e-07	24.7765
genus.FamilyXIIIAD3011group.id.11293	rs16940167	T	C	0.0732552	0.0159898	14201	4.61942e-06	20.986
genus.FamilyXIIIAD3011group.id.11293	rs17156849	A	G	-0.112891	0.0245292	13352	4.17849e-06	21.178
genus.FamilyXIIIAD3011group.id.11293	rs62029761	G	A	0.128753	0.0276002	9655	3.08725e-06	21.757
genus.FamilyXIIIAD3011group.id.11293	rs62200412	T	C	-0.0800851	0.0163834	13661	1.01774e-06	23.8908
genus.FamilyXIIIAD3011group.id.11293	rs72730932	A	C	-0.0899559	0.0177107	13102	3.79036e-07	25.7943
genus.FamilyXIIIAD3011group.id.11293	rs9852893	G	C	0.0657834	0.0129056	14184	3.4459e-07	25.9785
genus.FamilyXIIIUCG001.id.11294	rs116979587	A	T	-0.121679	0.0260821	11989	3.08267e-06	21.7608
genus.FamilyXIIIUCG001.id.11294	rs12049454	C	T	-0.0647298	0.0134065	12748	1.37756e-06	23.3081
genus.FamilyXIIIUCG001.id.11294	rs1426266	C	T	-0.0665521	0.0137151	12751	1.21927e-06	23.5429
genus.FamilyXIIIUCG001.id.11294	rs62414802	T	C	-0.0611904	0.013457	12750	5.43875e-06	20.673
genus.FamilyXIIIUCG001.id.11294	rs7119679	A	G	-0.0809085	0.0174782	12445	3.67247e-06	21.4252
genus.FamilyXIIIUCG001.id.11294	rs76463770	G	A	0.19313	0.0419866	5651	4.22908e-06	21.1506
genus.Flavonifractor.id.2059	rs11811696	C	T	-0.116063	0.0241012	10221	1.46724e-06	23.1859
genus.Flavonifractor.id.2059	rs12030302	G	A	-0.0692276	0.0137467	10805	4.755e-07	25.356
genus.Flavonifractor.id.2059	rs34066017	G	A	0.0764294	0.0159789	10705	1.7258e-06	22.8741
genus.Flavonifractor.id.2059	rs806808	C	T	0.0667272	0.0136557	10801	1.02706e-06	23.8723
genus.Fusicatenibacter.id.11305	rs1864685	C	A	-0.0494799	0.0108105	17374	4.7163e-06	20.9468
genus.Fusicatenibacter.id.11305	rs2025938	A	G	-0.0967298	0.0205426	15626	2.49239e-06	22.1695
genus.Fusicatenibacter.id.11305	rs2039204	A	T	-0.0497414	0.0107941	17383	4.06187e-06	21.233
genus.Fusicatenibacter.id.11305	rs2132128	A	G	-0.0771914	0.0160344	17370	1.47867e-06	23.1729
genus.Fusicatenibacter.id.11305	rs3303	C	T	-0.0953657	0.020407	16877	2.9656e-06	21.8361
genus.Fusicatenibacter.id.11305	rs4378146	C	A	-0.0616691	0.0125259	17384	8.50839e-07	24.2364
genus.Fusicatenibacter.id.11305	rs62187631	C	T	-0.0710571	0.015924	16522	8.10993e-06	19.9094
genus.Fusicatenibacter.id.11305	rs62353480	G	A	-0.0701397	0.0145589	16119	1.45255e-06	23.2069
genus.Fusicatenibacter.id.11305	rs704418	C	T	0.0739124	0.0151073	16626	9.95618e-07	23.9337
genus.Fusicatenibacter.id.11305	rs8063430	C	T	-0.104026	0.022217	15552	2.83673e-06	21.9211
genus.Gordonibacter.id.821	rs322296	A	G	0.17869	0.037722	3595	2.16888e-06	22.4268
genus.Gordonibacter.id.821	rs7220558	T	A	0.116884	0.0234834	3723	6.44722e-07	24.7604
genus.Gordonibacter.id.821	rs72714787	A	C	0.181405	0.0377102	3723	1.50553e-06	23.1285
genus.Gordonibacter.id.821	rs7294633	T	C	0.12867	0.0249946	3723	2.63411e-07	26.4867
genus.Gordonibacter.id.821	rs76287110	T	A	-0.242965	0.0466177	3483	1.8696e-07	27.1478
genus.Haemophilus.id.3698	rs10781340	A	G	0.0948915	0.0203221	9037	3.02108e-06	21.7983
genus.Haemophilus.id.3698	rs111582866	A	G	-0.124265	0.026016	8370	1.78376e-06	22.8095
genus.Haemophilus.id.3698	rs12191680	G	C	0.106544	0.0200323	9115	1.04556e-07	28.2815
genus.Haemophilus.id.3698	rs35509	A	G	0.128249	0.0268779	8430	1.82825e-06	22.7622
genus.Haemophilus.id.3698	rs4822728	C	T	0.0705861	0.0151388	9119	3.12228e-06	21.7351
genus.Haemophilus.id.3698	rs76022354	T	C	0.244638	0.0505504	3618	1.30183e-06	23.4076
genus.Haemophilus.id.3698	rs78909003	C	T	-0.246256	0.0503924	3559	1.02507e-06	23.867
genus.Haemophilus.id.3698	rs9328464	C	T	0.0723095	0.0148799	9119	1.17668e-06	23.6098
genus.Haemophilus.id.3698	rs9382510	T	C	-0.093521	0.0172649	9117	6.06595e-08	29.3358
genus.Haemophilus.id.3698	rs9574096	T	A	-0.0736375	0.0155227	9118	2.09691e-06	22.4992
genus.Haemophilus.id.3698	rs9895850	C	T	-0.192957	0.0416755	4592	3.65699e-06	21.4274
genus.Holdemanella.id.11393	rs12513188	A	G	0.0903906	0.0195276	7700	3.67684e-06	21.4208
genus.Holdemanella.id.11393	rs4541991	C	T	-0.0927334	0.0194435	7657	1.84788e-06	22.7411
genus.Holdemanella.id.11393	rs4802175	A	G	0.0790155	0.0173394	7456	5.18927e-06	20.7606
genus.Holdemanella.id.11393	rs607782	C	T	-0.0854214	0.0172515	7456	7.36313e-07	24.5111
genus.Holdemanella.id.11393	rs73011279	C	T	-0.0961669	0.0199336	7456	1.40459e-06	23.2681
genus.Holdemanella.id.11393	rs75764681	C	T	-0.283103	0.0598999	3003	2.28688e-06	22.3227
genus.Holdemanella.id.11393	rs761624	G	C	0.0959801	0.0179537	7706	8.99337e-08	28.572
genus.Holdemania.id.2157	rs111745969	G	A	0.120677	0.0265781	8233	5.61309e-06	20.6108
genus.Holdemania.id.2157	rs116500994	T	G	-0.13755	0.0293386	8432	2.75378e-06	21.9757
genus.Holdemania.id.2157	rs150096134	A	T	0.162139	0.0332089	6906	1.04804e-06	23.8309
genus.Holdemania.id.2157	rs1867876	C	T	0.0842919	0.0162192	9109	2.02478e-07	27.0034
genus.Holdemania.id.2157	rs41438744	G	C	-0.12487	0.027013	8839	3.78931e-06	21.3637
genus.Holdemania.id.2157	rs6133067	C	T	0.0910829	0.0178561	8863	3.37966e-07	26.0137
genus.Holdemania.id.2157	rs77293403	G	A	0.164556	0.0341775	7585	1.47374e-06	23.1758
genus.Holdemania.id.2157	rs9500080	T	C	0.0926764	0.0178886	9106	2.20998e-07	26.8343
genus.Howardella.id.2000	rs12452946	G	A	-0.105833	0.0228941	3800	3.79e-06	21.3584
genus.Howardella.id.2000	rs1484873	G	A	-0.227831	0.046335	3608	8.79e-07	24.1639
genus.Howardella.id.2000	rs17167098	A	G	-0.169366	0.0352068	3586	1.5e-06	23.1289
genus.Howardella.id.2000	rs36081916	C	T	-0.18123	0.0402987	3216	6.89e-06	20.2119
genus.Howardella.id.2000	rs609430	G	T	-0.112045	0.0239328	3798	2.85e-06	21.9065
genus.Howardella.id.2000	rs672217	A	G	0.164146	0.0349993	3611	2.73e-06	21.9837
genus.Howardella.id.2000	rs901099	G	T	-0.12718	0.0250924	3647	4.01e-07	25.6753
genus.Intestinibacter.id.11345	rs10805326	A	G	0.0775151	0.0139665	12303	2.85533e-08	30.7984
genus.Intestinibacter.id.11345	rs118030283	A	G	-0.151829	0.0324471	8830	2.87892e-06	21.8907
genus.Intestinibacter.id.11345	rs16938435	C	T	-0.112189	0.0235439	12303	1.88779e-06	22.7023
genus.Intestinibacter.id.11345	rs2702387	G	A	0.0608559	0.0132145	12291	4.12028e-06	21.2046
genus.Intestinibacter.id.11345	rs4327025	A	G	-0.0810346	0.0154397	12303	1.53371e-07	27.5419
genus.Intestinibacter.id.11345	rs478972	C	T	-0.142681	0.0297116	10333	1.56938e-06	23.0566
genus.Intestinibacter.id.11345	rs6875660	T	C	0.0890455	0.0193905	12293	4.38555e-06	21.0851
genus.Intestinimonas.id.2062	rs10262702	C	T	0.0918017	0.0194885	11766	2.4703e-06	22.1857
genus.Intestinimonas.id.2062	rs11258178	G	A	0.0660742	0.0134139	11766	8.40123e-07	24.2595
genus.Intestinimonas.id.2062	rs11928843	A	G	-0.0607331	0.0132035	11766	4.22966e-06	21.1543
genus.Intestinimonas.id.2062	rs12226153	G	A	-0.151142	0.0306922	9023	8.45965e-07	24.2449
genus.Intestinimonas.id.2062	rs12566247	A	T	0.0637084	0.0135355	12076	2.51697e-06	22.1498
genus.Intestinimonas.id.2062	rs1859797	A	G	0.060368	0.0131793	11766	4.63801e-06	20.9777
genus.Intestinimonas.id.2062	rs2731794	T	C	0.120632	0.0257529	11079	2.81041e-06	21.9379
genus.Intestinimonas.id.2062	rs2930225	T	G	0.0729524	0.0152948	12003	1.84468e-06	22.7466
genus.Intestinimonas.id.2062	rs4784055	C	T	-0.175324	0.038599	3193	5.56738e-06	20.6185
genus.Intestinimonas.id.2062	rs62240188	A	G	0.130074	0.0267179	10252	1.12501e-06	23.6968
genus.Intestinimonas.id.2062	rs716604	G	A	0.0818068	0.0165992	12090	8.29275e-07	24.2846
genus.Intestinimonas.id.2062	rs7170984	C	T	-0.0658116	0.0140767	12090	2.93664e-06	21.8539
genus.Intestinimonas.id.2062	rs72982915	T	C	0.183158	0.0402743	5591	5.42187e-06	20.6748
genus.Lachnoclostridium.id.11308	rs4738679	A	G	-0.0520267	0.011404	17921	5.06389e-06	20.8106
genus.Lachnoclostridium.id.11308	rs6112314	C	A	-0.0561715	0.0108174	17842	2.0728e-07	26.961
genus.Lachnoclostridium.id.11308	rs615997	C	T	0.0511752	0.0106491	17911	1.54278e-06	23.0913
genus.Lachnoclostridium.id.11308	rs61915992	T	A	0.0803876	0.0172209	16773	3.04098e-06	21.7879
genus.Lachnoclostridium.id.11308	rs62285313	G	A	0.0864203	0.0181565	16991	1.93848e-06	22.6524
genus.Lachnoclostridium.id.11308	rs78068103	G	A	0.0886199	0.0194248	17477	5.06188e-06	20.8113
genus.Lachnoclostridium.id.11308	rs789029	T	C	-0.0641289	0.0137974	17922	3.35345e-06	21.6005
genus.Lachnospira.id.2004	rs13157098	G	A	-0.0768058	0.0155312	15947	7.60423e-07	24.4525
genus.Lachnospira.id.2004	rs2326833	G	C	-0.078495	0.017109	15632	4.47654e-06	21.0464
genus.Lachnospira.id.2004	rs4686798	C	T	0.0531826	0.0113747	16497	2.93239e-06	21.8576
genus.Lachnospira.id.2004	rs4923324	A	G	-0.0617321	0.0133387	16490	3.69108e-06	21.4163
genus.Lachnospira.id.2004	rs56791201	C	T	0.051823	0.0110697	16486	2.84743e-06	21.9141
genus.LachnospiraceaeFCS020group.id.11314	rs10093861	A	G	-0.0568869	0.0121152	13772	2.65952e-06	22.0445
genus.LachnospiraceaeFCS020group.id.11314	rs113859143	C	G	-0.108906	0.0242055	13238	6.81955e-06	20.2401
genus.LachnospiraceaeFCS020group.id.11314	rs12078956	G	C	0.106101	0.0222904	13101	1.93653e-06	22.6535
genus.LachnospiraceaeFCS020group.id.11314	rs1363769	C	T	-0.200628	0.0449372	3555	8.0204e-06	19.9218
genus.LachnospiraceaeFCS020group.id.11314	rs2862811	C	T	0.0564927	0.0121736	13772	3.47413e-06	21.532
genus.LachnospiraceaeFCS020group.id.11314	rs35035870	C	T	-0.190615	0.0414403	5642	4.22979e-06	21.1503
genus.LachnospiraceaeFCS020group.id.11314	rs369444	G	C	0.125481	0.0259008	12465	1.26808e-06	23.4673
genus.LachnospiraceaeFCS020group.id.11314	rs62140927	T	C	0.0613709	0.0131055	13771	2.82919e-06	21.9259
genus.LachnospiraceaeFCS020group.id.11314	rs7249113	A	G	0.0679483	0.0133496	13534	3.58218e-07	25.9034
genus.LachnospiraceaeFCS020group.id.11314	rs72793667	G	A	-0.116881	0.0246589	12396	2.13822e-06	22.463
genus.LachnospiraceaeFCS020group.id.11314	rs9788306	T	C	-0.062804	0.0130744	13772	1.55857e-06	23.071
genus.LachnospiraceaeFCS020group.id.11314	rs9919338	C	G	-0.0553339	0.0120621	13768	4.48776e-06	21.0413
genus.LachnospiraceaeNC2004group.id.11316	rs12127733	A	G	0.115182	0.0246006	6226	2.8401e-06	21.9146
genus.LachnospiraceaeNC2004group.id.11316	rs3756315	G	A	-0.0883469	0.0188397	6328	2.73997e-06	21.9836
genus.LachnospiraceaeNC2004group.id.11316	rs6116753	A	G	0.0994748	0.0209139	6278	1.97085e-06	22.616
genus.LachnospiraceaeND3007group.id.11317	rs13110238	G	C	-0.0636978	0.0142041	15019	7.30994e-06	20.1077
genus.LachnospiraceaeND3007group.id.11317	rs9932954	G	A	-0.0561864	0.0115984	15222	1.2705e-06	23.4643
genus.LachnospiraceaeUCG001.id.11321	rs10815577	G	C	-0.0683706	0.0143691	10149	1.95341e-06	22.6359
genus.LachnospiraceaeUCG001.id.11321	rs2050911	A	G	0.0751466	0.0153934	10148	1.05158e-06	23.8266
genus.LachnospiraceaeUCG001.id.11321	rs437876	C	T	0.0784637	0.0144768	10150	5.96083e-08	29.3703
genus.LachnospiraceaeUCG001.id.11321	rs573933	C	T	-0.107898	0.0232346	10150	3.41951e-06	21.5612
genus.LachnospiraceaeUCG001.id.11321	rs78848836	G	A	-0.118868	0.0259753	9506	4.73523e-06	20.9371
genus.LachnospiraceaeUCG001.id.11321	rs8052586	C	T	0.176336	0.0395882	6004	8.41782e-06	19.8339
genus.LachnospiraceaeUCG001.id.11321	rs9403580	T	C	0.107801	0.0229777	10095	2.71178e-06	22.006
genus.LachnospiraceaeUCG001.id.11321	rs985416	T	C	0.0970258	0.0181807	9917	9.46266e-08	28.4752
genus.LachnospiraceaeUCG004.id.11324	rs11128180	G	A	0.0648288	0.0140126	14466	3.71978e-06	21.4011
genus.LachnospiraceaeUCG004.id.11324	rs12673420	A	G	0.0554351	0.0118375	14463	2.82709e-06	21.9274
genus.LachnospiraceaeUCG004.id.11324	rs12747809	A	G	-0.062197	0.0125685	14464	7.47276e-07	24.4858
genus.LachnospiraceaeUCG004.id.11324	rs12894272	G	A	0.0579792	0.0125229	14463	3.65922e-06	21.4326
genus.LachnospiraceaeUCG004.id.11324	rs2444793	T	C	-0.0542433	0.0118188	14463	4.44098e-06	21.0615
genus.LachnospiraceaeUCG004.id.11324	rs2882478	A	G	-0.0577091	0.0118338	14466	1.07923e-06	23.7781
genus.LachnospiraceaeUCG004.id.11324	rs35182105	G	A	-0.109724	0.024221	13170	5.89474e-06	20.519
genus.LachnospiraceaeUCG008.id.11328	rs10741777	C	T	-0.0973842	0.0194791	7014	5.75055e-07	24.987
genus.LachnospiraceaeUCG008.id.11328	rs10793103	T	C	0.0974344	0.0181279	7014	7.66572e-08	28.8805
genus.LachnospiraceaeUCG008.id.11328	rs10801803	A	G	-0.117029	0.0243085	7017	1.47689e-06	23.1712
genus.LachnospiraceaeUCG008.id.11328	rs13024781	C	T	-0.0798769	0.0168846	7016	2.23674e-06	22.3738
genus.LachnospiraceaeUCG008.id.11328	rs57091572	G	A	-0.110443	0.0235801	6950	2.81718e-06	21.9309
genus.LachnospiraceaeUCG008.id.11328	rs62277846	T	C	0.102292	0.0212319	7016	1.45101e-06	23.2052
genus.LachnospiraceaeUCG008.id.11328	rs67078837	C	T	-0.0845848	0.0170693	7016	7.21865e-07	24.5489
genus.LachnospiraceaeUCG008.id.11328	rs955844	C	A	0.112064	0.0228369	6863	9.24114e-07	24.0731
genus.LachnospiraceaeUCG008.id.11328	rs9873555	C	G	-0.121162	0.0233467	6577	2.1067e-07	26.9245
genus.LachnospiraceaeUCG010.id.11330	rs10414815	C	T	0.10453	0.0230253	11564	5.63129e-06	20.606
genus.LachnospiraceaeUCG010.id.11330	rs11192447	G	A	0.126592	0.024345	12695	1.99371e-07	27.0349
genus.LachnospiraceaeUCG010.id.11330	rs12346653	T	C	0.0657686	0.0139569	12816	2.44994e-06	22.2019
genus.LachnospiraceaeUCG010.id.11330	rs72761829	T	A	0.111884	0.0238893	11488	2.82126e-06	21.9306
genus.LachnospiraceaeUCG010.id.11330	rs74315802	T	G	0.0867262	0.0183477	12715	2.2807e-06	22.3393
genus.LachnospiraceaeUCG010.id.11330	rs9981767	C	A	0.0655062	0.0131994	12816	6.94803e-07	24.6256
genus.Lactobacillus.id.1837	rs11674854	T	C	-0.0852686	0.0176504	6655	1.3586e-06	23.3314
genus.Lactobacillus.id.1837	rs1530559	A	G	0.0804001	0.0178207	6655	6.43403e-06	20.3484
genus.Lactobacillus.id.1837	rs16861661	A	G	-0.183147	0.038148	5325	1.57909e-06	23.0405
genus.Lactobacillus.id.1837	rs328312	A	T	0.0815092	0.0169441	6950	1.50575e-06	23.134
genus.Lactobacillus.id.1837	rs6092149	T	A	-0.0801344	0.017149	6906	2.97056e-06	21.8292
genus.Lactobacillus.id.1837	rs62314653	A	C	0.187692	0.0394585	5944	1.96787e-06	22.6185
genus.Lactobacillus.id.1837	rs7399658	A	G	-0.107134	0.0221883	6613	1.37638e-06	23.3063
genus.Lactobacillus.id.1837	rs768253	G	T	-0.079195	0.0171791	6958	4.02741e-06	21.2456
genus.Lactobacillus.id.1837	rs921925	C	A	0.0985077	0.0203229	6952	1.2526e-06	23.4879
genus.Lactococcus.id.1851	rs10417872	G	T	0.118306	0.024522	4056	1.40369e-06	23.2641
genus.Lactococcus.id.1851	rs123059	C	T	-0.13671	0.0274694	3760	6.46406e-07	24.7555
genus.Lactococcus.id.1851	rs2293361	T	C	-0.199221	0.0430969	3787	3.78901e-06	21.3574
genus.Lactococcus.id.1851	rs34757988	C	G	0.122294	0.0228976	4055	9.24846e-08	28.5112
genus.Lactococcus.id.1851	rs4766997	T	C	0.114599	0.023839	4053	1.5305e-06	23.0979
genus.Lactococcus.id.1851	rs55910161	T	C	0.146426	0.0307367	3836	1.89905e-06	22.6827
genus.Lactococcus.id.1851	rs757872	C	G	0.140799	0.027582	3792	3.3123e-07	26.0447
genus.Lactococcus.id.1851	rs7992246	C	T	0.104232	0.0230786	4057	6.29039e-06	20.3877
genus.Marvinbryantia.id.2005	rs11645029	C	G	-0.060618	0.0131551	11709	4.06676e-06	21.2295
genus.Marvinbryantia.id.2005	rs1187983	T	C	-0.0935456	0.0193174	11896	1.28187e-06	23.4463
genus.Marvinbryantia.id.2005	rs2724813	G	A	-0.0840769	0.0167551	11610	5.22133e-07	25.1759
genus.Marvinbryantia.id.2005	rs2842896	T	C	-0.0649396	0.0131146	11709	7.35735e-07	24.515
genus.Marvinbryantia.id.2005	rs2863363	G	A	0.0634861	0.0136323	11950	3.20789e-06	21.6844
genus.Marvinbryantia.id.2005	rs61884471	A	G	0.124426	0.0248431	11559	5.48608e-07	25.0806
genus.Marvinbryantia.id.2005	rs72948274	C	A	-0.126354	0.0272212	11561	3.45466e-06	21.5421
genus.Methanobrevibacter.id.123	rs10202904	G	T	-0.112811	0.0239106	3583	2.38137e-06	22.2474
genus.Methanobrevibacter.id.123	rs73457410	G	A	0.218128	0.044466	3387	9.319e-07	24.0497
genus.Methanobrevibacter.id.123	rs894996	A	C	0.214213	0.0456045	3479	2.63773e-06	22.0509
genus.Odoribacter.id.952	rs10093869	G	A	-0.0577795	0.0125389	14218	4.06545e-06	21.2308
genus.Odoribacter.id.952	rs28417404	G	A	-0.0726896	0.0161372	14698	6.65362e-06	20.2876
genus.Odoribacter.id.952	rs503751	G	C	0.0618294	0.0118887	14218	1.98532e-07	27.0435
genus.Odoribacter.id.952	rs77779484	A	G	-0.133489	0.0268526	11935	6.65433e-07	24.7086
genus.Olsenella.id.822	rs1035588	G	A	-0.108148	0.0236848	3739	4.96765e-06	20.8386
genus.Olsenella.id.822	rs17148768	A	G	0.140434	0.0295602	3648	2.02624e-06	22.5576
genus.Olsenella.id.822	rs2759329	A	G	-0.111131	0.0237218	3739	2.80272e-06	21.9353
genus.Olsenella.id.822	rs35225860	G	A	-0.223604	0.0482391	3630	3.56391e-06	21.4743
genus.Olsenella.id.822	rs6046522	T	C	0.122938	0.0269928	3705	5.25131e-06	20.7322
genus.Olsenella.id.822	rs62112538	T	C	-0.19943	0.0407033	3630	9.6024e-07	23.993
genus.Olsenella.id.822	rs72691585	A	C	-0.249079	0.0520814	3078	1.73137e-06	22.8573
genus.Oscillibacter.id.2063	rs11627628	C	T	0.143961	0.0290223	8486	7.03676e-07	24.5992
genus.Oscillibacter.id.2063	rs11990279	C	T	-0.0824934	0.0180457	8528	4.84594e-06	20.8923
genus.Oscillibacter.id.2063	rs12649930	G	T	0.121589	0.0259612	8794	2.82041e-06	21.93
genus.Oscillibacter.id.2063	rs133832	C	A	-0.0795527	0.0162411	8926	9.66964e-07	23.9874
genus.Oscillibacter.id.2063	rs137917150	A	T	-0.174992	0.0388394	5733	6.6207e-06	20.2927
genus.Oscillibacter.id.2063	rs16866406	G	A	0.0988765	0.0208795	8930	2.18441e-06	22.4206
genus.Oscillibacter.id.2063	rs16934185	G	A	-0.129568	0.028157	8492	4.19237e-06	21.1698
genus.Oscillibacter.id.2063	rs234108	G	A	0.0749553	0.0152632	8694	9.06828e-07	24.1109
genus.Oscillibacter.id.2063	rs36095275	T	C	-0.0752368	0.0156861	8694	1.61545e-06	23.0001
genus.Oscillibacter.id.2063	rs4506202	G	A	-0.0711323	0.0152261	8694	2.98668e-06	21.8201
genus.Oscillibacter.id.2063	rs61883564	G	A	-0.101351	0.0221016	8930	4.52443e-06	21.024
genus.Oscillibacter.id.2063	rs761240	G	T	-0.17664	0.0388812	5185	5.54437e-06	20.6314
genus.Oscillibacter.id.2063	rs9393920	G	A	-0.0744662	0.0151081	8930	8.26981e-07	24.2885
genus.Oscillospira.id.2064	rs12206468	A	G	-0.133016	0.0269733	9554	8.16503e-07	24.3134
genus.Oscillospira.id.2064	rs1954532	C	T	-0.0826246	0.0175252	9841	2.42156e-06	22.2232
genus.Oscillospira.id.2064	rs28889936	C	A	0.114051	0.0252838	9758	6.45768e-06	20.3433
genus.Oscillospira.id.2064	rs73038677	A	T	-0.08321	0.0168666	10195	8.07966e-07	24.334
genus.Oxalobacter.id.2978	rs10464997	A	G	0.137691	0.0294804	4650	3.00321e-06	21.8051
genus.Oxalobacter.id.2978	rs11108500	G	A	-0.199099	0.0427327	4303	3.17474e-06	21.6979
genus.Oxalobacter.id.2978	rs12002250	C	A	0.217122	0.0466317	4297	3.22242e-06	21.6693
genus.Oxalobacter.id.2978	rs1569853	C	T	-0.138078	0.0296981	4492	3.32953e-06	21.607
genus.Oxalobacter.id.2978	rs36057338	T	G	0.207847	0.0421439	4244	8.14591e-07	24.3116
genus.Oxalobacter.id.2978	rs4428215	A	G	0.130293	0.0242237	4655	7.50149e-08	28.9183
genus.Oxalobacter.id.2978	rs6000536	T	C	-0.130992	0.0253804	4654	2.45441e-07	26.626
genus.Oxalobacter.id.2978	rs6071435	A	T	-0.105512	0.021489	4635	9.10439e-07	24.0984
genus.Oxalobacter.id.2978	rs736744	T	C	0.117882	0.0211262	4655	2.40671e-08	31.1218
genus.Parabacteroides.id.954	rs115602804	A	G	0.10308	0.0222736	16394	3.69374e-06	21.4149
genus.Parabacteroides.id.954	rs3860755	C	G	0.0558784	0.0116625	17294	1.657e-06	22.954
genus.Parabacteroides.id.954	rs4236095	A	G	0.0761961	0.0157042	16383	1.22241e-06	23.5387
genus.Parabacteroides.id.954	rs60884758	T	C	-0.0702667	0.0142249	17293	7.82428e-07	24.3978
genus.Paraprevotella.id.962	rs145020347	G	A	-0.12465	0.0262323	6859	2.01643e-06	22.5727
genus.Paraprevotella.id.962	rs17785622	G	A	0.248065	0.0524304	3288	2.23056e-06	22.3718
genus.Paraprevotella.id.962	rs2081023	G	A	-0.122561	0.0236507	7178	2.19387e-07	26.8468
genus.Paraprevotella.id.962	rs3008582	C	T	0.10572	0.0227246	7175	3.2835e-06	21.6373
genus.Paraprevotella.id.962	rs4756632	T	G	-0.138905	0.0289897	7179	1.65499e-06	22.9525
genus.Paraprevotella.id.962	rs4767113	T	C	0.0882466	0.018382	6900	1.58096e-06	23.0402
genus.Paraprevotella.id.962	rs58117850	A	C	-0.149982	0.0324013	6838	3.67632e-06	21.4204
genus.Paraprevotella.id.962	rs9602779	C	A	-0.106692	0.0220264	7177	1.27362e-06	23.4561
genus.Paraprevotella.id.962	rs9900242	G	A	-0.0852967	0.0175212	6900	1.12615e-06	23.6926
genus.Parasutterella.id.2892	rs10899911	G	A	-0.0717102	0.0148151	11386	1.29625e-06	23.4247
genus.Parasutterella.id.2892	rs1403396	T	A	-0.0756729	0.0159035	11378	1.95265e-06	22.6371
genus.Parasutterella.id.2892	rs2090816	C	A	0.0840967	0.0177315	11385	2.10796e-06	22.4901
genus.Parasutterella.id.2892	rs2387977	C	T	-0.0681778	0.0134756	11345	4.20652e-07	25.5927
genus.Parasutterella.id.2892	rs35055552	C	T	0.109554	0.0235433	9970	3.26645e-06	21.649
genus.Parasutterella.id.2892	rs35414597	A	T	-0.0684946	0.0142143	11386	1.44495e-06	23.2158
genus.Parasutterella.id.2892	rs55877868	C	A	-0.104458	0.0228089	10588	4.65668e-06	20.9696
genus.Parasutterella.id.2892	rs6828768	T	C	0.0636852	0.0132645	11386	1.57742e-06	23.0472
genus.Parasutterella.id.2892	rs7303158	T	C	0.0646859	0.0134256	11386	1.44928e-06	23.2101
genus.Parasutterella.id.2892	rs7572229	A	G	0.066273	0.0132736	11383	5.94953e-07	24.9242
genus.Parasutterella.id.2892	rs78383039	C	T	-0.146315	0.0297119	9174	8.46017e-07	24.2448
genus.Parasutterella.id.2892	rs8039785	G	T	0.0618345	0.0133	11383	3.33226e-06	21.6113
genus.Parasutterella.id.2892	rs823424	A	G	-0.0713448	0.0156958	11386	5.48139e-06	20.6576
genus.Phascolarctobacterium.id.2168	rs12618201	G	A	0.0641657	0.0138202	11113	3.4356e-06	21.5526
genus.Phascolarctobacterium.id.2168	rs1264476	G	T	0.0767335	0.0166041	11104	3.81255e-06	21.353
genus.Phascolarctobacterium.id.2168	rs56069061	A	G	-0.111306	0.0230694	11007	1.4013e-06	23.2746
genus.Phascolarctobacterium.id.2168	rs56157888	C	A	0.0954864	0.0193976	10031	8.54111e-07	24.227
genus.Phascolarctobacterium.id.2168	rs6427992	C	G	-0.0652458	0.0137508	11113	2.08649e-06	22.5097
genus.Phascolarctobacterium.id.2168	rs74540770	A	G	-0.121014	0.0258621	9403	2.87965e-06	21.8905
genus.Phascolarctobacterium.id.2168	rs75882962	C	T	0.0968661	0.0190575	10710	3.71851e-07	25.8303
genus.Phascolarctobacterium.id.2168	rs76124218	G	C	-0.159361	0.0344532	7314	3.73817e-06	21.3888
genus.Prevotella7.id.11182	rs2240542	T	C	0.12085	0.0261776	3489	3.902e-06	21.3002
genus.Prevotella7.id.11182	rs385483	G	A	0.137033	0.0291906	3318	2.67332e-06	22.0245
genus.Prevotella7.id.11182	rs57404562	A	C	0.155486	0.0316057	3487	8.67337e-07	24.1883
genus.Prevotella7.id.11182	rs9608249	G	A	-0.158213	0.0336317	3482	2.54749e-06	22.1176
genus.Prevotella7.id.11182	rs9959718	A	G	0.133012	0.0275361	3489	1.36222e-06	23.3199
genus.Prevotella9.id.11183	rs10512344	G	C	0.247373	0.0544087	3063	5.45269e-06	20.6578
genus.Prevotella9.id.11183	rs111509883	C	T	0.171131	0.0347624	6960	8.52865e-07	24.2276
genus.Prevotella9.id.11183	rs11685699	T	C	-0.141357	0.0295665	8342	1.74423e-06	22.8525
genus.Prevotella9.id.11183	rs117271932	G	A	0.208089	0.0440393	4878	2.30039e-06	22.3171
genus.Prevotella9.id.11183	rs2683313	G	A	-0.0724576	0.0151603	10260	1.75788e-06	22.8386
genus.Prevotella9.id.11183	rs7232121	C	G	0.0671292	0.014423	9790	3.25038e-06	21.6583
genus.Prevotella9.id.11183	rs746764	C	T	-0.0915772	0.0193245	9385	2.14862e-06	22.4526
genus.Prevotella9.id.11183	rs9428102	G	A	-0.0778844	0.0176068	10264	9.70958e-06	19.5639
genus.RikenellaceaeRC9gutgroup.id.11191	rs17582787	G	A	-0.157739	0.0339924	3320	3.47693e-06	21.5206
genus.RikenellaceaeRC9gutgroup.id.11191	rs2900503	T	G	-0.172329	0.0326671	3320	1.32533e-07	27.8121
genus.RikenellaceaeRC9gutgroup.id.11191	rs2998141	C	T	-0.136346	0.0293073	3330	3.28239e-06	21.631
genus.RikenellaceaeRC9gutgroup.id.11191	rs4717843	T	G	-0.119376	0.0260548	3220	4.61155e-06	20.9792
genus.RikenellaceaeRC9gutgroup.id.11191	rs80309088	A	G	0.17405	0.0383423	3170	5.64226e-06	20.5929
genus.RikenellaceaeRC9gutgroup.id.11191	rs9887954	A	G	-0.114849	0.0249013	3330	3.98457e-06	21.2595
genus.Romboutsia.id.11347	rs10279978	G	A	-0.0622202	0.0127675	14143	1.09741e-06	23.7458
genus.Romboutsia.id.11347	rs61841503	A	G	0.092888	0.0171454	13568	6.03841e-08	29.3467
genus.Romboutsia.id.11347	rs62504452	G	A	-0.0710048	0.0156654	14178	5.8268e-06	20.5414
genus.Roseburia.id.2012	rs116270582	A	T	-0.153844	0.0329324	9099	2.98999e-06	21.8182
genus.Roseburia.id.2012	rs16910295	C	T	-0.0980434	0.020957	16648	2.89237e-06	21.884
genus.Roseburia.id.2012	rs2034589	C	G	0.0629765	0.0123489	17846	3.40079e-07	26.0047
genus.Roseburia.id.2012	rs2160994	C	T	0.0550687	0.0112481	17444	9.78986e-07	23.9663
genus.Roseburia.id.2012	rs2943022	C	T	0.0493786	0.0106763	17854	3.74513e-06	21.3887
genus.Roseburia.id.2012	rs4748237	C	G	0.0488326	0.0106404	17851	4.44637e-06	21.0597
genus.Roseburia.id.2012	rs6445851	A	G	-0.0497336	0.0108158	17851	4.26108e-06	21.1413
genus.Roseburia.id.2012	rs6930661	T	C	-0.0961587	0.0204975	16945	2.71544e-06	22.0052
genus.Roseburia.id.2012	rs9300744	T	C	-0.0588452	0.0126228	17854	3.13425e-06	21.7301
genus.Ruminiclostridium5.id.11355	rs10827477	G	A	-0.0547387	0.0115163	17391	2.00294e-06	22.5896
genus.Ruminiclostridium5.id.11355	rs113753996	C	T	0.0820689	0.0174463	16680	2.54991e-06	22.1259
genus.Ruminiclostridium5.id.11355	rs1492620	C	T	-0.0830505	0.0180073	17397	3.98725e-06	21.2685
genus.Ruminiclostridium5.id.11355	rs2286384	C	G	-0.0518814	0.0107482	17394	1.38624e-06	23.297
genus.Ruminiclostridium5.id.11355	rs243585	G	C	-0.0585939	0.0121017	16906	1.2867e-06	23.4402
genus.Ruminiclostridium5.id.11355	rs2482038	A	C	0.0518991	0.0108777	17396	1.83172e-06	22.7613
genus.Ruminiclostridium5.id.11355	rs6121460	A	G	0.0932955	0.0199206	17318	2.82197e-06	21.9314
genus.Ruminiclostridium5.id.11355	rs79968837	G	A	-0.0950311	0.0193507	16602	9.06233e-07	24.1148
genus.Ruminiclostridium6.id.11356	rs10829821	C	T	-0.097606	0.0216072	12802	6.26391e-06	20.4026
genus.Ruminiclostridium6.id.11356	rs11992182	C	A	0.0625299	0.0137876	13381	5.75375e-06	20.5653
genus.Ruminiclostridium6.id.11356	rs12362316	G	A	0.0743588	0.0154466	13381	1.47993e-06	23.1704
genus.Ruminiclostridium6.id.11356	rs1756364	T	G	0.0999189	0.0197169	12933	4.02671e-07	25.6775
genus.Ruminiclostridium6.id.11356	rs589368	A	G	-0.146727	0.0330138	6880	8.8139e-06	19.7469
genus.Ruminiclostridium6.id.11356	rs61060922	G	T	0.15913	0.0322283	8955	7.91022e-07	24.3741
genus.Ruminiclostridium6.id.11356	rs71414120	G	T	0.200894	0.0406434	5567	7.699e-07	24.423
genus.Ruminiclostridium6.id.11356	rs72991535	G	T	0.135604	0.0295174	9642	4.34776e-06	21.1007
genus.Ruminiclostridium6.id.11356	rs79968172	A	G	0.11614	0.0243083	12802	1.77252e-06	22.8235
genus.Ruminiclostridium9.id.11357	rs113048721	G	C	0.0600735	0.0132737	16719	6.0184e-06	20.4799
genus.Ruminiclostridium9.id.11357	rs115044523	A	G	-0.0980026	0.0202616	16107	1.31912e-06	23.3922
genus.Ruminiclostridium9.id.11357	rs12040548	T	G	0.0570422	0.0122359	16721	3.13347e-06	21.7304
genus.Ruminiclostridium9.id.11357	rs12419854	A	T	-0.0727975	0.0155594	16027	2.88736e-06	21.8873
genus.Ruminiclostridium9.id.11357	rs57665991	G	C	-0.0641507	0.0123339	16725	1.98021e-07	27.0491
genus.Ruminiclostridium9.id.11357	rs6082461	C	A	0.0586425	0.0131004	16650	7.59162e-06	20.0357
genus.Ruminiclostridium9.id.11357	rs73592673	T	A	-0.081629	0.0169515	15493	1.46865e-06	23.1856
genus.Ruminiclostridium9.id.11357	rs918449	G	A	-0.0950908	0.0197177	16725	1.41687e-06	23.2548
genus.Ruminiclostridium9.id.11357	rs9522712	C	T	0.0699728	0.0154939	16725	6.29747e-06	20.3932
genus.RuminococcaceaeNK4A214group.id.11358	rs114244418	G	C	-0.175266	0.0372779	7123	2.5812e-06	22.0989
genus.RuminococcaceaeNK4A214group.id.11358	rs11586410	A	G	-0.0863422	0.0169937	14822	3.7577e-07	25.8114
genus.RuminococcaceaeNK4A214group.id.11358	rs12642039	C	T	-0.0553003	0.0119397	15276	3.62826e-06	21.449
genus.RuminococcaceaeNK4A214group.id.11358	rs12731	G	A	-0.0527684	0.0115053	15288	4.50891e-06	21.0326
genus.RuminococcaceaeNK4A214group.id.11358	rs136761	A	G	-0.0587521	0.0119155	14822	8.19183e-07	24.3089
genus.RuminococcaceaeNK4A214group.id.11358	rs147475196	G	A	-0.133769	0.0295196	9917	5.85611e-06	20.5305
genus.RuminococcaceaeNK4A214group.id.11358	rs34576931	C	G	-0.0873312	0.0194886	14678	7.42442e-06	20.0779
genus.RuminococcaceaeNK4A214group.id.11358	rs35559912	C	T	-0.0925071	0.0203674	13976	5.57434e-06	20.6261
genus.RuminococcaceaeNK4A214group.id.11358	rs4814689	T	C	-0.1083	0.0230708	14009	2.67584e-06	22.0329
genus.RuminococcaceaeNK4A214group.id.11358	rs5994253	G	A	-0.0811302	0.0157621	15288	2.6444e-07	26.4899
genus.RuminococcaceaeNK4A214group.id.11358	rs73158814	G	C	-0.109257	0.0227458	13077	1.55996e-06	23.0691
genus.RuminococcaceaeNK4A214group.id.11358	rs7573569	C	T	0.107739	0.0233638	14822	4.00079e-06	21.2616
genus.RuminococcaceaeUCG002.id.11360	rs10916131	T	C	-0.069333	0.0146753	17097	2.30724e-06	22.3179
genus.RuminococcaceaeUCG002.id.11360	rs10927423	A	C	-0.0713617	0.0147712	17096	1.35759e-06	23.3371
genus.RuminococcaceaeUCG002.id.11360	rs116974815	A	C	-0.189731	0.0396566	5819	1.71555e-06	22.882
genus.RuminococcaceaeUCG002.id.11360	rs12463378	G	A	-0.0522061	0.0112086	16994	3.19825e-06	21.6912
genus.RuminococcaceaeUCG002.id.11360	rs2265670	G	C	-0.0512404	0.0109287	17096	2.75067e-06	21.9805
genus.RuminococcaceaeUCG002.id.11360	rs55793120	C	T	0.137396	0.027414	11669	5.3895e-07	25.1148
genus.RuminococcaceaeUCG002.id.11360	rs62374283	C	T	-0.0581341	0.0120654	17094	1.44836e-06	23.2126
genus.RuminococcaceaeUCG002.id.11360	rs67746927	G	C	-0.054237	0.0110357	16651	8.89283e-07	24.1512
genus.RuminococcaceaeUCG002.id.11360	rs7120052	C	A	0.0624796	0.0135523	17097	4.02178e-06	21.252
genus.RuminococcaceaeUCG002.id.11360	rs7155595	A	C	0.0569929	0.0116986	17084	1.1061e-06	23.7312
genus.RuminococcaceaeUCG002.id.11360	rs72874194	C	G	-0.0770289	0.016725	16651	4.1123e-06	21.2092
genus.RuminococcaceaeUCG002.id.11360	rs77564310	C	A	-0.0713093	0.0140855	17000	4.13595e-07	25.6268
genus.RuminococcaceaeUCG002.id.11360	rs79016051	T	C	-0.0887747	0.0189424	16937	2.77843e-06	21.9612
genus.RuminococcaceaeUCG003.id.11361	rs10490280	T	C	-0.0672094	0.0143309	14004	2.73e-06	21.9912
genus.RuminococcaceaeUCG003.id.11361	rs11243416	C	T	-0.0925653	0.0191203	14004	1.29e-06	23.4339
genus.RuminococcaceaeUCG003.id.11361	rs11831525	C	A	0.071227	0.0151814	14397	2.71e-06	22.0092
genus.RuminococcaceaeUCG003.id.11361	rs16959793	C	A	-0.062527	0.0131259	14412	1.9e-06	22.6892
genus.RuminococcaceaeUCG003.id.11361	rs3013089	A	G	-0.0551473	0.0120346	14408	4.6e-06	20.9955
genus.RuminococcaceaeUCG003.id.11361	rs4452755	C	A	-0.0634463	0.0134741	14406	2.49e-06	22.1694
genus.RuminococcaceaeUCG003.id.11361	rs4532474	A	G	0.0769231	0.017045	14412	6.39e-06	20.3639
genus.RuminococcaceaeUCG003.id.11361	rs6759615	G	A	0.102523	0.0200204	14410	3.04e-07	26.2202
genus.RuminococcaceaeUCG003.id.11361	rs73341548	G	T	-0.170045	0.0318674	6744	9.5e-08	28.4648
genus.RuminococcaceaeUCG004.id.11362	rs12125734	T	G	0.133972	0.0257417	8938	1.94552e-07	27.0804
genus.RuminococcaceaeUCG004.id.11362	rs516741	G	T	-0.0755412	0.0161951	9502	3.09463e-06	21.7524
genus.RuminococcaceaeUCG004.id.11362	rs6769553	G	A	0.0849743	0.0157451	9501	6.78081e-08	29.1202
genus.RuminococcaceaeUCG005.id.11363	rs10873449	C	T	0.0654843	0.0143973	16098	5.41e-06	20.685
genus.RuminococcaceaeUCG005.id.11363	rs10950694	C	T	0.0577628	0.011412	15821	4.16e-07	25.6164
genus.RuminococcaceaeUCG005.id.11363	rs114279581	G	A	-0.146604	0.0316034	8465	3.5e-06	21.514
genus.RuminococcaceaeUCG005.id.11363	rs12604884	T	G	0.0675317	0.0143745	16099	2.63e-06	22.0686
genus.RuminococcaceaeUCG005.id.11363	rs2893871	A	G	-0.073644	0.015548	16103	2.17e-06	22.4322
genus.RuminococcaceaeUCG005.id.11363	rs34781347	A	G	0.188685	0.0386484	6061	1.05e-06	23.8269
genus.RuminococcaceaeUCG005.id.11363	rs35166120	G	C	-0.0686153	0.0146252	16092	2.71e-06	22.0082
genus.RuminococcaceaeUCG005.id.11363	rs394449	T	A	0.0692909	0.0148712	15728	3.17e-06	21.7072
genus.RuminococcaceaeUCG005.id.11363	rs60081663	G	C	0.158082	0.0319586	9342	7.56e-07	24.4621
genus.RuminococcaceaeUCG005.id.11363	rs7449320	A	C	0.0599163	0.0130836	16095	4.66e-06	20.9691
genus.RuminococcaceaeUCG005.id.11363	rs7555878	G	A	0.0586677	0.0125277	16100	2.83e-06	21.928
genus.RuminococcaceaeUCG009.id.11366	rs12508214	T	C	-0.0774649	0.0168937	7511	4.53053e-06	21.0206
genus.RuminococcaceaeUCG009.id.11366	rs1550196	A	G	0.130842	0.0262478	7389	6.20071e-07	24.8421
genus.RuminococcaceaeUCG009.id.11366	rs2058609	G	A	0.0816464	0.017472	7510	2.9684e-06	21.8311
genus.RuminococcaceaeUCG009.id.11366	rs2192926	G	A	-0.089048	0.0192989	7511	3.94707e-06	21.2847
genus.RuminococcaceaeUCG009.id.11366	rs4079028	T	C	0.0915623	0.019936	7480	4.37329e-06	21.0882
genus.RuminococcaceaeUCG009.id.11366	rs4708333	G	T	-0.084033	0.0174757	7511	1.52021e-06	23.1161
genus.RuminococcaceaeUCG009.id.11366	rs61779334	C	G	-0.138137	0.0292072	6865	2.25014e-06	22.3622
genus.RuminococcaceaeUCG009.id.11366	rs8009993	C	G	-0.135936	0.0244857	7389	2.82961e-08	30.8126
genus.RuminococcaceaeUCG010.id.11367	rs12597105	A	G	0.0670855	0.0144415	12415	3.39533e-06	21.5756
genus.RuminococcaceaeUCG010.id.11367	rs2820282	C	A	-0.0592304	0.0125917	12865	2.55208e-06	22.1235
genus.RuminococcaceaeUCG010.id.11367	rs35506912	C	G	-0.0693743	0.0147926	12793	2.73457e-06	21.9909
genus.RuminococcaceaeUCG010.id.11367	rs682403	G	A	-0.0588161	0.0124671	12864	2.38537e-06	22.2531
genus.RuminococcaceaeUCG010.id.11367	rs6958419	T	C	-0.0585718	0.0124994	12870	2.78623e-06	21.955
genus.RuminococcaceaeUCG010.id.11367	rs7935775	T	A	-0.0631351	0.0137953	12864	4.7271e-06	20.9415
genus.RuminococcaceaeUCG011.id.11368	rs12636310	A	G	0.132725	0.0282037	3632	2.52669e-06	22.1339
genus.RuminococcaceaeUCG011.id.11368	rs12724320	T	C	-0.120881	0.0249229	3632	1.23349e-06	23.5113
genus.RuminococcaceaeUCG011.id.11368	rs1416041	C	A	-0.182339	0.0339898	3632	8.11624e-08	28.7623
genus.RuminococcaceaeUCG011.id.11368	rs2729556	T	C	-0.109097	0.0233699	3632	3.03744e-06	21.7808
genus.RuminococcaceaeUCG011.id.11368	rs79113084	T	C	-0.152166	0.0317519	3610	1.6486e-06	22.9536
genus.RuminococcaceaeUCG011.id.11368	rs9729514	G	A	0.184934	0.0394616	3632	2.78035e-06	21.9504
genus.RuminococcaceaeUCG013.id.11370	rs11581881	T	C	0.0661211	0.0144736	15730	4.91518e-06	20.8674
genus.RuminococcaceaeUCG013.id.11370	rs12189346	A	G	0.0684961	0.014558	16470	2.53818e-06	22.1347
genus.RuminococcaceaeUCG013.id.11370	rs12485353	A	G	-0.0607903	0.0130847	16771	3.38589e-06	21.5819
genus.RuminococcaceaeUCG013.id.11370	rs12781711	T	C	-0.0656129	0.0117477	16772	2.33442e-08	31.1906
genus.RuminococcaceaeUCG013.id.11370	rs16918863	C	A	0.111491	0.0240157	12643	3.44333e-06	21.5488
genus.RuminococcaceaeUCG013.id.11370	rs75088940	C	T	-0.0942968	0.0200712	15638	2.62588e-06	22.0694
genus.RuminococcaceaeUCG013.id.11370	rs76973485	T	G	0.194976	0.0418213	5299	3.12983e-06	21.7271
genus.RuminococcaceaeUCG014.id.11371	rs10941294	T	C	-0.122057	0.0260017	12615	2.67633e-06	22.0322
genus.RuminococcaceaeUCG014.id.11371	rs115777838	C	T	-0.18835	0.0386643	5674	1.10806e-06	23.7222
genus.RuminococcaceaeUCG014.id.11371	rs12638134	G	T	0.0582548	0.0119657	14403	1.12466e-06	23.6987
genus.RuminococcaceaeUCG014.id.11371	rs56105232	A	G	0.139276	0.0299132	9190	3.22415e-06	21.6736
genus.RuminococcaceaeUCG014.id.11371	rs72809222	C	T	0.0671775	0.0139838	13922	1.55563e-06	23.0747
genus.RuminococcaceaeUCG014.id.11371	rs995642	T	C	0.060048	0.0126417	14402	2.0342e-06	22.5593
genus.Ruminococcus1.id.11373	rs10769159	C	G	-0.0640277	0.0110059	16603	5.97108e-09	33.84
genus.Ruminococcus1.id.11373	rs11783695	T	G	-0.0734114	0.0161398	16606	5.40377e-06	20.6861
genus.Ruminococcus1.id.11373	rs17781867	T	C	0.0999271	0.0211728	14349	2.36314e-06	22.2715
genus.Ruminococcus1.id.11373	rs6493760	T	C	0.0535262	0.0115885	16126	3.85736e-06	21.3318
genus.Ruminococcus1.id.11373	rs7117576	G	A	0.0829505	0.0170891	16606	1.21003e-06	23.5584
genus.Ruminococcus1.id.11373	rs7583465	T	C	0.0527654	0.0112619	16588	2.7954e-06	21.9495
genus.Ruminococcus2.id.11374	rs10199274	C	G	0.0663725	0.0139465	14716	1.94e-06	22.6457
genus.Ruminococcus2.id.11374	rs2368224	G	T	0.199648	0.0438453	3026	5.28e-06	20.7202
genus.Ruminococcus2.id.11374	rs2997412	G	A	-0.0568439	0.0122325	15336	3.37e-06	21.5915
genus.Ruminococcus2.id.11374	rs58681734	G	A	0.0723875	0.0160787	15338	6.73e-06	20.266
genus.Ruminococcus2.id.11374	rs75140805	G	T	0.0836825	0.0176445	14249	2.11e-06	22.49
genus.Ruminococcus2.id.11374	rs7635831	A	G	0.0618344	0.0129031	14924	1.65e-06	22.9622
genus.Ruminococcus2.id.11374	rs78120384	G	A	-0.192815	0.0392045	6082	8.73e-07	24.1807
genus.Senegalimassilia.id.11160	rs11787826	A	C	0.081327	0.0171154	6923	2.0173e-06	22.572
genus.Senegalimassilia.id.11160	rs57512504	A	T	0.0819494	0.0172241	6923	1.95679e-06	22.6305
genus.Senegalimassilia.id.11160	rs7225245	A	G	0.079173	0.0170421	6923	3.38875e-06	21.5766
genus.Senegalimassilia.id.11160	rs72887800	A	T	-0.0822462	0.0175721	6923	2.86168e-06	21.9008
genus.Slackia.id.825	rs112764253	A	T	0.194714	0.0411598	5634	2.23775e-06	22.3713
genus.Slackia.id.825	rs12440440	G	A	0.0901934	0.0190582	6063	2.2176e-06	22.3893
genus.Slackia.id.825	rs16894137	T	C	-0.122792	0.0263047	6063	3.04039e-06	21.7837
genus.Slackia.id.825	rs4492265	G	A	-0.0905757	0.0191658	6063	2.29108e-06	22.3267
genus.Slackia.id.825	rs58767323	C	G	-0.102833	0.0227077	6063	5.93846e-06	20.5012
genus.Slackia.id.825	rs8901	T	C	0.0934594	0.0186813	6063	5.64943e-07	25.0201
genus.Streptococcus.id.1853	rs10448310	G	A	-0.0517935	0.0111324	16384	3.27908e-06	21.6433
genus.Streptococcus.id.1853	rs11110281	C	T	-0.137519	0.0227398	15120	1.47116e-09	36.5673
genus.Streptococcus.id.1853	rs11720390	A	G	0.107024	0.0228121	15220	2.71167e-06	22.0076
genus.Streptococcus.id.1853	rs17708276	G	A	-0.0793955	0.0170628	16278	3.26905e-06	21.6491
genus.Streptococcus.id.1853	rs1918540	A	G	0.059639	0.0128148	16373	3.25691e-06	21.6563
genus.Streptococcus.id.1853	rs395407	C	G	-0.0792781	0.0173697	15864	5.01521e-06	20.8288
genus.Streptococcus.id.1853	rs6806351	C	T	-0.0633829	0.0136647	15973	3.51076e-06	21.5123
genus.Streptococcus.id.1853	rs72739637	G	A	0.0959942	0.0193213	14920	6.75359e-07	24.6809
genus.Streptococcus.id.1853	rs77558518	G	A	-0.103999	0.0229714	14949	5.97301e-06	20.4941
genus.Streptococcus.id.1853	rs7916711	G	A	0.102891	0.0217362	15294	2.20555e-06	22.4042
genus.Streptococcus.id.1853	rs957755	G	T	-0.0697379	0.0143725	16387	1.22112e-06	23.5408
genus.Streptococcus.id.1853	rs9895557	C	T	-0.0514931	0.0112021	16387	4.29184e-06	21.1273
genus.Streptococcus.id.1853	rs9903102	A	C	-0.0709483	0.0155275	16384	4.89574e-06	20.8751
genus.Subdoligranulum.id.2070	rs10065321	C	T	-0.0512828	0.0108105	17589	2.09763e-06	22.5009
genus.Subdoligranulum.id.2070	rs12638227	C	G	-0.0557288	0.0108552	17165	2.83905e-07	26.3531
genus.Subdoligranulum.id.2070	rs2114677	T	C	-0.104176	0.0230829	15566	6.38737e-06	20.3658
genus.Subdoligranulum.id.2070	rs2171249	T	C	0.106744	0.0233213	14679	4.7147e-06	20.947
genus.Subdoligranulum.id.2070	rs35940633	A	G	-0.0511008	0.011001	17582	3.39919e-06	21.5745
genus.Subdoligranulum.id.2070	rs3761728	G	T	-0.0543458	0.0118866	17570	4.8305e-06	20.901
genus.Subdoligranulum.id.2070	rs4347804	G	A	0.166063	0.0357483	4312	3.39515e-06	21.5692
genus.Subdoligranulum.id.2070	rs6555306	C	T	-0.0740777	0.0155463	17591	1.88877e-06	22.7024
genus.Subdoligranulum.id.2070	rs76664262	A	T	0.0834078	0.0185357	16712	6.79998e-06	20.2463
genus.Sutterella.id.2896	rs13173038	G	A	-0.0718076	0.0151627	13245	2.18189e-06	22.4245
genus.Sutterella.id.2896	rs143438747	C	T	-0.145793	0.0306867	9368	2.02408e-06	22.5672
genus.Sutterella.id.2896	rs2321387	A	G	-0.0592876	0.0124509	13252	1.91964e-06	22.6704
genus.Sutterella.id.2896	rs7499539	G	A	0.0617478	0.0130998	13254	2.43342e-06	22.215
genus.Terrisporobacter.id.11348	rs1883097	T	C	0.226399	0.0454642	4417	6.36768e-07	24.7864
genus.Terrisporobacter.id.11348	rs2872237	A	C	-0.0814505	0.0175943	6632	3.66789e-06	21.4246
genus.Terrisporobacter.id.11348	rs7034891	C	G	-0.0799209	0.0173794	6629	4.25314e-06	21.1409
genus.Turicibacter.id.2162	rs11054680	C	T	-0.104751	0.0226998	8928	3.93774e-06	21.2901
genus.Turicibacter.id.2162	rs11649454	C	G	0.0950891	0.0203433	8943	2.95081e-06	21.8434
genus.Turicibacter.id.2162	rs12603364	C	T	0.110861	0.0225598	8923	8.91992e-07	24.1428
genus.Turicibacter.id.2162	rs149744580	G	A	0.169883	0.0315478	8459	7.24754e-08	28.9905
genus.Turicibacter.id.2162	rs2221441	C	G	0.0710364	0.015343	8720	3.65876e-06	21.4309
genus.Turicibacter.id.2162	rs2834977	C	T	-0.0959995	0.0208261	8946	4.03489e-06	21.2435
genus.Turicibacter.id.2162	rs4869133	A	G	0.131186	0.027197	8256	1.41021e-06	23.2611
genus.Turicibacter.id.2162	rs55756211	C	T	-0.115115	0.0240708	8941	1.73243e-06	22.8659
genus.Turicibacter.id.2162	rs61265175	C	G	-0.0858591	0.0185778	8941	3.80783e-06	21.3545
genus.Tyzzerella3.id.11335	rs17706273	C	T	-0.140368	0.0274708	5395	3.22618e-07	26.0997
genus.Tyzzerella3.id.11335	rs17809157	T	A	-0.163819	0.0336386	4621	1.1161e-06	23.7064
genus.Tyzzerella3.id.11335	rs4904512	C	T	-0.117151	0.0250306	5396	2.86433e-06	21.8972
genus.Tyzzerella3.id.11335	rs55799124	G	A	-0.11435	0.0238604	5362	1.64747e-06	22.9591
genus.Tyzzerella3.id.11335	rs67476743	G	T	0.132164	0.022208	4948	2.66216e-09	35.4022
genus.Tyzzerella3.id.11335	rs6920448	T	C	-0.141081	0.0305446	5010	3.85884e-06	21.3252
genus.Tyzzerella3.id.11335	rs7019909	C	T	0.144156	0.0301626	5396	1.75931e-06	22.833
genus.Tyzzerella3.id.11335	rs7333521	C	T	-0.207191	0.0453121	4335	4.81834e-06	20.8985
genus.Tyzzerella3.id.11335	rs75091807	T	G	-0.184966	0.0383029	4621	1.37194e-06	23.3095
genus.Tyzzerella3.id.11335	rs7561370	C	T	0.131341	0.0286292	5396	4.48253e-06	21.0388
genus.Veillonella.id.2198	rs12679709	G	C	-0.0793499	0.0164818	9290	1.47643e-06	23.1735
genus.Veillonella.id.2198	rs1882878	G	A	-0.0768966	0.0163908	9282	2.7129e-06	22.0049
genus.Veillonella.id.2198	rs2013594	C	T	-0.0720698	0.0155153	9283	3.39954e-06	21.5721
genus.Veillonella.id.2198	rs62376424	T	C	-0.0762216	0.0163499	8999	3.1331e-06	21.7284
genus.Veillonella.id.2198	rs742016	G	A	-0.0688571	0.0149769	9279	4.27489e-06	21.1329
genus.Veillonella.id.2198	rs7645873	T	A	0.0761385	0.0164228	9286	3.54941e-06	21.4894
genus.LachnospiraceaeNK4A136group.id.11319	rs12362320	C	G	0.0573168	0.0115466	16764	6.90765e-07	24.6378
genus.LachnospiraceaeNK4A136group.id.11319	rs160061	G	A	0.0513831	0.0108094	17234	1.99873e-06	22.5936
genus.LachnospiraceaeNK4A136group.id.11319	rs68104925	C	T	-0.0549104	0.0115385	17227	1.94668e-06	22.6443
genus.LachnospiraceaeNK4A136group.id.11319	rs73044693	G	A	-0.10758	0.0229884	12773	2.87241e-06	21.8965
genus.LachnospiraceaeNK4A136group.id.11319	rs7616165	T	G	-0.230542	0.0483465	4094	1.85566e-06	22.7279
genus.LachnospiraceaeNK4A136group.id.11319	rs76193507	G	A	-0.22973	0.0499776	3578	4.29305e-06	21.1175
genus.LachnospiraceaeNK4A136group.id.11319	rs7832116	G	A	-0.0714756	0.0151703	17219	2.45845e-06	22.1961
genus.LachnospiraceaeNK4A136group.id.11319	rs954878	G	A	-0.0520656	0.0109082	17227	1.81445e-06	22.7795
genus.Peptococcus.id.2037	rs10031059	C	T	-0.121167	0.0225844	5526	8.09252e-08	28.7734
genus.Peptococcus.id.2037	rs11001948	A	C	-0.191013	0.038102	5607	5.35342e-07	25.1231
genus.Peptococcus.id.2037	rs11030569	T	A	-0.17402	0.0374133	5329	3.29871e-06	21.6263
genus.Peptococcus.id.2037	rs2054133	A	G	0.0895433	0.0188332	5657	1.98884e-06	22.5978
genus.Peptococcus.id.2037	rs34282744	C	G	0.191797	0.0399832	5257	1.61104e-06	23.0019
genus.Peptococcus.id.2037	rs413827	A	G	0.110229	0.0237523	5482	3.47093e-06	21.529
genus.Peptococcus.id.2037	rs5770862	C	T	0.162018	0.0356813	5431	5.60708e-06	20.6103
genus.Peptococcus.id.2037	rs57905414	A	T	0.184818	0.0322855	5483	1.03753e-08	32.7577
genus.Peptococcus.id.2037	rs62424012	A	G	0.137164	0.0292136	5656	2.66331e-06	22.0372
genus.Peptococcus.id.2037	rs7033353	G	T	0.090152	0.018995	5657	2.07388e-06	22.5174
genus.Peptococcus.id.2037	rs7766680	C	G	0.0976832	0.0214155	5655	5.08301e-06	20.7984
genus.Peptococcus.id.2037	rs77681628	T	C	0.200307	0.0387328	4842	2.32198e-07	26.7336
genus.Sellimonas.id.14369	rs13417181	C	T	0.166509	0.0337521	3047	8.09e-07	24.3214
genus.Sellimonas.id.14369	rs2187447	C	A	0.243457	0.0527695	3028	3.96e-06	21.2712
genus.Sellimonas.id.14369	rs2371572	C	A	0.127349	0.0250862	3154	3.85e-07	25.754
genus.Sellimonas.id.14369	rs56203279	C	T	-0.124045	0.0269115	3154	4.04e-06	21.2328
genus.Sellimonas.id.14369	rs6433790	T	C	-0.13853	0.0301698	3095	4.4e-06	21.0699
genus.Victivallis.id.2256	rs11899949	A	G	0.130568	0.0276239	3258	2.2828e-06	22.3273
genus.Victivallis.id.2256	rs12512543	C	A	-0.178036	0.0374344	3239	1.97521e-06	22.605
genus.Victivallis.id.2256	rs4764863	A	G	0.121561	0.0246058	3266	7.79946e-07	24.3918
genus.Victivallis.id.2256	rs4895919	C	T	-0.116918	0.0247515	3254	2.31655e-06	22.2991
genus.Victivallis.id.2256	rs56349194	G	A	-0.158501	0.0315231	3266	4.95363e-07	25.2663
genus.Victivallis.id.2256	rs592514	A	T	-0.181449	0.0391678	3241	3.61087e-06	21.4478
genus.Victivallis.id.2256	rs6445926	C	G	0.117031	0.0249764	3267	2.79061e-06	21.942
order.Actinomycetales.id.420	rs2889192	T	G	0.0884052	0.0194997	7711	5.79669e-06	20.5489
order.Actinomycetales.id.420	rs35011108	G	A	0.241546	0.0503803	3630	1.63121e-06	22.9741
order.Bacillales.id.1674	rs10233278	C	T	-0.116319	0.0248527	3239	2.86e-06	21.8918
order.Bacillales.id.1674	rs4617108	G	A	0.248861	0.0525929	3018	2.22e-06	22.3754
order.Bacillales.id.1674	rs62640857	G	A	0.148238	0.0326455	3018	5.6e-06	20.6054
order.Bacillales.id.1674	rs74420793	G	A	-0.164413	0.0353763	3077	3.36e-06	21.5856
order.Bacillales.id.1674	rs74887130	G	C	-0.192166	0.0358817	3218	8.53e-08	28.6639
order.Bacteroidales.id.913	rs111845179	C	T	0.102648	0.0213843	16393	1.58545e-06	23.0387
order.Bacteroidales.id.913	rs12938514	G	A	-0.199979	0.0416024	3350	1.53276e-06	23.0926
order.Bacteroidales.id.913	rs13291434	C	T	0.0694656	0.0149789	17400	3.52569e-06	21.5044
order.Bacteroidales.id.913	rs2032750	C	T	-0.0508393	0.0106807	17853	1.93683e-06	22.6542
order.Bacteroidales.id.913	rs55773148	A	G	-0.121514	0.0236759	11349	2.8611e-07	26.3366
order.Bacteroidales.id.913	rs73846128	G	A	-0.0648523	0.013349	18334	1.18451e-06	23.5996
order.Bacteroidales.id.913	rs7546249	A	T	-0.0567113	0.0118386	18333	1.66472e-06	22.9452
order.Bacteroidales.id.913	rs929878	T	C	-0.0548532	0.012153	18334	6.37455e-06	20.3701
order.Bifidobacteriales.id.432	rs10841473	C	G	-0.0613031	0.0128844	14914	1.95601e-06	22.6347
order.Bifidobacteriales.id.432	rs13020688	A	G	0.0584045	0.0122081	14795	1.71788e-06	22.8841
order.Bifidobacteriales.id.432	rs182549	T	C	0.11707	0.0126703	14915	2.47237e-20	85.3602
order.Bifidobacteriales.id.432	rs1961273	T	C	0.0688125	0.0131699	14915	1.74176e-07	27.2967
order.Bifidobacteriales.id.432	rs4567981	A	T	0.0577763	0.0117388	14795	8.57486e-07	24.2209
order.Bifidobacteriales.id.432	rs4957061	C	T	0.0569873	0.0116907	14795	1.09047e-06	23.7582
order.Bifidobacteriales.id.432	rs7322849	C	T	0.110676	0.0200996	14915	3.66295e-08	30.3161
order.Bifidobacteriales.id.432	rs73797465	G	T	-0.0942612	0.0208421	14795	6.10764e-06	20.4514
order.Bifidobacteriales.id.432	rs7588568	C	A	-0.060716	0.0130605	14913	3.33838e-06	21.6086
order.Bifidobacteriales.id.432	rs76671854	G	C	-0.0892981	0.0183177	13923	1.08827e-06	23.7619
order.Bifidobacteriales.id.432	rs857444	T	C	0.0553965	0.0120669	14914	4.41618e-06	21.0723
order.Burkholderiales.id.2874	rs1928341	G	A	0.0507782	0.0110587	17096	4.3965e-06	21.0812
order.Burkholderiales.id.2874	rs2321387	A	G	-0.0508514	0.0109588	17095	3.47992e-06	21.5294
order.Burkholderiales.id.2874	rs2367850	C	G	0.06333	0.0130595	16664	1.23874e-06	23.5133
order.Burkholderiales.id.2874	rs2613606	T	C	-0.0499561	0.0109264	17092	4.82943e-06	20.9013
order.Burkholderiales.id.2874	rs4033856	T	C	0.0833446	0.0167489	15897	6.4872e-07	24.7586
order.Burkholderiales.id.2874	rs6087811	G	T	-0.101587	0.0198817	16135	3.22898e-07	26.1044
order.Burkholderiales.id.2874	rs62191117	G	A	0.0679995	0.0132471	16975	2.84893e-07	26.3464
order.Burkholderiales.id.2874	rs62395635	C	T	0.109911	0.0236375	15062	3.32163e-06	21.6183
order.Burkholderiales.id.2874	rs72747231	G	C	-0.133729	0.0290738	11315	4.23252e-06	21.1528
order.Burkholderiales.id.2874	rs7638039	C	T	0.0580987	0.012673	17078	4.55217e-06	21.0146
order.Clostridiales.id.1863	rs10774377	G	A	0.0523003	0.0113859	18330	4.36047e-06	21.0972
order.Clostridiales.id.1863	rs112334273	A	G	0.0639383	0.0127404	18217	5.2068e-07	25.1829
order.Clostridiales.id.1863	rs13179700	C	T	0.0510953	0.0109569	18338	3.11173e-06	21.744
order.Clostridiales.id.1863	rs2273429	G	A	-0.0726191	0.0153105	18337	2.10488e-06	22.4944
order.Clostridiales.id.1863	rs6814436	C	T	0.0741858	0.0150814	18336	8.69747e-07	24.1942
order.Clostridiales.id.1863	rs6815608	C	T	0.104089	0.0210883	16731	7.97965e-07	24.3598
order.Clostridiales.id.1863	rs72915163	C	T	-0.0580246	0.0120558	18317	1.48669e-06	23.1626
order.Coriobacteriales.id.810	rs11250875	C	T	0.06075	0.0130939	17690	3.49138e-06	21.5232
order.Coriobacteriales.id.810	rs1816223	G	A	-0.0586265	0.0129006	17688	5.50697e-06	20.65
order.Coriobacteriales.id.810	rs240104	C	T	-0.0603429	0.0126849	17577	1.96432e-06	22.6271
order.Coriobacteriales.id.810	rs34739816	T	G	0.0965017	0.0207666	16593	3.36847e-06	21.5917
order.Coriobacteriales.id.810	rs719099	G	A	0.0778402	0.0155815	17687	5.86301e-07	24.954
order.Coriobacteriales.id.810	rs80046645	G	C	0.25584	0.0561995	3204	5.30506e-06	20.7109
order.Desulfovibrionales.id.3156	rs112381107	T	C	0.21009	0.0456974	4455	4.27747e-06	21.1268
order.Desulfovibrionales.id.3156	rs11599763	C	T	-0.0554862	0.0117486	15144	2.32646e-06	22.3017
order.Desulfovibrionales.id.3156	rs16851319	C	G	-0.0729137	0.0150954	15130	1.36409e-06	23.3276
order.Desulfovibrionales.id.3156	rs17791387	G	A	-0.0727501	0.0154369	15047	2.44424e-06	22.2068
order.Desulfovibrionales.id.3156	rs2692012	G	A	0.112244	0.0253553	13082	9.5622e-06	19.5939
order.Desulfovibrionales.id.3156	rs2838334	A	G	0.0569024	0.0124223	15144	4.63523e-06	20.9796
order.Desulfovibrionales.id.3156	rs4506934	T	C	-0.0953383	0.0201367	15037	2.19535e-06	22.413
order.Desulfovibrionales.id.3156	rs6058181	T	C	0.0836765	0.0166098	14418	4.70959e-07	25.3757
order.Desulfovibrionales.id.3156	rs9928243	A	C	-0.0544713	0.0117811	15143	3.77093e-06	21.3751
order.Enterobacteriales.id.3468	rs111229068	T	A	0.110561	0.0241719	12350	4.78626e-06	20.9176
order.Enterobacteriales.id.3468	rs2374343	G	C	0.0584029	0.0126351	13576	3.79567e-06	21.3622
order.Enterobacteriales.id.3468	rs6092361	G	A	0.060255	0.0129095	13518	3.04883e-06	21.7824
order.Enterobacteriales.id.3468	rs78143293	G	A	-0.0848521	0.0170415	13572	6.38673e-07	24.7882
order.Erysipelotrichales.id.2148	rs10781552	T	C	-0.0552212	0.0116074	17789	1.96096e-06	22.6304
order.Erysipelotrichales.id.2148	rs17530232	G	A	0.10305	0.0224648	16622	4.49263e-06	21.0397
order.Erysipelotrichales.id.2148	rs2300774	A	G	0.0524152	0.0106784	18216	9.17591e-07	24.0911
order.Erysipelotrichales.id.2148	rs35161940	C	T	-0.0806041	0.0167641	18213	1.52343e-06	23.1157
order.Erysipelotrichales.id.2148	rs4078432	T	C	-0.0608929	0.0133764	17789	5.30679e-06	20.7209
order.Erysipelotrichales.id.2148	rs62504403	T	C	0.0681159	0.0127883	16981	1.00175e-07	28.3673
order.Erysipelotrichales.id.2148	rs7234058	C	T	-0.0945759	0.0194091	16874	1.10047e-06	23.741
order.Erysipelotrichales.id.2148	rs8003149	T	C	0.0538798	0.0116888	18213	4.03592e-06	21.2454
order.Gastranaerophilales.id.1591	rs11150282	C	T	0.098235	0.0197127	5864	6.24938e-07	24.8253
order.Gastranaerophilales.id.1591	rs1221147	A	T	0.126305	0.0279161	5759	6.05541e-06	20.4635
order.Gastranaerophilales.id.1591	rs16851659	C	G	-0.0895168	0.0186555	5875	1.59931e-06	23.0169
order.Gastranaerophilales.id.1591	rs4129395	A	G	0.0904264	0.0185253	5878	1.05426e-06	23.8183
order.Gastranaerophilales.id.1591	rs73074665	T	A	0.164631	0.0356037	5749	3.76416e-06	21.3739
order.Gastranaerophilales.id.1591	rs79790072	C	T	0.226103	0.0488017	4104	3.60246e-06	21.4551
order.Gastranaerophilales.id.1591	rs9864379	C	T	-0.160521	0.0292752	5768	4.1774e-08	30.0549
order.Lactobacillales.id.1800	rs11110282	G	A	-0.10239	0.0217849	15956	2.6e-06	22.0875
order.Lactobacillales.id.1800	rs1962325	G	C	0.0546878	0.0115069	17274	2.01e-06	22.5845
order.Lactobacillales.id.1800	rs34989881	G	A	0.113479	0.0246452	12921	4.13e-06	21.1982
order.Lactobacillales.id.1800	rs35344081	A	G	0.0642442	0.0127358	17292	4.55e-07	25.4427
order.Lactobacillales.id.1800	rs4028634	C	T	0.0532915	0.01101	17295	1.3e-06	23.4257
order.Lactobacillales.id.1800	rs57872228	T	C	-0.0688415	0.0146994	17293	2.82e-06	21.9306
order.Lactobacillales.id.1800	rs74352383	A	T	-0.103396	0.021758	16442	2.01e-06	22.5799
order.Lactobacillales.id.1800	rs76717940	A	T	0.160943	0.0327	7976	8.58e-07	24.218
order.Lactobacillales.id.1800	rs77558518	G	A	-0.106466	0.0223484	15758	1.9e-06	22.6921
order.Lactobacillales.id.1800	rs78938557	C	T	0.10553	0.0233581	15152	6.24e-06	20.409
order.Lactobacillales.id.1800	rs9581006	T	C	0.22583	0.0469228	4224	1.49e-06	23.152
order.Methanobacteriales.id.120	rs10202904	G	T	-0.121754	0.0235357	3695	2.30182e-07	26.747
order.Methanobacteriales.id.120	rs62241835	T	G	-0.203385	0.0417931	3383	1.13601e-06	23.6687
order.Methanobacteriales.id.120	rs73457410	G	A	0.21534	0.0436695	3498	8.17584e-07	24.3021
order.Methanobacteriales.id.120	rs894996	A	C	0.216999	0.0449076	3582	1.35081e-06	23.3364
order.MollicutesRF9.id.11579	rs17235252	C	T	-0.122002	0.0255463	9531	1.79059e-06	22.8028
order.MollicutesRF9.id.11579	rs739151	G	C	0.0652659	0.0139773	10337	3.02042e-06	21.7993
order.MollicutesRF9.id.11579	rs74603314	C	T	0.230767	0.0489701	4033	2.44806e-06	22.1958
order.MollicutesRF9.id.11579	rs7706512	A	G	0.0657351	0.0138979	10359	2.24686e-06	22.3672
order.NB1n.id.3953	rs11251024	A	G	0.104201	0.0206737	5107	4.64872e-07	25.3944
order.NB1n.id.3953	rs11606187	G	A	-0.154539	0.0326288	5102	2.17674e-06	22.4236
order.NB1n.id.3953	rs13219468	C	G	0.115344	0.0236958	5104	1.12913e-06	23.6851
order.NB1n.id.3953	rs13385922	C	T	0.0929494	0.0201348	5106	3.90545e-06	21.3024
order.NB1n.id.3953	rs2172426	T	C	-0.10212	0.0198947	5099	2.85118e-07	26.3376
order.NB1n.id.3953	rs267959	G	A	0.0988612	0.0209676	5107	2.41758e-06	22.2221
order.NB1n.id.3953	rs4383094	C	T	0.149188	0.0320662	5091	3.27936e-06	21.6372
order.NB1n.id.3953	rs55921101	T	A	-0.109245	0.0236201	5105	3.74399e-06	21.3833
order.NB1n.id.3953	rs60583455	C	T	0.108934	0.021177	4773	2.68995e-07	26.4493
order.NB1n.id.3953	rs72671304	C	T	0.172322	0.0370028	4887	3.20862e-06	21.6787
order.NB1n.id.3953	rs7911787	T	G	-0.223071	0.0470232	3879	2.09709e-06	22.4924
order.Pasteurellales.id.3688	rs10840326	G	C	-0.0717634	0.0149229	9154	1.51737e-06	23.1208
order.Pasteurellales.id.3688	rs10965428	A	C	-0.119902	0.0258219	8873	3.4268e-06	21.5565
order.Pasteurellales.id.3688	rs12191680	G	C	0.102214	0.0197189	9408	2.17733e-07	26.8632
order.Pasteurellales.id.3688	rs35510	G	A	0.122729	0.0264958	8671	3.62105e-06	21.4507
order.Pasteurellales.id.3688	rs4822728	C	T	0.0685479	0.0149032	9412	4.23444e-06	21.1512
order.Pasteurellales.id.3688	rs6092684	T	A	0.0684647	0.014674	9366	3.07538e-06	21.7643
order.Pasteurellales.id.3688	rs72756943	A	G	0.13988	0.0303029	8020	3.91089e-06	21.3027
order.Pasteurellales.id.3688	rs76022354	T	C	0.24289	0.0500406	3692	1.21086e-06	23.5471
order.Pasteurellales.id.3688	rs78909003	C	T	-0.241159	0.0498372	3638	1.30532e-06	23.4025
order.Pasteurellales.id.3688	rs9382510	T	C	-0.0881865	0.0169965	9410	2.11976e-07	26.915
order.Rhodospirillales.id.2667	rs1035406	A	G	-0.114725	0.0247994	8585	3.72574e-06	21.396
order.Rhodospirillales.id.2667	rs11591293	T	G	0.0722755	0.0158186	8602	4.9e-06	20.8711
order.Rhodospirillales.id.2667	rs11630875	C	T	0.0945198	0.0202139	8595	2.92543e-06	21.8598
order.Rhodospirillales.id.2667	rs2162883	T	C	0.090131	0.0193257	8602	3.10439e-06	21.7459
order.Rhodospirillales.id.2667	rs3754624	T	C	0.094128	0.0198389	8598	2.08905e-06	22.5061
order.Rhodospirillales.id.2667	rs4278423	C	T	0.105215	0.0233778	8603	6.77474e-06	20.2511
order.Rhodospirillales.id.2667	rs7001029	T	C	0.120726	0.0260989	8063	3.73346e-06	21.3917
order.Rhodospirillales.id.2667	rs76784716	G	A	0.136039	0.0284399	8600	1.72361e-06	22.8755
order.Rhodospirillales.id.2667	rs9813022	G	A	-0.0830795	0.0162642	8600	3.25357e-07	26.087
order.Selenomonadales.id.2165	rs13086907	A	G	0.0625312	0.0131735	18163	2.06721e-06	22.5291
order.Selenomonadales.id.2165	rs1447205	C	G	-0.0502053	0.0108382	18165	3.61703e-06	21.4554
order.Selenomonadales.id.2165	rs1643968	C	T	-0.0565284	0.0112298	18170	4.80887e-07	25.3362
order.Selenomonadales.id.2165	rs4722181	G	T	0.0501306	0.0105798	18163	2.15486e-06	22.4493
order.Selenomonadales.id.2165	rs60274479	C	T	-0.0659623	0.0134137	17610	8.76408e-07	24.1794
order.Selenomonadales.id.2165	rs61249479	C	A	0.0777075	0.0168628	18165	4.06137e-06	21.2333
order.Selenomonadales.id.2165	rs71405394	A	G	-0.114178	0.02405	13861	2.05919e-06	22.5358
order.Selenomonadales.id.2165	rs73232831	A	G	-0.151829	0.0314932	9382	1.42835e-06	23.2372
order.Verrucomicrobiales.id.4030	rs11184341	C	G	0.0655342	0.0142231	11864	4.07352e-06	21.2264
order.Verrucomicrobiales.id.4030	rs111862613	C	T	0.090699	0.0196746	11621	4.02761e-06	21.248
order.Verrucomicrobiales.id.4030	rs117107102	G	A	0.204683	0.0431573	4975	2.10865e-06	22.4844
order.Verrucomicrobiales.id.4030	rs11729256	C	T	0.0749798	0.0150177	11861	5.95195e-07	24.9235
order.Verrucomicrobiales.id.4030	rs12908520	A	G	0.0618926	0.0130946	11863	2.28353e-06	22.3366
order.Verrucomicrobiales.id.4030	rs2602429	T	C	0.0746844	0.0156194	11690	1.73987e-06	22.8589
order.Verrucomicrobiales.id.4030	rs4242783	A	G	0.0689292	0.0147693	11690	3.05538e-06	21.7777
order.Verrucomicrobiales.id.4030	rs4936098	G	A	0.0648843	0.0135928	11858	1.81119e-06	22.7817
order.Verrucomicrobiales.id.4030	rs74542928	C	T	0.112164	0.0236422	11216	2.09314e-06	22.5036
order.Verrucomicrobiales.id.4030	rs9349825	G	A	-0.0704036	0.0147128	11858	1.70821e-06	22.8942
order.Victivallales.id.2254	rs11770843	T	C	0.109431	0.0234879	4705	3.17698e-06	21.6974
order.Victivallales.id.2254	rs17114848	A	G	0.152377	0.0324332	4734	2.62487e-06	22.0636
order.Victivallales.id.2254	rs2031282	G	A	0.122369	0.0270329	4734	5.99274e-06	20.4819
order.Victivallales.id.2254	rs2731834	G	C	0.109438	0.023693	4733	3.85603e-06	21.3261
order.Victivallales.id.2254	rs2825714	G	A	-0.13741	0.0289246	4734	2.02778e-06	22.559
order.Victivallales.id.2254	rs62570196	T	C	-0.21635	0.0439866	3712	8.71847e-07	24.1792
order.Victivallales.id.2254	rs77599476	G	A	0.230292	0.0480168	3722	1.61812e-06	22.9899
phylum.Actinobacteria.id.400	rs10841473	C	G	-0.0596572	0.0117537	17987	3.86244e-07	25.759
phylum.Actinobacteria.id.400	rs1397793	A	G	-0.0521387	0.0111587	17782	2.97622e-06	21.8294
phylum.Actinobacteria.id.400	rs4429415	T	C	0.0581908	0.0111343	17990	1.72988e-07	27.3106
phylum.Actinobacteria.id.400	rs55888705	G	A	0.0534221	0.0109975	17988	1.18789e-06	23.5941
phylum.Actinobacteria.id.400	rs62448869	A	T	-0.0524531	0.0108226	17782	1.25573e-06	23.4872
phylum.Actinobacteria.id.400	rs6496870	C	T	0.0510777	0.0113809	17990	7.18855e-06	20.1402
phylum.Actinobacteria.id.400	rs74037001	A	G	-0.0819391	0.0165334	17179	7.19645e-07	24.5589
phylum.Actinobacteria.id.400	rs7570971	C	A	0.086653	0.0113623	17782	2.41454e-14	58.155
phylum.Actinobacteria.id.400	rs8047955	G	A	0.0521115	0.0111192	17980	2.77761e-06	21.9619
phylum.Actinobacteria.id.400	rs857444	T	C	0.0507315	0.0109885	17988	3.89703e-06	21.3125
phylum.Actinobacteria.id.400	rs9833771	C	T	0.0490077	0.0106564	17990	4.24747e-06	21.1474
phylum.Bacteroidetes.id.905	rs111845179	C	T	0.104177	0.0213837	16394	1.10592e-06	23.7314
phylum.Bacteroidetes.id.905	rs12938514	G	A	-0.201089	0.0415995	3350	1.33862e-06	23.3529
phylum.Bacteroidetes.id.905	rs13291434	C	T	0.0705818	0.014978	17401	2.44878e-06	22.2037
phylum.Bacteroidetes.id.905	rs2032750	C	T	-0.0510857	0.0106804	17854	1.72602e-06	22.8756
phylum.Bacteroidetes.id.905	rs62575403	T	C	0.145424	0.0311079	9669	2.94203e-06	21.8495
phylum.Bacteroidetes.id.905	rs73512608	A	G	-0.123117	0.0236743	11350	1.98805e-07	27.0399
phylum.Bacteroidetes.id.905	rs73846128	G	A	-0.0664262	0.0133481	18335	6.47645e-07	24.7622
phylum.Bacteroidetes.id.905	rs7546249	A	T	-0.0569173	0.0118382	18334	1.52507e-06	23.1136
phylum.Cyanobacteria.id.1500	rs2314810	G	C	-0.218257	0.0464571	3934	2.62693e-06	22.0602
phylum.Cyanobacteria.id.1500	rs2553290	T	A	0.0962131	0.0202617	7113	2.04901e-06	22.5422
phylum.Cyanobacteria.id.1500	rs584122	T	C	-0.151774	0.0326827	6922	3.41966e-06	21.5592
phylum.Cyanobacteria.id.1500	rs76531781	C	T	-0.231868	0.0493393	3658	2.60855e-06	22.0728
phylum.Cyanobacteria.id.1500	rs789068	A	G	-0.111385	0.0212922	7110	1.6836e-07	27.3584
phylum.Cyanobacteria.id.1500	rs9864379	C	T	-0.138933	0.0268045	6922	2.18096e-07	26.8579
phylum.Euryarchaeota.id.55	rs10202904	G	T	-0.115986	0.0230271	3861	4.73065e-07	25.3575
phylum.Euryarchaeota.id.55	rs34928225	C	T	0.19977	0.0425421	3483	2.65553e-06	22.038
phylum.Euryarchaeota.id.55	rs73031978	G	C	-0.197523	0.0414497	3501	1.88519e-06	22.6957
phylum.Euryarchaeota.id.55	rs76029318	C	T	0.214866	0.0438442	3660	9.55051e-07	24.0035
phylum.Euryarchaeota.id.55	rs7635189	A	G	0.119983	0.0259356	3483	3.72432e-06	21.3895
phylum.Euryarchaeota.id.55	rs77658038	C	A	-0.160157	0.0340856	3810	2.61876e-06	22.0658
phylum.Firmicutes.id.1672	rs112334273	A	G	0.0627459	0.0127415	18217	8.45679e-07	24.2482
phylum.Firmicutes.id.1672	rs2009919	C	T	0.0536457	0.0106294	17859	4.49046e-07	25.4683
phylum.Firmicutes.id.1672	rs2332027	A	G	-0.0482656	0.0104823	18340	4.13485e-06	21.199
phylum.Firmicutes.id.1672	rs3792064	A	G	0.0897349	0.0182532	17812	8.82792e-07	24.1655
phylum.Firmicutes.id.1672	rs3852931	T	C	-0.0482086	0.0105	18260	4.40486e-06	21.0778
phylum.Firmicutes.id.1672	rs7247191	C	T	-0.0713033	0.0157424	18340	5.91575e-06	20.513
phylum.Firmicutes.id.1672	rs7557870	A	T	0.0987373	0.0187352	17859	1.36307e-07	27.7714
phylum.Firmicutes.id.1672	rs7975768	G	C	0.0512732	0.0109226	17859	2.67631e-06	22.0332
phylum.Lentisphaerae.id.2238	rs1002941	A	G	0.107661	0.0233382	4739	3.96773e-06	21.2714
phylum.Lentisphaerae.id.2238	rs11770843	T	C	0.111896	0.0234776	4709	1.87869e-06	22.7056
phylum.Lentisphaerae.id.2238	rs2731834	G	C	0.109935	0.0236848	4738	3.45788e-06	21.535
phylum.Lentisphaerae.id.2238	rs2825714	G	A	-0.138226	0.0289096	4739	1.74142e-06	22.8514
phylum.Lentisphaerae.id.2238	rs62570196	T	C	-0.217203	0.0439621	3716	7.78472e-07	24.3973
phylum.Lentisphaerae.id.2238	rs77599476	G	A	0.229981	0.0479918	3726	1.65047e-06	22.9519
phylum.Proteobacteria.id.2375	rs12150865	T	C	0.0511615	0.0106407	17769	1.52379e-06	23.1151
phylum.Proteobacteria.id.2375	rs2347697	T	G	0.0502281	0.0108968	18248	4.03752e-06	21.2446
phylum.Proteobacteria.id.2375	rs2532663	A	G	-0.125578	0.0258034	13013	1.13459e-06	23.6814
phylum.Proteobacteria.id.2375	rs312757	G	C	-0.0517269	0.0112854	18250	4.57186e-06	21.0065
phylum.Proteobacteria.id.2375	rs922773	T	C	-0.0803778	0.0157851	18132	3.543e-07	25.9256
phylum.Tenericutes.id.3919	rs10108398	A	G	0.0769142	0.0153953	10932	5.85431e-07	24.9551
phylum.Tenericutes.id.3919	rs12566890	G	T	-0.101147	0.0230978	11371	1.19186e-05	19.1729
phylum.Tenericutes.id.3919	rs3768491	G	A	-0.0681052	0.0149061	11002	4.90185e-06	20.8715
phylum.Tenericutes.id.3919	rs6043847	C	T	-0.114937	0.0248606	11130	3.77745e-06	21.3707
phylum.Tenericutes.id.3919	rs67374027	T	A	0.0752392	0.0154766	11389	1.16517e-06	23.6297
phylum.Tenericutes.id.3919	rs72901605	C	T	-0.0841852	0.0178119	10526	2.286e-06	22.3341
phylum.Tenericutes.id.3919	rs74603314	C	T	0.221639	0.0462918	4499	1.68555e-06	22.9136
phylum.Verrucomicrobia.id.3982	rs11252894	C	A	0.0784055	0.0162769	12381	1.45751e-06	23.1995
phylum.Verrucomicrobia.id.3982	rs117107102	G	A	0.204283	0.0427565	5071	1.77208e-06	22.8185
phylum.Verrucomicrobia.id.3982	rs11729256	C	T	0.0696984	0.0146953	12377	2.10688e-06	22.4914
phylum.Verrucomicrobia.id.3982	rs12908520	A	G	0.0594916	0.012823	12380	3.49357e-06	21.5209
phylum.Verrucomicrobia.id.3982	rs2602429	T	C	0.0764148	0.0153487	12104	6.40475e-07	24.7823
phylum.Verrucomicrobia.id.3982	rs45598138	A	C	-0.143901	0.03054	9932	2.45417e-06	22.1975
phylum.Verrucomicrobia.id.3982	rs74542928	C	T	0.115994	0.0231324	11703	5.32068e-07	25.1396
phylum.Verrucomicrobia.id.3982	rs76430504	C	T	-0.11753	0.025458	11624	3.90042e-06	21.3095
