# Supplementary material for: Impact of the gut microbiome on skin fibrosis: a Mendelian randomization study
Source: Front Med (Lausanne). 2024 Apr 17;11:1380938. doi: 10.3389/fmed.2024.1380938 (PMC11061451; doi:10.3389/fmed.2024.1380938)
Supplement: Supplementary file 17 [file Table_3.XLSX]

## Sheet: Sheet1
Supplemental Table 3. MR results of all traits (p < 5E-06).
Exposure	Outcome	Method	Number of SNP	β	SE	p-value	OR	OR_lci95	OR_uci95
class.Alphaproteobacteria.id.2379	Keloid	Inverse variance weighted	3	1.2812	0.819056	0.117761	3.60096	0.723142	17.9314
class.Bacilli.id.1673	Keloid	Inverse variance weighted	9	-0.10197	0.589268	0.862616	0.903057	0.284525	2.86622
class.Betaproteobacteria.id.2867	Keloid	Inverse variance weighted	8	0.849185	0.702856	0.226974	2.33774	0.58954	9.27
class.Clostridia.id.1859	Keloid	Inverse variance weighted	7	-0.970765	0.773253	0.209323	0.378793	0.0832138	1.72428
class.Coriobacteriia.id.809	Keloid	Inverse variance weighted	5	-1.42577	0.999746	0.153829	0.240322	0.0338683	1.70528
class.Deltaproteobacteria	Keloid	Inverse variance weighted	7	-0.450415	0.622748	0.469514	0.637364	0.188059	2.16014
class.Erysipelotrichia.id.2147	Keloid	Inverse variance weighted	8	-1.20513	0.681435	0.0769747	0.299654	0.0788081	1.13938
class.Gammaproteobacteria.id.3303	Keloid	Inverse variance weighted	3	-0.243986	1.08401	0.82192	0.783499	0.0936072	6.55794
class.Lentisphaeria.id.2250	Keloid	Inverse variance weighted	5	-0.114734	0.436715	0.792766	0.891603	0.37882	2.09851
class.Melainabacteria.id.1589	Keloid	Inverse variance weighted	4	0.188511	0.526873	0.720498	1.20745	0.429919	3.39119
class.Methanobacteria.id.119	Keloid	Inverse variance weighted	4	0.113956	0.424051	0.788136	1.1207	0.488125	2.57306
class.Mollicutes.id.3920	Keloid	Inverse variance weighted	6	0.274193	0.626104	0.661433	1.31547	0.385594	4.48777
class.Negativicutes.id.2164	Keloid	Inverse variance weighted	7	0.0943161	0.734302	0.897798	1.09891	0.260562	4.63459
class.Verrucomicrobiae.id.4029	Keloid	Inverse variance weighted	9	-0.530141	0.511984	0.300452	0.588522	0.215751	1.60536
family.Acidaminococcaceae.id.2166	Keloid	Inverse variance weighted	4	-0.819993	0.891891	0.357893	0.440435	0.0766812	2.52973
family.Actinomycetaceae.id.421	Keloid	Inverse variance weighted	2	-0.710567	0.799978	0.374415	0.491366	0.102435	2.357
family.Alcaligenaceae.id.2875	Keloid	Inverse variance weighted	7	0.537101	0.718026	0.454445	1.71104	0.418855	6.98966
family.Bacteroidaceae.id.917	Keloid	Inverse variance weighted	5	-0.387823	0.917367	0.672472	0.678532	0.112381	4.09684
family.BacteroidalesS24.7group.id.11173	Keloid	Inverse variance weighted	5	0.728762	0.649428	0.261795	2.07251	0.580354	7.40118
family.Christensenellaceae.id.1866	Keloid	Inverse variance weighted	3	0.013924	1.13276	0.990193	1.01402	0.11011	9.33831
family.Clostridiaceae1.id.1869	Keloid	Inverse variance weighted	2	0.850607	1.04626	0.416221	2.34107	0.301173	18.1975
family.ClostridialesvadinBB60group.id.11286	Keloid	Inverse variance weighted	10	-0.0479027	0.590432	0.935337	0.953227	0.299647	3.03237
family.Coriobacteriaceae.id.811	Keloid	Inverse variance weighted	5	-1.42577	0.999746	0.153829	0.240322	0.0338683	1.70528
family.Defluviitaleaceae.id.1924	Keloid	Inverse variance weighted	8	0.306787	0.460218	0.50502	1.35905	0.55143	3.34951
family.Desulfovibrionaceae.id.3169	Keloid	Inverse variance weighted	8	-0.073372	0.582977	0.899845	0.929255	0.296412	2.91323
family.Enterobacteriaceae.id.3469	Keloid	Inverse variance weighted	2	1.15213	2.14354	0.590931	3.16492	0.0473962	211.34
family.Erysipelotrichaceae.id.2149	Keloid	Inverse variance weighted	8	-1.20513	0.681435	0.0769747	0.299654	0.0788081	1.13938
family.FamilyXI.id.1936	Keloid	Inverse variance weighted	7	-0.266836	0.31842	0.40203	0.765799	0.410271	1.42942
family.FamilyXIII.id.1957	Keloid	Inverse variance weighted	6	-0.501864	0.917988	0.584585	0.605401	0.100147	3.65974
family.Lachnospiraceae.id.1987	Keloid	Inverse variance weighted	6	0.712687	0.796139	0.370692	2.03946	0.428379	9.70965
family.Lactobacillaceae.id.1836	Keloid	Inverse variance weighted	5	0.294789	0.538662	0.584199	1.34284	0.467204	3.85961
family.Methanobacteriaceae.id.121	Keloid	Inverse variance weighted	4	0.113956	0.424051	0.788136	1.1207	0.488125	2.57306
family.Oxalobacteraceae.id.2966	Keloid	Inverse variance weighted	7	0.559164	0.38724	0.148746	1.74921	0.818874	3.73652
family.Pasteurellaceae.id.3689	Keloid	Inverse variance weighted	7	0.0183298	0.583461	0.974938	1.0185	0.32457	3.19605
family.Peptococcaceae.id.2024	Keloid	Inverse variance weighted	8	-0.375079	0.470329	0.425171	0.687235	0.273372	1.72765
family.Peptostreptococcaceae.id.2042	Keloid	Inverse variance weighted	7	0.395329	0.5721	0.489556	1.48487	0.483847	4.55691
family.Porphyromonadaceae.id.943	Keloid	Inverse variance weighted	3	-0.605686	1.18517	0.609313	0.5457	0.0534708	5.56918
family.Prevotellaceae.id.960	Keloid	Inverse variance weighted	9	0.150267	0.560265	0.78854	1.16214	0.387573	3.48471
family.Rhodospirillaceae.id.2717	Keloid	Inverse variance weighted	7	-0.642479	0.522172	0.218548	0.525987	0.189014	1.46372
family.Ruminococcaceae.id.2050	Keloid	Inverse variance weighted	5	-0.186898	0.693128	0.787434	0.829528	0.213221	3.22726
family.Streptococcaceae.id.1850	Keloid	Inverse variance weighted	8	-0.30213	0.766047	0.693285	0.739242	0.164708	3.31787
family.Veillonellaceae.id.2172	Keloid	Inverse variance weighted	9	-0.395828	0.566324	0.484588	0.673123	0.221835	2.04249
family.Verrucomicrobiaceae.id.4036	Keloid	Inverse variance weighted	9	-0.53025	0.512154	0.300513	0.588458	0.215656	1.60572
family.Victivallaceae.id.2255	Keloid	Inverse variance weighted	7	0.232012	0.327291	0.478394	1.26114	0.663997	2.39528
genus..Clostridiuminnocuumgroup.id.14397	Keloid	Inverse variance weighted	2	-0.670865	0.696678	0.335573	0.511266	0.130504	2.00296
genus..Eubacteriumbrachygroup.id.11296	Keloid	Inverse variance weighted	4	0.10055	0.518578	0.846258	1.10578	0.400171	3.05556
genus..Eubacteriumcoprostanoligenesgroup.id.11375	Keloid	Inverse variance weighted	8	-0.373331	0.713665	0.600892	0.688437	0.169973	2.78836
genus..Eubacteriumeligensgroup.id.14372	Keloid	Inverse variance weighted	3	0.597769	1.29412	0.644144	1.81806	0.143891	22.9711
genus..Eubacteriumfissicatenagroup.id.14373	Keloid	Inverse variance weighted	4	0.442046	0.460452	0.337042	1.55589	0.631006	3.83639
genus..Eubacteriumhalliigroup.id.11338	Keloid	Inverse variance weighted	8	-0.0534491	0.559148	0.923846	0.947954	0.316833	2.83625
genus..Eubacteriumnodatumgroup.id.11297	Keloid	Inverse variance weighted	3	-0.761331	0.554831	0.170006	0.467045	0.157426	1.38561
genus..Eubacteriumoxidoreducensgroup.id.11339	Keloid	Inverse variance weighted	3	-0.173302	0.647797	0.789065	0.840884	0.236222	2.99331
genus..Eubacteriumrectalegroup.id.14374	Keloid	Inverse variance weighted	4	-0.550451	0.963884	0.567948	0.57669	0.0871902	3.81432
genus..Eubacteriumruminantiumgroup.id.11340	Keloid	Inverse variance weighted	10	0.186965	0.601738	0.756022	1.20559	0.370671	3.9211
genus..Eubacteriumventriosumgroup.id.11341	Keloid	Inverse variance weighted	7	-0.285459	0.91194	0.754262	0.751669	0.125825	4.49041
genus..Eubacteriumxylanophilumgroup.id.14375	Keloid	Inverse variance weighted	6	-1.16936	0.692846	0.091456	0.310565	0.0798711	1.20758
genus..Ruminococcusgauvreauiigroup.id.11342	Keloid	Inverse variance weighted	6	0.938356	0.945935	0.321203	2.55578	0.400246	16.3199
genus..Ruminococcusgnavusgroup.id.14376	Keloid	Inverse variance weighted	7	0.663923	0.438712	0.130192	1.9424	0.822051	4.58962
genus..Ruminococcustorquesgroup.id.14377	Keloid	Inverse variance weighted	4	-1.93282	1.06599	0.0698065	0.14474	0.0179142	1.16944
genus.Actinomyces.id.423	Keloid	Inverse variance weighted	2	0.920953	0.918656	0.316102	2.51168	0.414944	15.2034
genus.Adlercreutzia.id.812	Keloid	Inverse variance weighted	4	0.704316	0.664892	0.289466	2.02246	0.549431	7.44472
genus.Akkermansia.id.4037	Keloid	Inverse variance weighted	9	-0.528099	0.512006	0.302339	0.589725	0.216183	1.60871
genus.Alistipes.id.968	Keloid	Inverse variance weighted	5	-1.15664	0.913524	0.205468	0.314542	0.0524894	1.88489
genus.Allisonella.id.2174	Keloid	Inverse variance weighted	3	-0.737827	0.491988	0.133696	0.478152	0.182296	1.25416
genus.Alloprevotella.id.961	Keloid	Inverse variance weighted	2	0.41437	0.88922	0.641221	1.51342	0.264874	8.64724
genus.Anaerofilum.id.2053	Keloid	Inverse variance weighted	6	-0.937514	0.482056	0.051796	0.3916	0.152233	1.00734
genus.Anaerostipes.id.1991	Keloid	Inverse variance weighted	8	-0.914801	0.807772	0.257425	0.400596	0.0822464	1.95118
genus.Bacteroides.id.918	Keloid	Inverse variance weighted	5	-0.387823	0.917367	0.672472	0.678532	0.112381	4.09684
genus.Barnesiella.id.944	Keloid	Inverse variance weighted	9	-1.08245	0.566285	0.0559415	0.338765	0.111652	1.02785
genus.Bifidobacterium.id.436	Keloid	Inverse variance weighted	8	-0.977659	0.523569	0.06186	0.376191	0.134815	1.04973
genus.Bilophila.id.3170	Keloid	Inverse variance weighted	6	-0.338038	0.852017	0.691552	0.713168	0.134258	3.7883
genus.Blautia.id.1992	Keloid	Inverse variance weighted	5	-1.1803	0.858658	0.16926	0.307187	0.0570818	1.65313
genus.Butyricicoccus.id.2055	Keloid	Inverse variance weighted	2	-0.853625	1.36983	0.533178	0.425868	0.0290572	6.24162
genus.Butyricimonas.id.945	Keloid	Inverse variance weighted	8	-0.24401	0.537659	0.649946	0.78348	0.273126	2.24746
genus.Butyrivibrio.id.1993	Keloid	Inverse variance weighted	7	0.0615527	0.331062	0.852504	1.06349	0.55581	2.03488
genus.CandidatusSoleaferrea.id.11350	Keloid	Inverse variance weighted	3	-0.930705	0.677571	0.169569	0.394276	0.104482	1.48785
genus.Catenibacterium.id.2153	Keloid	Inverse variance weighted	4	0.305718	0.62743	0.626078	1.3576	0.39691	4.64356
genus.ChristensenellaceaeR.7group.id.11283	Keloid	Inverse variance weighted	3	-0.864031	1.67353	0.60565	0.42146	0.0158569	11.2019
genus.Clostridiumsensustricto1.id.1873	Keloid	Inverse variance weighted	6	0.669271	0.6	0.264657	1.95281	0.602463	6.32981
genus.Collinsella.id.815	Keloid	Inverse variance weighted	3	1.94473	1.23782	0.116161	6.99172	0.61792	79.1106
genus.Coprobacter.id.949	Keloid	Inverse variance weighted	5	-1.00216	0.624905	0.108781	0.367086	0.107854	1.24939
genus.Coprococcus1.id.11301	Keloid	Inverse variance weighted	7	0.107732	0.681329	0.874362	1.11375	0.292973	4.23396
genus.Coprococcus2.id.11302	Keloid	Inverse variance weighted	3	-2.16229	1.72648	0.210414	0.115062	0.00390232	3.39264
genus.Coprococcus3.id.11303	Keloid	Inverse variance weighted	5	-1.16336	0.796808	0.144284	0.312436	0.0655397	1.48942
genus.DefluviitaleaceaeUCG011.id.11287	Keloid	Inverse variance weighted	8	0.294165	0.464465	0.526511	1.34201	0.54	3.33515
genus.Desulfovibrio.id.3173	Keloid	Inverse variance weighted	3	0.8562	1.33144	0.520184	2.3542	0.173179	32.003
genus.Dialister.id.2183	Keloid	Inverse variance weighted	2	0.187507	2.47191	0.939535	1.20624	0.0094907	153.309
genus.Dorea.id.1997	Keloid	Inverse variance weighted	5	-0.5703	0.95863	0.551903	0.565356	0.0863614	3.70105
genus.Eggerthella.id.819	Keloid	Inverse variance weighted	5	0.668113	0.4944	0.17658	1.95055	0.740143	5.14043
genus.Eisenbergiella.id.11304	Keloid	Inverse variance weighted	5	-0.0845378	0.600572	0.888058	0.918937	0.283184	2.98197
genus.Enterorhabdus.id.820	Keloid	Inverse variance weighted	3	0.0863576	0.640663	0.892775	1.0902	0.310571	3.82691
genus.Erysipelatoclostridium.id.11381	Keloid	Inverse variance weighted	8	-0.436513	0.564445	0.439316	0.646286	0.213776	1.95385
genus.ErysipelotrichaceaeUCG003.id.11384	Keloid	Inverse variance weighted	8	0.613511	0.580741	0.290773	1.8469	0.591708	5.76476
genus.Escherichia.Shigella.id.3504	Keloid	Inverse variance weighted	4	-0.391456	0.801315	0.625184	0.676072	0.140572	3.25152
genus.Faecalibacterium.id.2057	Keloid	Inverse variance weighted	3	0.903884	1.38281	0.513333	2.46917	0.16424	37.1215
genus.FamilyXIIIAD3011group.id.11293	Keloid	Inverse variance weighted	7	0.684471	0.751829	0.362608	1.98272	0.454247	8.65429
genus.FamilyXIIIUCG001.id.11294	Keloid	Inverse variance weighted	5	-0.158759	0.700253	0.820644	0.853202	0.216264	3.36604
genus.Flavonifractor.id.2059	Keloid	Inverse variance weighted	4	-0.591443	0.743728	0.426473	0.553528	0.128845	2.37801
genus.Fusicatenibacter.id.11305	Keloid	Inverse variance weighted	8	0.277796	0.694109	0.688995	1.32022	0.338694	5.14616
genus.Gordonibacter.id.821	Keloid	Inverse variance weighted	3	-0.185867	0.508971	0.714975	0.830384	0.30622	2.25177
genus.Haemophilus.id.3698	Keloid	Inverse variance weighted	9	0.330395	0.495865	0.505219	1.39152	0.526502	3.67771
genus.Holdemanella.id.11393	Keloid	Inverse variance weighted	4	0.373944	0.803483	0.641642	1.45346	0.300929	7.02006
genus.Holdemania.id.2157	Keloid	Inverse variance weighted	5	0.00328662	0.758912	0.996545	1.00329	0.226688	4.44044
genus.Howardella.id.2000	Keloid	Inverse variance weighted	7	0.156389	0.347526	0.652706	1.16928	0.591696	2.31067
genus.Intestinibacter.id.11345	Keloid	Inverse variance weighted	6	-0.0579836	0.851748	0.945725	0.943665	0.177744	5.01004
genus.Intestinimonas.id.2062	Keloid	Inverse variance weighted	12	0.113519	0.445087	0.798686	1.12021	0.468204	2.68019
genus.Lachnoclostridium.id.11308	Keloid	Inverse variance weighted	6	-0.289566	1.03804	0.78028	0.748589	0.0978691	5.72587
genus.Lachnospira.id.2004	Keloid	Inverse variance weighted	4	0.318083	0.952224	0.738348	1.37449	0.212614	8.88568
genus.LachnospiraceaeFCS020group.id.11314	Keloid	Inverse variance weighted	8	-0.188352	0.53826	0.726393	0.828323	0.288419	2.3789
genus.LachnospiraceaeNC2004group.id.11316	Keloid	Inverse variance weighted	3	-0.331445	0.673833	0.622804	0.717886	0.191636	2.68927
genus.LachnospiraceaeND3007group.id.11317	Keloid	Wald ratio	1	2.49705	1.79143	0.163353	12.1466	0.362708	406.772
genus.LachnospiraceaeNK4A136group.id.11319	Keloid	Inverse variance weighted	7	0.0234108	0.64775	0.971169	1.02369	0.287601	3.64371
genus.LachnospiraceaeUCG001.id.11321	Keloid	Inverse variance weighted	7	-0.112229	0.564952	0.842535	0.89384	0.295367	2.70493
genus.LachnospiraceaeUCG008.id.11328	Keloid	Inverse variance weighted	8	-0.557483	0.429908	0.194717	0.572649	0.246572	1.32994
genus.LachnospiraceaeUCG010.id.11330	Keloid	Inverse variance weighted	4	-1.12147	0.831678	0.177518	0.325802	0.0638286	1.663
genus.Lactobacillus.id.1837	Keloid	Inverse variance weighted	7	0.141936	0.456519	0.755869	1.1525	0.471027	2.81993
genus.Lactococcus.id.1851	Keloid	Inverse variance weighted	6	0.0392424	0.525334	0.940454	1.04002	0.371423	2.91217
genus.Marvinbryantia.id.2005	Keloid	Inverse variance weighted	5	-0.631329	0.905017	0.485435	0.531884	0.0902508	3.13461
genus.Methanobrevibacter.id.123	Keloid	Inverse variance weighted	3	-0.0560617	0.548	0.918517	0.945481	0.322988	2.7677
genus.Odoribacter.id.952	Keloid	Inverse variance weighted	3	-1.87613	1.03231	0.0691557	0.153182	0.0202529	1.15859
genus.Oscillibacter.id.2063	Keloid	Inverse variance weighted	12	-0.331265	0.39379	0.400224	0.718015	0.331843	1.55358
genus.Oxalobacter.id.2978	Keloid	Inverse variance weighted	8	0.153717	0.34194	0.65304	1.16616	0.596613	2.27942
genus.Parabacteroides.id.954	Keloid	Inverse variance weighted	3	-0.316607	1.14232	0.781657	0.728617	0.0776491	6.83696
genus.Paraprevotella.id.962	Keloid	Inverse variance weighted	9	-0.165425	0.396063	0.676186	0.847533	0.389961	1.84201
genus.Parasutterella.id.2892	Keloid	Inverse variance weighted	10	0.298486	0.522465	0.567794	1.34782	0.484061	3.75285
genus.Peptococcus.id.2037	Keloid	Inverse variance weighted	8	-0.266432	0.390197	0.494725	0.766108	0.356572	1.64601
genus.Phascolarctobacterium.id.2168	Keloid	Inverse variance weighted	6	-0.448999	0.621038	0.469691	0.638266	0.188957	2.15596
genus.Prevotella7.id.11182	Keloid	Inverse variance weighted	4	-0.160335	0.43818	0.714432	0.851859	0.360896	2.01073
genus.Prevotella9.id.11183	Keloid	Inverse variance weighted	6	-0.280115	0.652328	0.667626	0.755697	0.210414	2.71407
genus.RikenellaceaeRC9gutgroup.id.11191	Keloid	Inverse variance weighted	6	0.52755	0.44977	0.240823	1.69478	0.701875	4.09227
genus.Romboutsia.id.11347	Keloid	Inverse variance weighted	3	-0.0477662	0.951926	0.95998	0.953357	0.147557	6.15958
genus.Roseburia.id.2012	Keloid	Inverse variance weighted	6	-0.679246	0.821189	0.408152	0.506999	0.10139	2.53523
genus.Ruminiclostridium5.id.11355	Keloid	Inverse variance weighted	5	-0.0462187	0.910558	0.959518	0.954833	0.160267	5.68867
genus.Ruminiclostridium6.id.11356	Keloid	Inverse variance weighted	8	-0.289573	0.535526	0.588696	0.748583	0.262054	2.1384
genus.Ruminiclostridium9.id.11357	Keloid	Inverse variance weighted	5	-0.796185	0.884826	0.368215	0.451047	0.0796237	2.55505
genus.RuminococcaceaeNK4A214group.id.11358	Keloid	Inverse variance weighted	9	0.527179	0.608466	0.386267	1.69415	0.51406	5.58326
genus.RuminococcaceaeUCG002.id.11360	Keloid	Inverse variance weighted	10	-0.117956	0.677567	0.861796	0.888735	0.235514	3.35373
genus.RuminococcaceaeUCG003.id.11361	Keloid	Inverse variance weighted	9	-0.069632	0.599041	0.907463	0.932737	0.2883	3.01768
genus.RuminococcaceaeUCG004.id.11362	Keloid	Inverse variance weighted	3	-0.575797	0.890839	0.518051	0.562257	0.0980927	3.22279
genus.RuminococcaceaeUCG005.id.11363	Keloid	Inverse variance weighted	8	0.718499	0.802546	0.37064	2.05135	0.4255	9.88965
genus.RuminococcaceaeUCG009.id.11366	Keloid	Inverse variance weighted	5	-0.101867	0.589305	0.862762	0.90315	0.284534	2.86672
genus.RuminococcaceaeUCG010.id.11367	Keloid	Inverse variance weighted	4	-0.225828	0.849062	0.790259	0.797855	0.151073	4.21367
genus.RuminococcaceaeUCG011.id.11368	Keloid	Inverse variance weighted	6	-0.391847	0.36359	0.28116	0.675807	0.331382	1.37822
genus.RuminococcaceaeUCG014.id.11371	Keloid	Inverse variance weighted	6	-0.892781	0.938827	0.341628	0.409515	0.0650316	2.57879
genus.Ruminococcus1.id.11373	Keloid	Inverse variance weighted	5	0.946713	0.874365	0.278922	2.57722	0.464385	14.303
genus.Ruminococcus2.id.11374	Keloid	Inverse variance weighted	5	-1.38991	0.711345	0.0507105	0.249097	0.0617816	1.00433
genus.Sellimonas.id.14369	Keloid	Inverse variance weighted	4	0.130649	0.417597	0.754388	1.13957	0.50266	2.58349
genus.Senegalimassilia.id.11160	Keloid	Wald ratio	1	-0.565717	1.23152	0.645973	0.567953	0.0508183	6.34753
genus.Slackia.id.825	Keloid	Inverse variance weighted	4	0.0219654	0.579467	0.969762	1.02221	0.328312	3.18267
genus.Streptococcus.id.1853	Keloid	Inverse variance weighted	12	-0.730646	0.532506	0.170035	0.481598	0.169592	1.36761
genus.Subdoligranulum.id.2070	Keloid	Inverse variance weighted	7	-0.492972	0.722061	0.494778	0.610809	0.148345	2.51499
genus.Sutterella.id.2896	Keloid	Inverse variance weighted	4	0.916534	0.827656	0.268128	2.50061	0.493777	12.6637
genus.Terrisporobacter.id.11348	Keloid	Inverse variance weighted	2	-0.824063	0.883168	0.35078	0.438646	0.0776866	2.47675
genus.Tyzzerella3.id.11335	Keloid	Inverse variance weighted	9	-0.270059	0.345223	0.434053	0.763334	0.388021	1.50167
genus.Veillonella.id.2198	Keloid	Inverse variance weighted	4	-0.919545	0.731166	0.208522	0.398701	0.0951186	1.6712
genus.Victivallis.id.2256	Keloid	Inverse variance weighted	5	0.516899	0.381181	0.175084	1.67682	0.794363	3.5396
order.Actinomycetales.id.420	Keloid	Inverse variance weighted	2	-0.712107	0.801697	0.374407	0.490609	0.101934	2.36132
order.Bacillales.id.1674	Keloid	Inverse variance weighted	4	0.331364	0.43214	0.443202	1.39287	0.597124	3.24903
order.Burkholderiales.id.2874	Keloid	Inverse variance weighted	8	0.936052	0.683519	0.170856	2.54989	0.66788	9.73522
order.Clostridiales.id.1863	Keloid	Inverse variance weighted	7	-0.969917	0.773795	0.21004	0.379114	0.083196	1.72758
order.Coriobacteriales.id.810	Keloid	Inverse variance weighted	5	-1.42577	0.999746	0.153829	0.240322	0.0338683	1.70528
order.Desulfovibrionales.id.3156	Keloid	Inverse variance weighted	8	-0.0723127	0.584456	0.901532	0.93024	0.295867	2.92478
order.Enterobacteriales.id.3468	Keloid	Inverse variance weighted	2	1.15213	2.14354	0.590931	3.16492	0.0473962	211.34
order.Erysipelotrichales.id.2148	Keloid	Inverse variance weighted	8	-1.20513	0.681435	0.0769747	0.299654	0.0788081	1.13938
order.Gastranaerophilales.id.1591	Keloid	Inverse variance weighted	4	0.189575	0.526393	0.718743	1.20874	0.430781	3.39161
order.Lactobacillales.id.1800	Keloid	Inverse variance weighted	8	0.170346	0.61406	0.781466	1.18572	0.355862	3.95074
order.Methanobacteriales.id.120	Keloid	Inverse variance weighted	4	0.113956	0.424051	0.788136	1.1207	0.488125	2.57306
order.MollicutesRF9.id.11579	Keloid	Inverse variance weighted	3	-1.0269	0.771905	0.183404	0.358115	0.0788794	1.62585
order.NB1n.id.3953	Keloid	Inverse variance weighted	9	-0.385315	0.47683	0.419046	0.680236	0.267162	1.73199
order.Pasteurellales.id.3688	Keloid	Inverse variance weighted	7	0.0183298	0.583461	0.974938	1.0185	0.32457	3.19605
order.Rhodospirillales.id.2667	Keloid	Inverse variance weighted	9	-0.353375	0.56528	0.531884	0.702314	0.231929	2.12671
order.Selenomonadales.id.2165	Keloid	Inverse variance weighted	7	0.0943161	0.734302	0.897798	1.09891	0.260562	4.63459
order.Verrucomicrobiales.id.4030	Keloid	Inverse variance weighted	9	-0.530141	0.511984	0.300452	0.588522	0.215751	1.60536
order.Victivallales.id.2254	Keloid	Inverse variance weighted	5	-0.114734	0.436715	0.792766	0.891603	0.37882	2.09851
phylum.Actinobacteria.id.400	Keloid	Inverse variance weighted	8	0.327666	0.638255	0.607687	1.38772	0.397201	4.84838
phylum.Bacteroidetes.id.905	Keloid	Inverse variance weighted	6	-2.24553	1.3055	0.0854238	0.105872	0.00819436	1.36788
phylum.Cyanobacteria.id.1500	Keloid	Inverse variance weighted	4	-1.06041	0.573314	0.0643701	0.346315	0.112579	1.06534
phylum.Euryarchaeota.id.55	Keloid	Inverse variance weighted	5	0.637129	0.415045	0.124764	1.89104	0.838316	4.26575
phylum.Firmicutes.id.1672	Keloid	Inverse variance weighted	5	0.295906	0.928248	0.749894	1.34434	0.217956	8.29184
phylum.Lentisphaerae.id.2238	Keloid	Inverse variance weighted	5	-0.133973	0.434896	0.758038	0.874613	0.372928	2.0512
phylum.Proteobacteria.id.2375	Keloid	Inverse variance weighted	3	0.621464	1.50181	0.679013	1.86165	0.0980693	35.3397
phylum.Tenericutes.id.3919	Keloid	Inverse variance weighted	6	0.274193	0.626104	0.661433	1.31547	0.385594	4.48777
phylum.Verrucomicrobia.id.3982	Keloid	Inverse variance weighted	8	-0.347263	0.551144	0.528645	0.70662	0.239907	2.08127
class.Actinobacteria.id.419	Keloid	Inverse variance weighted	8	-1.26498	0.586115	0.0309083	0.282244	0.0894775	0.890299
class.Bacteroidia.id.912	Keloid	Inverse variance weighted	6	-2.72074	0.978394	0.00542215	0.065826	0.00967323	0.447944
family.Bifidobacteriaceae.id.433	Keloid	Inverse variance weighted	7	-1.22408	0.602779	0.0422834	0.294029	0.0902184	0.958267
family.Rikenellaceae.id.967	Keloid	Inverse variance weighted	10	-1.54101	0.573402	0.00719942	0.214166	0.0696082	0.658931
genus.LachnospiraceaeUCG004.id.11324	Keloid	Inverse variance weighted	7	-1.4378	0.682125	0.0350458	0.237449	0.062364	0.90408
genus.Olsenella.id.822	Keloid	Inverse variance weighted	7	0.940502	0.350813	0.00734198	2.56127	1.28777	5.09416
genus.Oscillospira.id.2064	Keloid	Inverse variance weighted	3	1.81132	0.889365	0.041686	6.1185	1.07054	34.9693
genus.RuminococcaceaeUCG013.id.11370	Keloid	Inverse variance weighted	7	-1.34546	0.651861	0.0390156	0.260421	0.0725774	0.93444
genus.Turicibacter.id.2162	Keloid	Inverse variance weighted	6	1.13713	0.569448	0.0458369	3.1178	1.02123	9.51858
order.Bacteroidales.id.913	Keloid	Inverse variance weighted	6	-2.72074	0.978394	0.00542215	0.065826	0.00967323	0.447944
order.Bifidobacteriales.id.432	Keloid	Inverse variance weighted	7	-1.22408	0.602779	0.0422834	0.294029	0.0902184	0.958267
class.Actinobacteria.id.419	Scar conditions and fibrosis of skin	Inverse variance weighted	8	-0.0951534	0.193434	0.622779	0.909233	0.62233	1.3284
class.Alphaproteobacteria.id.2379	Scar conditions and fibrosis of skin	Inverse variance weighted	3	0.124657	0.50459	0.804873	1.13276	0.42133	3.04546
class.Bacilli.id.1673	Scar conditions and fibrosis of skin	Inverse variance weighted	9	0.335201	0.19252	0.0816617	1.39822	0.958738	2.03916
class.Bacteroidia.id.912	Scar conditions and fibrosis of skin	Inverse variance weighted	7	0.317287	0.35792	0.375362	1.3734	0.68097	2.7699
class.Betaproteobacteria.id.2867	Scar conditions and fibrosis of skin	Inverse variance weighted	8	0.153766	0.229957	0.503705	1.16622	0.743081	1.8303
class.Clostridia.id.1859	Scar conditions and fibrosis of skin	Inverse variance weighted	7	0.470258	0.252877	0.0629376	1.60041	0.974939	2.62714
class.Coriobacteriia.id.809	Scar conditions and fibrosis of skin	Inverse variance weighted	5	-0.384941	0.377763	0.308202	0.680491	0.324537	1.42686
class.Deltaproteobacteria.id.3087	Scar conditions and fibrosis of skin	Inverse variance weighted	7	0.428669	0.271562	0.114443	1.53521	0.901593	2.61413
class.Erysipelotrichia.id.2147	Scar conditions and fibrosis of skin	Inverse variance weighted	8	-0.0666756	0.222987	0.764931	0.935499	0.604273	1.44828
class.Gammaproteobacteria.id.3303	Scar conditions and fibrosis of skin	Inverse variance weighted	3	0.025991	0.354911	0.941621	1.02633	0.511896	2.05776
class.Lentisphaeria.id.2250	Scar conditions and fibrosis of skin	Inverse variance weighted	5	-0.0983593	0.170994	0.565141	0.906323	0.648232	1.26717
class.Melainabacteria.id.1589	Scar conditions and fibrosis of skin	Inverse variance weighted	4	-0.247274	0.171874	0.150238	0.780926	0.557581	1.09374
class.Methanobacteria.id.119	Scar conditions and fibrosis of skin	Inverse variance weighted	4	0.128162	0.160455	0.42444	1.13674	0.83	1.55683
class.Mollicutes.id.3920	Scar conditions and fibrosis of skin	Inverse variance weighted	6	0.153142	0.204735	0.45446	1.16549	0.780252	1.74093
class.Negativicutes.id.2164	Scar conditions and fibrosis of skin	Inverse variance weighted	7	0.159549	0.229643	0.487199	1.17298	0.747851	1.83979
class.Verrucomicrobiae.id.4029	Scar conditions and fibrosis of skin	Inverse variance weighted	9	0.0967081	0.167094	0.562747	1.10154	0.793902	1.52839
family.Acidaminococcaceae.id.2166	Scar conditions and fibrosis of skin	Inverse variance weighted	4	-0.349384	0.257828	0.175385	0.705123	0.4254	1.16878
family.Actinomycetaceae.id.421	Scar conditions and fibrosis of skin	Inverse variance weighted	2	0.267041	0.261865	0.307839	1.30609	0.781755	2.18212
family.Alcaligenaceae.id.2875	Scar conditions and fibrosis of skin	Inverse variance weighted	7	-0.113265	0.234949	0.629746	0.892914	0.5634	1.41515
family.Bacteroidaceae.id.917	Scar conditions and fibrosis of skin	Inverse variance weighted	5	0.0148683	0.285275	0.958434	1.01498	0.580264	1.77537
family.BacteroidalesS24.7group.id.11173	Scar conditions and fibrosis of skin	Inverse variance weighted	5	0.037136	0.185487	0.841318	1.03783	0.721504	1.49285
family.Bifidobacteriaceae.id.433	Scar conditions and fibrosis of skin	Inverse variance weighted	7	-0.0141359	0.221881	0.949202	0.985964	0.638251	1.52311
family.Christensenellaceae.id.1866	Scar conditions and fibrosis of skin	Inverse variance weighted	3	-0.510354	0.370614	0.168496	0.600283	0.290324	1.24116
family.Clostridiaceae1.id.1869	Scar conditions and fibrosis of skin	Inverse variance weighted	2	-0.467127	0.322177	0.147084	0.6268	0.333339	1.17861
family.ClostridialesvadinBB60group.id.11286	Scar conditions and fibrosis of skin	Inverse variance weighted	10	-0.00391043	0.150905	0.979327	0.996097	0.741052	1.33892
family.Coriobacteriaceae.id.811	Scar conditions and fibrosis of skin	Inverse variance weighted	5	-0.384941	0.377763	0.308202	0.680491	0.324537	1.42686
family.Defluviitaleaceae.id.1924	Scar conditions and fibrosis of skin	Inverse variance weighted	8	-0.0285924	0.1507	0.84952	0.971812	0.723276	1.30575
family.Desulfovibrionaceae.id.3169	Scar conditions and fibrosis of skin	Inverse variance weighted	8	0.28267	0.24147	0.241751	1.32667	0.826454	2.12963
family.Enterobacteriaceae.id.3469	Scar conditions and fibrosis of skin	Inverse variance weighted	2	-0.200834	0.393317	0.609619	0.818048	0.378426	1.76838
family.Erysipelotrichaceae.id.2149	Scar conditions and fibrosis of skin	Inverse variance weighted	8	-0.0666756	0.222987	0.764931	0.935499	0.604273	1.44828
family.FamilyXI.id.1936	Scar conditions and fibrosis of skin	Inverse variance weighted	7	0.0320399	0.134514	0.811734	1.03256	0.793257	1.34405
family.FamilyXIII.id.1957	Scar conditions and fibrosis of skin	Inverse variance weighted	6	0.410454	0.243435	0.091777	1.5075	0.935497	2.42926
family.Lachnospiraceae.id.1987	Scar conditions and fibrosis of skin	Inverse variance weighted	6	-0.34578	0.26046	0.184319	0.707668	0.424739	1.17906
family.Lactobacillaceae.id.1836	Scar conditions and fibrosis of skin	Inverse variance weighted	5	-0.129483	0.173988	0.456752	0.87855	0.62469	1.23557
family.Methanobacteriaceae.id.121	Scar conditions and fibrosis of skin	Inverse variance weighted	4	0.128162	0.160455	0.42444	1.13674	0.83	1.55683
family.Oxalobacteraceae.id.2966	Scar conditions and fibrosis of skin	Inverse variance weighted	7	-0.00858012	0.144931	0.952792	0.991457	0.746288	1.31717
family.Pasteurellaceae.id.3689	Scar conditions and fibrosis of skin	Inverse variance weighted	7	-0.0938018	0.152861	0.539452	0.910463	0.674753	1.22851
family.Peptococcaceae.id.2024	Scar conditions and fibrosis of skin	Inverse variance weighted	8	0.0482921	0.154144	0.754059	1.04948	0.775824	1.41966
family.Peptostreptococcaceae.id.2042	Scar conditions and fibrosis of skin	Inverse variance weighted	7	0.111326	0.17456	0.523636	1.11776	0.793889	1.57375
family.Porphyromonadaceae.id.943	Scar conditions and fibrosis of skin	Inverse variance weighted	3	-0.255455	0.547702	0.64092	0.774564	0.264755	2.26606
family.Prevotellaceae.id.960	Scar conditions and fibrosis of skin	Inverse variance weighted	9	-0.269487	0.229908	0.241136	0.763772	0.486701	1.19857
family.Rhodospirillaceae.id.2717	Scar conditions and fibrosis of skin	Inverse variance weighted	7	0.00487462	0.256284	0.984825	1.00489	0.608084	1.66062
family.Rikenellaceae.id.967	Scar conditions and fibrosis of skin	Inverse variance weighted	10	-0.372312	0.20315	0.0668474	0.689139	0.462788	1.0262
family.Ruminococcaceae.id.2050	Scar conditions and fibrosis of skin	Inverse variance weighted	5	-0.122417	0.22682	0.589397	0.884779	0.567233	1.38009
family.Streptococcaceae.id.1850	Scar conditions and fibrosis of skin	Inverse variance weighted	8	-0.278576	0.212761	0.19042	0.756861	0.498782	1.14848
family.Veillonellaceae.id.2172	Scar conditions and fibrosis of skin	Inverse variance weighted	9	0.0765418	0.231469	0.740887	1.07955	0.685822	1.69931
family.Verrucomicrobiaceae.id.4036	Scar conditions and fibrosis of skin	Inverse variance weighted	9	0.0967356	0.167149	0.562766	1.10157	0.793837	1.52859
family.Victivallaceae.id.2255	Scar conditions and fibrosis of skin	Inverse variance weighted	7	0.0105653	0.107214	0.9215	1.01062	0.81908	1.24695
genus..Clostridiuminnocuumgroup.id.14397	Scar conditions and fibrosis of skin	Inverse variance weighted	2	0.15625	0.22772	0.492619	1.16912	0.748202	1.82683
genus..Eubacteriumbrachygroup.id.11296	Scar conditions and fibrosis of skin	Inverse variance weighted	4	0.0307655	0.15914	0.846706	1.03124	0.754916	1.40872
genus..Eubacteriumcoprostanoligenesgroup.id.11375	Scar conditions and fibrosis of skin	Inverse variance weighted	8	0.128205	0.278632	0.645428	1.13679	0.658419	1.96271
genus..Eubacteriumeligensgroup.id.14372	Scar conditions and fibrosis of skin	Inverse variance weighted	3	0.00595856	0.323627	0.98531	1.00598	0.533471	1.89699
genus..Eubacteriumfissicatenagroup.id.14373	Scar conditions and fibrosis of skin	Inverse variance weighted	4	0.0540052	0.223503	0.809066	1.05549	0.681091	1.6357
genus..Eubacteriumhalliigroup.id.11338	Scar conditions and fibrosis of skin	Inverse variance weighted	8	-0.264055	0.186308	0.156394	0.767931	0.533008	1.1064
genus..Eubacteriumnodatumgroup.id.11297	Scar conditions and fibrosis of skin	Inverse variance weighted	3	0.0725772	0.261906	0.781694	1.07528	0.643549	1.79663
genus..Eubacteriumoxidoreducensgroup.id.11339	Scar conditions and fibrosis of skin	Inverse variance weighted	3	0.279336	0.193207	0.148236	1.32225	0.905427	1.93097
genus..Eubacteriumrectalegroup.id.14374	Scar conditions and fibrosis of skin	Inverse variance weighted	4	0.0544187	0.324071	0.866645	1.05593	0.559473	1.99291
genus..Eubacteriumruminantiumgroup.id.11340	Scar conditions and fibrosis of skin	Inverse variance weighted	10	-0.0884308	0.132188	0.50351	0.915366	0.706438	1.18608
genus..Eubacteriumventriosumgroup.id.11341	Scar conditions and fibrosis of skin	Inverse variance weighted	7	0.0101629	0.226405	0.964197	1.01021	0.648177	1.57447
genus..Eubacteriumxylanophilumgroup.id.14375	Scar conditions and fibrosis of skin	Inverse variance weighted	6	-0.419727	0.226494	0.0638608	0.657226	0.421618	1.0245
genus..Ruminococcusgauvreauiigroup.id.11342	Scar conditions and fibrosis of skin	Inverse variance weighted	6	-0.0614405	0.227501	0.787108	0.940409	0.602094	1.46882
genus..Ruminococcusgnavusgroup.id.14376	Scar conditions and fibrosis of skin	Inverse variance weighted	7	-0.0365811	0.173071	0.832603	0.96408	0.686739	1.35343
genus..Ruminococcustorquesgroup.id.14377	Scar conditions and fibrosis of skin	Inverse variance weighted	4	-0.131321	0.312855	0.674669	0.876936	0.474964	1.61911
genus.Actinomyces.id.423	Scar conditions and fibrosis of skin	Inverse variance weighted	2	-0.0343629	0.301445	0.909243	0.966221	0.535157	1.7445
genus.Adlercreutzia.id.812	Scar conditions and fibrosis of skin	Inverse variance weighted	4	-0.267645	0.216988	0.217406	0.765179	0.500103	1.17076
genus.Akkermansia.id.4037	Scar conditions and fibrosis of skin	Inverse variance weighted	9	0.096355	0.167103	0.564195	1.10115	0.793608	1.52787
genus.Alistipes.id.968	Scar conditions and fibrosis of skin	Inverse variance weighted	5	-0.580382	0.414509	0.161463	0.559685	0.248374	1.26119
genus.Allisonella.id.2174	Scar conditions and fibrosis of skin	Inverse variance weighted	3	-0.0751927	0.146712	0.608287	0.927565	0.695762	1.2366
genus.Alloprevotella.id.961	Scar conditions and fibrosis of skin	Inverse variance weighted	2	-0.00970306	0.226669	0.965855	0.990344	0.635099	1.5443
genus.Anaerofilum.id.2053	Scar conditions and fibrosis of skin	Inverse variance weighted	6	-0.0236649	0.139172	0.864978	0.976613	0.743458	1.28289
genus.Anaerostipes.id.1991	Scar conditions and fibrosis of skin	Inverse variance weighted	8	-0.141446	0.232222	0.542459	0.868102	0.550681	1.36849
genus.Bacteroides.id.918	Scar conditions and fibrosis of skin	Inverse variance weighted	5	0.0148683	0.285275	0.958434	1.01498	0.580264	1.77537
genus.Barnesiella.id.944	Scar conditions and fibrosis of skin	Inverse variance weighted	9	-0.163341	0.259685	0.529352	0.849302	0.510521	1.4129
genus.Bifidobacterium.id.436	Scar conditions and fibrosis of skin	Inverse variance weighted	8	0.00510743	0.188651	0.978401	1.00512	0.694441	1.45479
genus.Bilophila.id.3170	Scar conditions and fibrosis of skin	Inverse variance weighted	6	0.140441	0.226405	0.535055	1.15078	0.738368	1.79354
genus.Blautia.id.1992	Scar conditions and fibrosis of skin	Inverse variance weighted	5	-0.25299	0.327933	0.44043	0.776476	0.408306	1.47663
genus.Butyricicoccus.id.2055	Scar conditions and fibrosis of skin	Inverse variance weighted	2	-0.296959	1.0478	0.776861	0.743074	0.0953069	5.79349
genus.Butyricimonas.id.945	Scar conditions and fibrosis of skin	Inverse variance weighted	8	0.0708415	0.17762	0.690014	1.07341	0.757831	1.52041
genus.Butyrivibrio.id.1993	Scar conditions and fibrosis of skin	Inverse variance weighted	7	-0.0807906	0.108142	0.455017	0.922387	0.746209	1.14016
genus.CandidatusSoleaferrea.id.11350	Scar conditions and fibrosis of skin	Inverse variance weighted	3	-0.248843	0.221549	0.261354	0.779703	0.50506	1.20369
genus.Catenibacterium.id.2153	Scar conditions and fibrosis of skin	Inverse variance weighted	4	0.00867923	0.13945	0.950372	1.00872	0.767481	1.32578
genus.ChristensenellaceaeR.7group.id.11283	Scar conditions and fibrosis of skin	Inverse variance weighted	3	-0.364993	0.583675	0.531751	0.694202	0.221132	2.17932
genus.Clostridiumsensustricto1.id.1873	Scar conditions and fibrosis of skin	Inverse variance weighted	6	-0.246122	0.228351	0.281113	0.781827	0.499729	1.22317
genus.Collinsella.id.815	Scar conditions and fibrosis of skin	Inverse variance weighted	3	-0.328991	0.335204	0.326364	0.71965	0.373069	1.3882
genus.Coprobacter.id.949	Scar conditions and fibrosis of skin	Inverse variance weighted	5	0.185338	0.165849	0.263775	1.20363	0.869597	1.66596
genus.Coprococcus1.id.11301	Scar conditions and fibrosis of skin	Inverse variance weighted	7	-0.082522	0.329954	0.802509	0.920791	0.48228	1.75802
genus.Coprococcus2.id.11302	Scar conditions and fibrosis of skin	Inverse variance weighted	3	-0.460354	0.330724	0.163936	0.63106	0.330029	1.20667
genus.Coprococcus3.id.11303	Scar conditions and fibrosis of skin	Inverse variance weighted	5	0.164525	0.334984	0.623325	1.17883	0.611376	2.27299
genus.DefluviitaleaceaeUCG011.id.11287	Scar conditions and fibrosis of skin	Inverse variance weighted	8	0.0606147	0.149567	0.68528	1.06249	0.792521	1.42442
genus.Desulfovibrio.id.3173	Scar conditions and fibrosis of skin	Inverse variance weighted	3	0.319063	0.275124	0.246168	1.37584	0.802375	2.35916
genus.Dialister.id.2183	Scar conditions and fibrosis of skin	Inverse variance weighted	2	-0.434216	0.370834	0.241631	0.647772	0.313157	1.33993
genus.Dorea.id.1997	Scar conditions and fibrosis of skin	Inverse variance weighted	5	-0.125594	0.273023	0.645507	0.881973	0.516479	1.50611
genus.Eggerthella.id.819	Scar conditions and fibrosis of skin	Inverse variance weighted	5	0.256603	0.156422	0.100911	1.29253	0.951244	1.75627
genus.Eisenbergiella.id.11304	Scar conditions and fibrosis of skin	Inverse variance weighted	5	-0.0534872	0.167558	0.749562	0.947918	0.682563	1.31643
genus.Enterorhabdus.id.820	Scar conditions and fibrosis of skin	Inverse variance weighted	3	-0.169143	0.210031	0.420634	0.844388	0.559449	1.27445
genus.Erysipelatoclostridium.id.11381	Scar conditions and fibrosis of skin	Inverse variance weighted	8	-0.228609	0.220606	0.300073	0.79564	0.516337	1.22603
genus.ErysipelotrichaceaeUCG003.id.11384	Scar conditions and fibrosis of skin	Inverse variance weighted	8	-0.000172724	0.189693	0.999273	0.999827	0.689374	1.45009
genus.Escherichia.Shigella.id.3504	Scar conditions and fibrosis of skin	Inverse variance weighted	4	-0.31237	0.26162	0.232483	0.731711	0.438172	1.2219
genus.Faecalibacterium.id.2057	Scar conditions and fibrosis of skin	Inverse variance weighted	3	-0.030402	0.518507	0.953244	0.970056	0.351103	2.68015
genus.FamilyXIIIAD3011group.id.11293	Scar conditions and fibrosis of skin	Inverse variance weighted	7	-0.0438753	0.216026	0.839055	0.957073	0.626701	1.46161
genus.FamilyXIIIUCG001.id.11294	Scar conditions and fibrosis of skin	Inverse variance weighted	5	0.311335	0.349666	0.373263	1.36525	0.68797	2.70927
genus.Flavonifractor.id.2059	Scar conditions and fibrosis of skin	Inverse variance weighted	4	-0.255287	0.243604	0.294658	0.774694	0.480585	1.24879
genus.Fusicatenibacter.id.11305	Scar conditions and fibrosis of skin	Inverse variance weighted	8	0.194907	0.267766	0.466675	1.2152	0.718985	2.05388
genus.Gordonibacter.id.821	Scar conditions and fibrosis of skin	Inverse variance weighted	3	0.0153749	0.228322	0.946312	1.01549	0.649121	1.58865
genus.Haemophilus.id.3698	Scar conditions and fibrosis of skin	Inverse variance weighted	9	-0.0387448	0.131723	0.768652	0.961996	0.743103	1.24537
genus.Holdemanella.id.11393	Scar conditions and fibrosis of skin	Inverse variance weighted	4	-0.185051	0.197811	0.349533	0.831062	0.563966	1.22465
genus.Holdemania.id.2157	Scar conditions and fibrosis of skin	Inverse variance weighted	5	0.139805	0.19601	0.475686	1.15005	0.783195	1.68874
genus.Howardella.id.2000	Scar conditions and fibrosis of skin	Inverse variance weighted	7	-0.0464814	0.113642	0.682528	0.954582	0.763975	1.19274
genus.Intestinibacter.id.11345	Scar conditions and fibrosis of skin	Inverse variance weighted	6	0.0439679	0.216447	0.83903	1.04495	0.683679	1.59712
genus.Intestinimonas.id.2062	Scar conditions and fibrosis of skin	Inverse variance weighted	12	-0.0434201	0.145308	0.765082	0.957509	0.720201	1.27301
genus.Lachnoclostridium.id.11308	Scar conditions and fibrosis of skin	Inverse variance weighted	6	0.165443	0.35265	0.638968	1.17992	0.591111	2.35523
genus.Lachnospira.id.2004	Scar conditions and fibrosis of skin	Inverse variance weighted	4	-0.0725079	0.311681	0.816045	0.930058	0.504896	1.71324
genus.LachnospiraceaeFCS020group.id.11314	Scar conditions and fibrosis of skin	Inverse variance weighted	8	-0.156098	0.176081	0.375341	0.855475	0.605793	1.20807
genus.LachnospiraceaeNC2004group.id.11316	Scar conditions and fibrosis of skin	Inverse variance weighted	3	0.361916	0.220667	0.100984	1.43608	0.931843	2.21316
genus.LachnospiraceaeND3007group.id.11317	Scar conditions and fibrosis of skin	Wald ratio	1	-0.182664	0.586018	0.755266	0.833048	0.264145	2.62723
genus.LachnospiraceaeUCG001.id.11321	Scar conditions and fibrosis of skin	Inverse variance weighted	7	-0.26644	0.24508	0.276968	0.766102	0.473882	1.23852
genus.LachnospiraceaeUCG004.id.11324	Scar conditions and fibrosis of skin	Inverse variance weighted	7	-0.31659	0.223298	0.156251	0.728629	0.470362	1.12871
genus.LachnospiraceaeUCG008.id.11328	Scar conditions and fibrosis of skin	Inverse variance weighted	8	-0.0133277	0.140613	0.924487	0.986761	0.749066	1.29988
genus.LachnospiraceaeUCG010.id.11330	Scar conditions and fibrosis of skin	Inverse variance weighted	4	-0.00746713	0.384612	0.98451	0.992561	0.467055	2.10934
genus.Lactobacillus.id.1837	Scar conditions and fibrosis of skin	Inverse variance weighted	7	0.0353517	0.149417	0.81297	1.03598	0.772977	1.38848
genus.Lactococcus.id.1851	Scar conditions and fibrosis of skin	Inverse variance weighted	6	-0.04779	0.128025	0.708936	0.953334	0.741768	1.22524
genus.Marvinbryantia.id.2005	Scar conditions and fibrosis of skin	Inverse variance weighted	5	0.0500834	0.234924	0.831179	1.05136	0.663407	1.66618
genus.Methanobrevibacter.id.123	Scar conditions and fibrosis of skin	Inverse variance weighted	3	0.0463461	0.202727	0.81917	1.04744	0.703984	1.55845
genus.Odoribacter.id.952	Scar conditions and fibrosis of skin	Inverse variance weighted	3	-0.230632	0.730654	0.752267	0.794032	0.189624	3.32493
genus.Olsenella.id.822	Scar conditions and fibrosis of skin	Inverse variance weighted	5	-0.0649282	0.135858	0.632712	0.937135	0.718055	1.22306
genus.Oscillibacter.id.2063	Scar conditions and fibrosis of skin	Inverse variance weighted	12	0.14889	0.159715	0.351223	1.16055	0.848613	1.58714
genus.Oscillospira.id.2064	Scar conditions and fibrosis of skin	Inverse variance weighted	3	0.0665875	0.290891	0.81894	1.06885	0.604375	1.8903
genus.Oxalobacter.id.2978	Scar conditions and fibrosis of skin	Inverse variance weighted	8	0.0467463	0.146181	0.749132	1.04786	0.78681	1.39551
genus.Parabacteroides.id.954	Scar conditions and fibrosis of skin	Inverse variance weighted	3	0.267299	0.422391	0.526849	1.30643	0.570873	2.98974
genus.Paraprevotella.id.962	Scar conditions and fibrosis of skin	Inverse variance weighted	9	0.0311171	0.129296	0.809814	1.03161	0.800673	1.32915
genus.Parasutterella.id.2892	Scar conditions and fibrosis of skin	Inverse variance weighted	10	0.0132919	0.215083	0.950723	1.01338	0.664799	1.54474
genus.Phascolarctobacterium.id.2168	Scar conditions and fibrosis of skin	Inverse variance weighted	6	-0.0796203	0.202849	0.694682	0.923467	0.620515	1.37433
genus.Prevotella7.id.11182	Scar conditions and fibrosis of skin	Inverse variance weighted	4	0.0336679	0.143326	0.814284	1.03424	0.780944	1.36969
genus.Prevotella9.id.11183	Scar conditions and fibrosis of skin	Inverse variance weighted	6	0.197117	0.235969	0.403519	1.21789	0.766913	1.93405
genus.RikenellaceaeRC9gutgroup.id.11191	Scar conditions and fibrosis of skin	Inverse variance weighted	6	-0.0329378	0.150645	0.826926	0.967599	0.720218	1.29995
genus.Romboutsia.id.11347	Scar conditions and fibrosis of skin	Inverse variance weighted	3	0.216205	0.311421	0.487524	1.24136	0.674233	2.28551
genus.Roseburia.id.2012	Scar conditions and fibrosis of skin	Inverse variance weighted	6	-0.376935	0.268156	0.159826	0.68596	0.405546	1.16027
genus.Ruminiclostridium5.id.11355	Scar conditions and fibrosis of skin	Inverse variance weighted	5	-0.0478787	0.297113	0.871978	0.953249	0.532475	1.70653
genus.Ruminiclostridium6.id.11356	Scar conditions and fibrosis of skin	Inverse variance weighted	8	0.123481	0.182525	0.498712	1.13143	0.79115	1.61806
genus.Ruminiclostridium9.id.11357	Scar conditions and fibrosis of skin	Inverse variance weighted	5	0.158558	0.289151	0.583447	1.17182	0.66486	2.06534
genus.RuminococcaceaeNK4A214group.id.11358	Scar conditions and fibrosis of skin	Inverse variance weighted	9	-0.0943181	0.199078	0.63566	0.909993	0.615999	1.3443
genus.RuminococcaceaeUCG002.id.11360	Scar conditions and fibrosis of skin	Inverse variance weighted	10	-0.00796776	0.181362	0.964958	0.992064	0.695283	1.41553
genus.RuminococcaceaeUCG003.id.11361	Scar conditions and fibrosis of skin	Inverse variance weighted	9	-0.359955	0.191976	0.060792	0.697708	0.478917	1.01645
genus.RuminococcaceaeUCG004.id.11362	Scar conditions and fibrosis of skin	Inverse variance weighted	3	-0.059324	0.251577	0.813581	0.942401	0.575558	1.54306
genus.RuminococcaceaeUCG005.id.11363	Scar conditions and fibrosis of skin	Inverse variance weighted	8	0.103093	0.194642	0.596352	1.10859	0.756989	1.62351
genus.RuminococcaceaeUCG009.id.11366	Scar conditions and fibrosis of skin	Inverse variance weighted	5	0.14624	0.192594	0.447662	1.15747	0.793546	1.6883
genus.RuminococcaceaeUCG010.id.11367	Scar conditions and fibrosis of skin	Inverse variance weighted	4	-0.337902	0.448383	0.451089	0.713265	0.296196	1.7176
genus.RuminococcaceaeUCG011.id.11368	Scar conditions and fibrosis of skin	Inverse variance weighted	6	-0.0121524	0.152164	0.936345	0.987921	0.733158	1.33121
genus.RuminococcaceaeUCG013.id.11370	Scar conditions and fibrosis of skin	Inverse variance weighted	7	-0.251401	0.207956	0.226696	0.777711	0.517371	1.16905
genus.RuminococcaceaeUCG014.id.11371	Scar conditions and fibrosis of skin	Inverse variance weighted	6	0.167787	0.210904	0.426287	1.18269	0.782247	1.78811
genus.Ruminococcus1.id.11373	Scar conditions and fibrosis of skin	Inverse variance weighted	5	-0.116896	0.280448	0.676809	0.889677	0.513465	1.54154
genus.Ruminococcus2.id.11374	Scar conditions and fibrosis of skin	Inverse variance weighted	5	-0.223354	0.255709	0.382408	0.799832	0.484545	1.32027
genus.Senegalimassilia.id.11160	Scar conditions and fibrosis of skin	Wald ratio	1	0.529114	0.402696	0.18887	1.69743	0.77092	3.73743
genus.Slackia.id.825	Scar conditions and fibrosis of skin	Inverse variance weighted	4	0.112363	0.189659	0.553552	1.11892	0.771538	1.6227
genus.Streptococcus.id.1853	Scar conditions and fibrosis of skin	Inverse variance weighted	12	-0.0342626	0.174098	0.843983	0.966318	0.68695	1.3593
genus.Subdoligranulum.id.2070	Scar conditions and fibrosis of skin	Inverse variance weighted	7	-0.055252	0.293122	0.850489	0.946247	0.532714	1.68079
genus.Sutterella.id.2896	Scar conditions and fibrosis of skin	Inverse variance weighted	4	0.278872	0.29894	0.350888	1.32164	0.735613	2.37452
genus.Terrisporobacter.id.11348	Scar conditions and fibrosis of skin	Inverse variance weighted	2	0.172849	0.247694	0.48528	1.18869	0.731521	1.93156
genus.Turicibacter.id.2162	Scar conditions and fibrosis of skin	Inverse variance weighted	6	-0.426712	0.231933	0.0657969	0.652652	0.414244	1.02827
genus.Tyzzerella3.id.11335	Scar conditions and fibrosis of skin	Inverse variance weighted	9	-0.154039	0.134335	0.251517	0.857239	0.658799	1.11545
genus.Veillonella.id.2198	Scar conditions and fibrosis of skin	Inverse variance weighted	4	0.15693	0.239323	0.512001	1.16991	0.731877	1.87012
order.Actinomycetales.id.420	Scar conditions and fibrosis of skin	Inverse variance weighted	2	0.267398	0.262427	0.308231	1.30656	0.781172	2.1853
order.Bacillales.id.1674	Scar conditions and fibrosis of skin	Inverse variance weighted	4	0.081171	0.141468	0.566118	1.08456	0.821926	1.43111
order.Bacteroidales.id.913	Scar conditions and fibrosis of skin	Inverse variance weighted	7	0.317287	0.35792	0.375362	1.3734	0.68097	2.7699
order.Bifidobacteriales.id.432	Scar conditions and fibrosis of skin	Inverse variance weighted	7	-0.0141359	0.221881	0.949202	0.985964	0.638251	1.52311
order.Burkholderiales.id.2874	Scar conditions and fibrosis of skin	Inverse variance weighted	8	0.246548	0.223638	0.27027	1.2796	0.825486	1.98353
order.Clostridiales.id.1863	Scar conditions and fibrosis of skin	Inverse variance weighted	7	0.470718	0.253054	0.0628639	1.60114	0.97505	2.62926
order.Coriobacteriales.id.810	Scar conditions and fibrosis of skin	Inverse variance weighted	5	-0.384941	0.377763	0.308202	0.680491	0.324537	1.42686
order.Desulfovibrionales.id.3156	Scar conditions and fibrosis of skin	Inverse variance weighted	8	0.284466	0.241903	0.239614	1.32905	0.827238	2.13527
order.Enterobacteriales.id.3468	Scar conditions and fibrosis of skin	Inverse variance weighted	2	-0.200834	0.393317	0.609619	0.818048	0.378426	1.76838
order.Erysipelotrichales.id.2148	Scar conditions and fibrosis of skin	Inverse variance weighted	8	-0.0666756	0.222987	0.764931	0.935499	0.604273	1.44828
order.Gastranaerophilales.id.1591	Scar conditions and fibrosis of skin	Inverse variance weighted	4	-0.246327	0.171719	0.151437	0.781667	0.558279	1.09444
order.Lactobacillales.id.1800	Scar conditions and fibrosis of skin	Inverse variance weighted	8	0.383207	0.200575	0.0560634	1.46698	0.990129	2.17349
order.Methanobacteriales.id.120	Scar conditions and fibrosis of skin	Inverse variance weighted	4	0.128162	0.160455	0.42444	1.13674	0.83	1.55683
order.MollicutesRF9.id.11579	Scar conditions and fibrosis of skin	Inverse variance weighted	3	-0.0797948	0.391343	0.838432	0.923306	0.428773	1.98822
order.NB1n.id.3953	Scar conditions and fibrosis of skin	Inverse variance weighted	9	0.0031138	0.136069	0.981743	1.00312	0.768295	1.30972
order.Pasteurellales.id.3688	Scar conditions and fibrosis of skin	Inverse variance weighted	7	-0.0938018	0.152861	0.539452	0.910463	0.674753	1.22851
order.Rhodospirillales.id.2667	Scar conditions and fibrosis of skin	Inverse variance weighted	9	0.00278701	0.236248	0.990588	1.00279	0.63112	1.59334
order.Selenomonadales.id.2165	Scar conditions and fibrosis of skin	Inverse variance weighted	7	0.159549	0.229643	0.487199	1.17298	0.747851	1.83979
order.Verrucomicrobiales.id.4030	Scar conditions and fibrosis of skin	Inverse variance weighted	9	0.0967081	0.167094	0.562747	1.10154	0.793902	1.52839
order.Victivallales.id.2254	Scar conditions and fibrosis of skin	Inverse variance weighted	5	-0.0983593	0.170994	0.565141	0.906323	0.648232	1.26717
phylum.Actinobacteria.id.400	Scar conditions and fibrosis of skin	Inverse variance weighted	8	0.107482	0.209509	0.607937	1.11347	0.738484	1.67887
phylum.Bacteroidetes.id.905	Scar conditions and fibrosis of skin	Inverse variance weighted	6	0.0716055	0.307414	0.815817	1.07423	0.58806	1.96234
phylum.Cyanobacteria.id.1500	Scar conditions and fibrosis of skin	Inverse variance weighted	4	-0.275739	0.220367	0.210836	0.759011	0.492796	1.16904
phylum.Euryarchaeota.id.55	Scar conditions and fibrosis of skin	Inverse variance weighted	5	-0.086333	0.135486	0.523989	0.917289	0.70336	1.19628
phylum.Firmicutes.id.1672	Scar conditions and fibrosis of skin	Inverse variance weighted	5	-0.133889	0.303665	0.659277	0.874687	0.482357	1.58612
phylum.Lentisphaerae.id.2238	Scar conditions and fibrosis of skin	Inverse variance weighted	5	-0.145507	0.158188	0.357661	0.864584	0.634096	1.17885
phylum.Proteobacteria.id.2375	Scar conditions and fibrosis of skin	Inverse variance weighted	3	-0.0400845	0.348249	0.908364	0.960708	0.485463	1.9012
phylum.Tenericutes.id.3919	Scar conditions and fibrosis of skin	Inverse variance weighted	6	0.153142	0.204735	0.45446	1.16549	0.780252	1.74093
phylum.Verrucomicrobia.id.3982	Scar conditions and fibrosis of skin	Inverse variance weighted	8	0.0924326	0.179605	0.606803	1.09684	0.771365	1.55965
genus.LachnospiraceaeNK4A136group.id.11319	Scar conditions and fibrosis of skin	Inverse variance weighted	7	0.602886	0.181228	0.000878908	1.82739	1.28105	2.60672
genus.Peptococcus.id.2037	Scar conditions and fibrosis of skin	Inverse variance weighted	8	-0.315832	0.127522	0.0132605	0.729182	0.56792	0.936234
genus.Sellimonas.id.14369	Scar conditions and fibrosis of skin	Inverse variance weighted	4	0.35542	0.136674	0.00930907	1.42678	1.09148	1.86508
genus.Victivallis.id.2256	Scar conditions and fibrosis of skin	Inverse variance weighted	5	-0.358162	0.124731	0.00408561	0.69896	0.547368	0.892535
