# Supplementary material for: Impact of the gut microbiome on skin fibrosis: a Mendelian randomization study
Source: Front Med (Lausanne). 2024 Apr 17;11:1380938. doi: 10.3389/fmed.2024.1380938 (PMC11061451; doi:10.3389/fmed.2024.1380938)
Supplement: Supplementary file 18 [file Table_4.XLSX]

## Sheet: Sheet1
Supplemental Table 4. The genes associated with SNP of 15 bacterial traits.
Exposure	Outcome	Number of SNP	hit or close-by genes
class.Actinobacteria.id.419	Keloid	rs11745923	CTD-2228K2.7, EXOC3, PP7080, SLC9A3
class.Actinobacteria.id.419	Keloid	rs134366	LINC01399, RP3-323A16.1
class.Actinobacteria.id.419	Keloid	rs1515761	OAT
class.Actinobacteria.id.419	Keloid	rs182549	MCM6
class.Actinobacteria.id.419	Keloid	rs1961273	THSD7B
class.Actinobacteria.id.419	Keloid	rs6660520	IL19
class.Actinobacteria.id.419	Keloid	rs72767435	MCTP2
class.Actinobacteria.id.419	Keloid	rs8047955	PLCG2, RP11-960L18.1
class.Bacteroidia.id.912	Keloid	rs73846128	EPHA3
class.Bacteroidia.id.912	Keloid	rs12938514	PITPNM3
class.Bacteroidia.id.912	Keloid	rs111845179	LINC01500
class.Bacteroidia.id.912	Keloid	rs2032750	GPR75-ASB3
class.Bacteroidia.id.912	Keloid	rs55773148	KLHL1
class.Bacteroidia.id.912	Keloid	rs929878	AC009120.4
family.Bifidobacteriaceae.id.433	Keloid	rs73797465	NR3C1
family.Bifidobacteriaceae.id.433	Keloid	rs13020688	AC098617.1, TMEFF2
family.Bifidobacteriaceae.id.433	Keloid	rs1961273	THSD7B
family.Bifidobacteriaceae.id.433	Keloid	rs182549	MCM6
family.Bifidobacteriaceae.id.433	Keloid	rs7588568	-
family.Bifidobacteriaceae.id.433	Keloid	rs4957061	RP11-310P5.2, SLC9A3
family.Bifidobacteriaceae.id.433	Keloid	rs857444	-
family.Rikenellaceae.id.967	Keloid	rs8130320	BRWD1
family.Rikenellaceae.id.967	Keloid	rs4264350	THSD4
family.Rikenellaceae.id.967	Keloid	rs1939881	-
family.Rikenellaceae.id.967	Keloid	rs77885767	ARHGEF40
family.Rikenellaceae.id.967	Keloid	rs9578457	-
family.Rikenellaceae.id.967	Keloid	rs2833282	TIAM1
family.Rikenellaceae.id.967	Keloid	rs67705352	CAPZB
family.Rikenellaceae.id.967	Keloid	rs74474130	EFCAB11, RP11-33N16.3
family.Rikenellaceae.id.967	Keloid	rs9603208	-
family.Rikenellaceae.id.967	Keloid	rs6837275	-
genus.LachnospiraceaeUCG004.id.11324	Keloid	rs12747809	FMN2
genus.LachnospiraceaeUCG004.id.11324	Keloid	rs12894272	-
genus.LachnospiraceaeUCG004.id.11324	Keloid	rs12673420	CALN1
genus.LachnospiraceaeUCG004.id.11324	Keloid	rs2444793	-
genus.LachnospiraceaeUCG004.id.11324	Keloid	rs35182105	RP11-444D3.1
genus.LachnospiraceaeUCG004.id.11324	Keloid	rs2882478	-
genus.LachnospiraceaeUCG004.id.11324	Keloid	rs11128180	-
genus.Olsenella.id.822	Keloid	rs35225860	-
genus.Olsenella.id.822	Keloid	rs2759329	DISC1
genus.Olsenella.id.822	Keloid	rs62112538	AC027319.3, UHRF1
genus.Olsenella.id.822	Keloid	rs72691585	MTAP, RP11-145E5.5
genus.Olsenella.id.822	Keloid	rs17148768	-
genus.Olsenella.id.822	Keloid	rs6046522	RIN2
genus.Olsenella.id.822	Keloid	rs1035588	-
genus.Oscillospira.id.2064	Keloid	rs1954532	CTD-3006G17.2
genus.Oscillospira.id.2064	Keloid	rs28889936	HERC3
genus.Oscillospira.id.2064	Keloid	rs12206468	-
genus.RuminococcaceaeUCG013.id.11370	Keloid	rs12189346	GNPDA1
genus.RuminococcaceaeUCG013.id.11370	Keloid	rs12485353	-
genus.RuminococcaceaeUCG013.id.11370	Keloid	rs76973485	-
genus.RuminococcaceaeUCG013.id.11370	Keloid	rs12781711	RP11-69C17.4
genus.RuminococcaceaeUCG013.id.11370	Keloid	rs11581881	SPSB1
genus.RuminococcaceaeUCG013.id.11370	Keloid	rs75088940	-
genus.RuminococcaceaeUCG013.id.11370	Keloid	rs16918863	HMGN1P20, MALRD1, RP11-265G8.3
genus.Turicibacter.id.2162	Keloid	rs55756211	MKLN1
genus.Turicibacter.id.2162	Keloid	rs2834977	RUNX1
genus.Turicibacter.id.2162	Keloid	rs149744580	WDPCP
genus.Turicibacter.id.2162	Keloid	rs4869133	CTD-2337A12.1
genus.Turicibacter.id.2162	Keloid	rs12603364	-
genus.Turicibacter.id.2162	Keloid	rs11054680	BCL2L14
order.Bacteroidales.id.913	Keloid	rs73846128	EPHA3
order.Bacteroidales.id.913	Keloid	rs12938514	PITPNM3
order.Bacteroidales.id.913	Keloid	rs111845179	LINC01500
order.Bacteroidales.id.913	Keloid	rs2032750	GPR75-ASB3
order.Bacteroidales.id.913	Keloid	rs55773148	KLHL1
order.Bacteroidales.id.913	Keloid	rs929878	AC009120.4
order.Bifidobacteriales.id.432	Keloid	rs73797465	NR3C1
order.Bifidobacteriales.id.432	Keloid	rs13020688	AC098617.1, TMEFF2
order.Bifidobacteriales.id.432	Keloid	rs1961273	THSD7B
order.Bifidobacteriales.id.432	Keloid	rs182549	MCM6
order.Bifidobacteriales.id.432	Keloid	rs7588568	-
order.Bifidobacteriales.id.432	Keloid	rs4957061	RP11-310P5.2, SLC9A3
order.Bifidobacteriales.id.432	Keloid	rs857444	-
genus.LachnospiraceaeNK4A136group.id.11319	Scar conditions and fibrosis of skin	rs68104925	CYP46A1
genus.LachnospiraceaeNK4A136group.id.11319	Scar conditions and fibrosis of skin	rs76193507	-
genus.LachnospiraceaeNK4A136group.id.11319	Scar conditions and fibrosis of skin	rs160061	AC026797.1
genus.LachnospiraceaeNK4A136group.id.11319	Scar conditions and fibrosis of skin	rs73044693	-
genus.LachnospiraceaeNK4A136group.id.11319	Scar conditions and fibrosis of skin	rs954878	TCEANC2
genus.LachnospiraceaeNK4A136group.id.11319	Scar conditions and fibrosis of skin	rs7616165	RP11-95L3.2
genus.LachnospiraceaeNK4A136group.id.11319	Scar conditions and fibrosis of skin	rs7832116	CSMD1
genus.Peptococcus.id.2037	Scar conditions and fibrosis of skin	rs413827	-
genus.Peptococcus.id.2037	Scar conditions and fibrosis of skin	rs10031059
genus.Peptococcus.id.2037	Scar conditions and fibrosis of skin	rs5770862	ODF3B, TYMP
genus.Peptococcus.id.2037	Scar conditions and fibrosis of skin	rs11001948	KCNMA1, KCNMA1-AS1
genus.Peptococcus.id.2037	Scar conditions and fibrosis of skin	rs2054133	RASGRP3
genus.Peptococcus.id.2037	Scar conditions and fibrosis of skin	rs7033353	-
genus.Peptococcus.id.2037	Scar conditions and fibrosis of skin	rs77681628	LINC01049
genus.Peptococcus.id.2037	Scar conditions and fibrosis of skin	rs62424012	-
genus.Sellimonas.id.14369	Scar conditions and fibrosis of skin	rs2371572	ERBB4
genus.Sellimonas.id.14369	Scar conditions and fibrosis of skin	rs6433790	-
genus.Sellimonas.id.14369	Scar conditions and fibrosis of skin	rs2187447	-
genus.Sellimonas.id.14369	Scar conditions and fibrosis of skin	rs56203279	DOCK4
genus.Victivallis.id.2256	Scar conditions and fibrosis of skin	rs11899949	AC010878.3, LINC00211
genus.Victivallis.id.2256	Scar conditions and fibrosis of skin	rs4764863	NUP37, PARPBP
genus.Victivallis.id.2256	Scar conditions and fibrosis of skin	rs4895919	-
genus.Victivallis.id.2256	Scar conditions and fibrosis of skin	rs56349194	TMEM41B
genus.Victivallis.id.2256	Scar conditions and fibrosis of skin	rs12512543	-
