# Supplementary material for: Impact of the gut microbiome on skin fibrosis: a Mendelian randomization study
Source: Front Med (Lausanne). 2024 Apr 17;11:1380938. doi: 10.3389/fmed.2024.1380938 (PMC11061451; doi:10.3389/fmed.2024.1380938)
Supplement: Supplementary file 19 [file Table_5.XLSX]

## Sheet: Sheet1
Supplemental Table 5. MR results of all traits (p < 5E-08).
Exposure	Outcome	Method	Number of SNP	β	SE	p-value	OR	OR_lci95	OR_uci95
class.Actinobacteria.id.419	Keloid	Wald ratio	1	-1.32755	1.03108	0.19791	0.265126	0.0351379	2.00045
family.Bifidobacteriaceae.id.433	Keloid	Wald ratio	1	-1.26427	0.981935	0.19791	0.282445	0.0412187	1.93542
family.Oxalobacteraceae.id.2966	Keloid	Wald ratio	1	0.228166	0.952554	0.810694	1.25629	0.194205	8.12683
family.Peptostreptococcaceae.id.2042	Keloid	Wald ratio	1	-0.188906	1.44794	0.896198	0.827864	0.0484672	14.1407
family.Streptococcaceae.id.1850	Keloid	Wald ratio	1	-1.15695	1.59624	0.468574	0.314443	0.0137657	7.18264
genus..Eubacteriumcoprostanoligenesgroup.id.11375	Keloid	Wald ratio	1	-0.464937	1.63474	0.776096	0.628175	0.0255014	15.4738
genus..Ruminococcustorquesgroup.id.14377	Keloid	Wald ratio	1	0.273627	1.64221	0.867668	1.31472	0.0525968	32.8632
genus.Allisonella.id.2174	Keloid	Wald ratio	1	-0.834381	0.679731	0.219628	0.434143	0.11456	1.64525
genus.Bifidobacterium.id.436	Keloid	Wald ratio	1	-1.23646	0.960331	0.19791	0.290412	0.0442144	1.9075
genus.Erysipelatoclostridium.id.11381	Keloid	Wald ratio	1	-1.48595	1.20582	0.217831	0.226287	0.0212935	2.40478
genus.Oxalobacter.id.2978	Keloid	Wald ratio	1	0.405596	0.868996	0.640685	1.5002	0.273177	8.23857
genus.Romboutsia.id.11347	Keloid	Wald ratio	1	-0.187031	1.43357	0.896198	0.829418	0.0499457	13.7737
genus.RuminococcaceaeUCG013.id.11370	Keloid	Wald ratio	1	-1.52842	1.60116	0.339796	0.216878	0.00940326	5.00212
genus.Streptococcus.id.1853	Keloid	Wald ratio	1	-1.09836	1.51539	0.468574	0.333418	0.0171026	6.50005
genus.Tyzzerella3.id.11335	Keloid	Wald ratio	1	0.223496	0.843727	0.791093	1.25044	0.239259	6.53519
order.Bifidobacteriales.id.432	Keloid	Wald ratio	1	-1.26427	0.981935	0.19791	0.282445	0.0412187	1.93542
order.Gastranaerophilales.id.1591	Keloid	Wald ratio	1	-0.361511	1.00739	0.719701	0.696623	0.0967138	5.01773
phylum.Actinobacteria.id.400	Keloid	Wald ratio	1	-1.077	1.26368	0.394066	0.340617	0.0286152	4.05448
class.Actinobacteria.id.419	Scar conditions and fibrosis of skin	Wald ratio	1	0.0786551	0.341924	0.818063	1.08183	0.553488	2.11452
family.Bifidobacteriaceae.id.433	Scar conditions and fibrosis of skin	Wald ratio	1	0.0749058	0.325625	0.818063	1.07778	0.569316	2.04037
family.Oxalobacteraceae.id.2966	Scar conditions and fibrosis of skin	Wald ratio	1	0.207854	0.311603	0.504741	1.23103	0.668388	2.26731
family.Peptostreptococcaceae.id.2042	Scar conditions and fibrosis of skin	Wald ratio	1	0.339134	0.474338	0.474633	1.40373	0.554012	3.55671
family.Streptococcaceae.id.1850	Scar conditions and fibrosis of skin	Wald ratio	1	0.525916	0.515944	0.308047	1.69201	0.615491	4.65139
genus..Eubacteriumcoprostanoligenesgroup.id.11375	Scar conditions and fibrosis of skin	Wald ratio	1	0.390268	0.533635	0.464572	1.47738	0.519102	4.20466
genus..Ruminococcustorquesgroup.id.14377	Scar conditions and fibrosis of skin	Wald ratio	1	0.487909	0.537458	0.363979	1.62891	0.568071	4.67078
genus.Allisonella.id.2174	Scar conditions and fibrosis of skin	Wald ratio	1	-0.0691875	0.222129	0.75544	0.933152	0.603771	1.44222
genus.Bifidobacterium.id.436	Scar conditions and fibrosis of skin	Wald ratio	1	0.0732578	0.318461	0.818063	1.07601	0.576416	2.00861
genus.Erysipelatoclostridium.id.11381	Scar conditions and fibrosis of skin	Wald ratio	1	0.407749	0.394177	0.300935	1.50343	0.694308	3.25547
genus.Oxalobacter.id.2978	Scar conditions and fibrosis of skin	Wald ratio	1	-0.286155	0.284287	0.314143	0.751146	0.430263	1.31134
genus.Romboutsia.id.11347	Scar conditions and fibrosis of skin	Wald ratio	1	0.335767	0.469629	0.474633	1.39901	0.55727	3.51219
genus.RuminococcaceaeUCG013.id.11370	Scar conditions and fibrosis of skin	Wald ratio	1	-0.930235	0.52372	0.075699	0.394461	0.14132	1.10104
genus.Streptococcus.id.1853	Scar conditions and fibrosis of skin	Wald ratio	1	0.499281	0.489813	0.308047	1.64754	0.630808	4.30301
genus.Tyzzerella3.id.11335	Scar conditions and fibrosis of skin	Wald ratio	1	0.124331	0.275502	0.65178	1.13239	0.65991	1.94316
order.Bifidobacteriales.id.432	Scar conditions and fibrosis of skin	Wald ratio	1	0.0749058	0.325625	0.818063	1.07778	0.569316	2.04037
order.Gastranaerophilales.id.1591	Scar conditions and fibrosis of skin	Wald ratio	1	-0.412855	0.32882	0.209274	0.661758	0.347378	1.26066
phylum.Actinobacteria.id.400	Scar conditions and fibrosis of skin	Wald ratio	1	0.0830662	0.418582	0.842696	1.08661	0.478378	2.46819
